# Supplementary material for: Ribosome Traffic on mRNAs Maps to Gene Ontology: Genome-wide Quantification of Translation Initiation Rates and Polysome Size Regulation
Source: PLOS journal article supplement (doi:10.1371/journal.pcbi.1002866), 2013-01-31
Supplement: S6 (10.1371/journal.pcbi.1002866.s006) [file journal.pcbi.1002866.s006]

301 Moved Permanently

# Moved Permanently

The document has moved here.

---

Apache Server at www.ploscompbiol.org Port 80
