# Supplementary material for: Ribosome Traffic on mRNAs Maps to Gene Ontology: Genome-wide Quantification of Translation Initiation Rates and Polysome Size Regulation
Source: PLoS Comput Biol. 2013 Jan 31;9(1):e1002866. doi: 10.1371/journal.pcbi.1002866 (PMC3561044; doi:10.1371/journal.pcbi.1002866)
Supplement: Table S2 — GO annotations of genes found in regions (i)–(iv) of Figure 2. Each sheet is named with the corresponding region (i)–(iv) of Figure 3, and with the GO aspect (process, function, component). (XLS) [file pcbi.1002866.s002.xls]

## Sheet: (i) Process
In this table we report the output files from a Gene Ontology Term Finder ( http://go.princeton.edu/cgi-bin/GOTermFinder ) developed at the Lewis-Sigler Institute at Princeton.						Legend:
Each sheet is named with the corresponding region (i)-(iv) of Figure 3, and with the GO aspect (process, function, component).						CORRECTED_PVALUE: p-value corrected after Bonferroni correction			TOTAL_NUM_ANNOTATIONS: # genes in the background population with this annotation
						NUM_LIST_ANNOTATIONS: # genes in the set with this annotation			POPULATION_SIZE: # genes in the background population
						LIST_SIZE: # genes in the set			FDR_RATE: false discovery rate
	(i) alpha_phi < 0.1 : GO process
GOID	TERM	CORRECTED_PVALUE	UNCORRECTED_PVALUE	NUM_LIST_ANNOTATIONS	LIST_SIZE	TOTAL_NUM_ANNOTATIONS	POPULATION_SIZE	FDR_RATE	EXPECTED_FALSE_POSITIVES	ANNOTATED_GENES
GO:0065007	biological regulation	4.33328719102218e-52	1.63089468988415e-55	1116	3295	1524	5841	0.00%	0	YKL203C, YHR119W, YDR140W, YPR095C, YLR085C, YKL222C, YGL244W, YGR275W, YER166W, YNL062C, YML057W, YJL081C, YHR194W, YLR362W, YHR115C, YAL015C, YFR032C, YOR047C, YKL109W, YDR130C, YKR019C, YPR031W, YLR384C, YIL075C, YLR229C, YKL126W, YMR223W, YLL051C, YJR045C, YDR258C, YLR248W, YGL066W, YFL049W, YJL005W, YBR095C, YKL190W, YJL076W, YNL236W, YDR309C, YOR058C, YGR133W, YNL161W, YDR414C, YLR399C, YHR…
GO:0050789	regulation of biological process	1.15356381067319e-50	4.34160259944745e-54	996	3295	1338	5841	0.00%	0	YNL139C, YLR429W, YOR083W, YKL203C, YOR181W, YDL042C, YHR119W, YJR089W, YOL090W, YBR297W, YDR140W, YGR116W, YPR095C, YLR085C, YBR289W, YKL222C, YGL244W, YER016W, YJL090C, YDL234C, YGR275W, YNL062C, YML057W, YIL044C, YCR027C, YBL008W, YGR238C, YJL081C, YOR057W, YDL155W, YPL203W, YLR362W, YNL085W, YMR270C, YHR115C, YAL015C, YFR032C, YOR047C, YDR206W, YKL109W, YDR130C, YKR019C, YIL084C, YDL194W, YDL…
GO:0050794	regulation of cellular process	2.88633107702347e-49	1.08631203501071e-52	965	3295	1294	5841	0.00%	0	YNL139C, YLR429W, YOR083W, YKL203C, YOR181W, YDL042C, YHR119W, YJR089W, YOL090W, YBR297W, YDR140W, YGR116W, YPR095C, YLR085C, YBR289W, YKL222C, YGL244W, YER016W, YJL090C, YDL234C, YGR275W, YNL062C, YML057W, YIL044C, YCR027C, YBL008W, YGR238C, YJL081C, YOR057W, YDL155W, YPL203W, YLR362W, YNL085W, YMR270C, YHR115C, YAL015C, YFR032C, YOR047C, YDR206W, YKL109W, YDR130C, YKR019C, YIL084C, YDL194W, YDL…
GO:0009987	cellular process	1.52111670795982e-41	5.72494056439527e-45	2755	3295	4484	5841	0.00%	0	YDR140W, YMR238W, YPR121W, YEL015W, YNL062C, YCL048W, YNR044W, YGL236C, YJL081C, YHR194W, YCR092C, YGL257C, YHR115C, YGR177C, YBR163W, YKL109W, YML075C, YDR501W, YDR130C, YOR250C, YLR384C, YLR093C, YIL075C, YGR059W, YDL040C, YKR100C, YKL126W, YMR223W, YPR001W, YDL164C, YLR059C, YLL051C, YJR045C, YIL158W, YLR248W, YKR086W, YDL112W, YCR036W, YJL005W, YPR049C, YAL002W, YCL031C, YJL076W, YNL236W, YER…
GO:0019222	regulation of metabolic process	8.78794265988893e-39	3.30746806920923e-42	736	3295	973	5841	0.00%	0	YNL139C, YOR083W, YKL203C, YDL042C, YHR119W, YOL090W, YBR297W, YDR140W, YGR116W, YLR085C, YBR289W, YKL222C, YGL244W, YJL090C, YDL234C, YGR275W, YNL062C, YIL044C, YBL008W, YJL081C, YDL155W, YLR362W, YNL085W, YMR270C, YAL015C, YFR032C, YOR047C, YDR206W, YKL109W, YKR019C, YIL084C, YDL220C, YPR031W, YLR384C, YGL209W, YIL075C, YMR223W, YOR076C, YPL042C, YLR398C, YJR045C, YDR258C, YGL066W, YFL049W, YGR…
GO:0051171	regulation of nitrogen compound metabolic process	2.95438116940573e-38	1.11192366180118e-41	592	3295	755	5841	0.00%	0	YNL139C, YOR083W, YDL042C, YHR119W, YOL090W, YBR297W, YGR116W, YLR085C, YBR289W, YKL222C, YGL244W, YDL234C, YGR275W, YIL044C, YBL008W, YJL081C, YMR270C, YAL015C, YFR032C, YOR047C, YKL109W, YKR019C, YIL084C, YDL220C, YPR031W, YLR384C, YGL209W, YMR223W, YPL042C, YGL066W, YFL049W, YGR262C, YLR005W, YOR140W, YHR178W, YOR134W, YBR095C, YOR060C, YJL076W, YNL236W, YGL162W, YHR153C, YLR399C, YDR443C, YDR…
GO:0019219	regulation of nucleobase-containing compound metabolic process	4.38081695446535e-38	1.64878319701368e-41	589	3295	751	5841	0.00%	0	YNL139C, YOR083W, YDL042C, YHR119W, YOL090W, YBR297W, YGR116W, YLR085C, YBR289W, YKL222C, YGL244W, YDL234C, YGR275W, YIL044C, YBL008W, YJL081C, YMR270C, YAL015C, YFR032C, YOR047C, YKL109W, YKR019C, YIL084C, YDL220C, YPR031W, YLR384C, YGL209W, YMR223W, YPL042C, YGL066W, YFL049W, YGR262C, YLR005W, YOR140W, YHR178W, YOR134W, YBR095C, YOR060C, YJL076W, YNL236W, YGL162W, YHR153C, YLR399C, YDR443C, YDR…
GO:0031323	regulation of cellular metabolic process	4.78350401198629e-38	1.80034023785709e-41	713	3295	940	5841	0.00%	0	YNL139C, YOR083W, YKL203C, YDL042C, YHR119W, YOL090W, YBR297W, YDR140W, YGR116W, YLR085C, YBR289W, YKL222C, YGL244W, YJL090C, YDL234C, YGR275W, YNL062C, YIL044C, YBL008W, YJL081C, YDL155W, YLR362W, YNL085W, YMR270C, YAL015C, YFR032C, YOR047C, YDR206W, YKL109W, YKR019C, YIL084C, YDL220C, YPR031W, YLR384C, YGL209W, YMR223W, YOR076C, YPL042C, YLR398C, YDR258C, YGL066W, YFL049W, YGR262C, YLR005W, YOR…
GO:0080090	regulation of primary metabolic process	8.25418301270916e-37	3.10657998220141e-40	707	3295	935	5841	0.00%	0	YNL139C, YOR083W, YDL042C, YHR119W, YOL090W, YBR297W, YDR140W, YGR116W, YLR085C, YBR289W, YKL222C, YGL244W, YJL090C, YDL234C, YGR275W, YNL062C, YIL044C, YBL008W, YJL081C, YDL155W, YLR362W, YNL085W, YMR270C, YAL015C, YFR032C, YOR047C, YDR206W, YKL109W, YKR019C, YIL084C, YDL220C, YPR031W, YLR384C, YGL209W, YIL075C, YMR223W, YOR076C, YPL042C, YLR398C, YDR258C, YGL066W, YFL049W, YGR262C, YLR005W, YOR…
GO:0006355	regulation of transcription, DNA-dependent	1.37364322222807e-33	5.16990298166379e-37	508	3295	643	5841	0.00%	0	YNL139C, YOR083W, YDL042C, YHR119W, YOL090W, YBR297W, YKL005C, YPL248C, YGR116W, YLR085C, YBR289W, YKL222C, YGL244W, YLL022C, YGR275W, YBR279W, YBL008W, YMR172W, YNL025C, YJL081C, YJL103C, YNL199C, YMR270C, YOR178C, YFR032C, YOR047C, YBR123C, YDL170W, YKL109W, YKR019C, YER064C, YIL084C, YOL017W, YPL015C, YPR031W, YPR065W, YHR167W, YGL013C, YLR384C, YGL209W, YOR380W, YLL029W, YPR068C, YMR223W, YLR…
GO:2001141	regulation of RNA biosynthetic process	1.37364322222807e-33	5.16990298166379e-37	508	3295	643	5841	0.00%	0	YNL139C, YOR083W, YDL042C, YHR119W, YOL090W, YBR297W, YKL005C, YPL248C, YGR116W, YLR085C, YBR289W, YKL222C, YGL244W, YLL022C, YGR275W, YBR279W, YBL008W, YMR172W, YNL025C, YJL081C, YJL103C, YNL199C, YMR270C, YOR178C, YFR032C, YOR047C, YBR123C, YDL170W, YKL109W, YKR019C, YER064C, YIL084C, YOL017W, YPL015C, YPR031W, YPR065W, YHR167W, YGL013C, YLR384C, YGL209W, YOR380W, YLL029W, YPR068C, YMR223W, YLR…
GO:0060255	regulation of macromolecule metabolic process	1.75731361296214e-33	6.61390144133286e-37	658	3295	871	5841	0.00%	0	YNL139C, YOR083W, YDL042C, YHR119W, YOL090W, YBR297W, YDR140W, YGR116W, YLR085C, YBR289W, YKL222C, YGL244W, YJL090C, YGR275W, YNL062C, YBL008W, YJL081C, YDL155W, YLR362W, YNL085W, YMR270C, YAL015C, YFR032C, YOR047C, YDR206W, YKL109W, YKR019C, YIL084C, YDL220C, YPR031W, YLR384C, YGL209W, YIL075C, YMR223W, YOR076C, YPL042C, YLR398C, YDR258C, YGL066W, YFL049W, YGR262C, YLR005W, YOR140W, YHR178W, YBR…
GO:0051252	regulation of RNA metabolic process	3.17998108675658e-33	1.19683142143642e-36	518	3295	659	5841	0.00%	0	YNL139C, YOR083W, YDL042C, YHR119W, YOL090W, YBR297W, YGR116W, YLR085C, YBR289W, YKL222C, YGL244W, YGR275W, YBL008W, YJL081C, YMR270C, YFR032C, YOR047C, YKL109W, YKR019C, YIL084C, YPR031W, YLR384C, YGL209W, YMR223W, YPL042C, YGL066W, YFL049W, YGR262C, YLR005W, YOR140W, YHR178W, YBR095C, YJL076W, YNL236W, YGL162W, YLR399C, YDR443C, YDR398W, YHR196W, YPR179C, YML051W, YHR071W, YNL330C, YOR032C, YML…
GO:0032774	RNA biosynthetic process	8.62755932534845e-32	3.24710550445933e-35	543	3295	701	5841	0.00%	0	YNL139C, YOR083W, YDL042C, YHR119W, YOL090W, YBR297W, YGR116W, YLR085C, YBR289W, YKL222C, YGL244W, YLR277C, YGR275W, YBL008W, YJL081C, YMR270C, YFR032C, YOR047C, YKL109W, YKR019C, YIL084C, YPR031W, YLR384C, YGL209W, YEL055C, YMR223W, YPL042C, YGL066W, YFL049W, YGR262C, YLR005W, YOR140W, YHR178W, YBR095C, YJL076W, YNL236W, YGL162W, YLR399C, YDR443C, YDR398W, YHR196W, YPR179C, YML051W, YHR071W, YNL…
GO:0006351	transcription, DNA-dependent	1.24935648387869e-31	4.7021320432017e-35	542	3295	700	5841	0.00%	0	YNL139C, YOR083W, YDL042C, YHR119W, YOL090W, YBR297W, YGR116W, YLR085C, YBR289W, YKL222C, YGL244W, YLR277C, YGR275W, YBL008W, YJL081C, YMR270C, YFR032C, YOR047C, YKL109W, YKR019C, YIL084C, YPR031W, YLR384C, YGL209W, YEL055C, YMR223W, YPL042C, YGL066W, YFL049W, YGR262C, YLR005W, YOR140W, YHR178W, YBR095C, YJL076W, YNL236W, YGL162W, YLR399C, YDR443C, YDR398W, YHR196W, YPR179C, YML051W, YHR071W, YNL…
GO:0009889	regulation of biosynthetic process	2.19356512616094e-30	8.25579648536297e-34	597	3295	788	5841	0.00%	0	YNL139C, YOR083W, YDL042C, YHR119W, YOL090W, YBR297W, YDR140W, YGR116W, YLR085C, YBR289W, YKL222C, YGL244W, YGR275W, YNL062C, YBL008W, YJL081C, YNL085W, YMR270C, YAL015C, YFR032C, YOR047C, YDR206W, YKL109W, YKR019C, YIL084C, YDL220C, YPR031W, YLR384C, YGL209W, YMR223W, YOR076C, YPL042C, YLR398C, YDR258C, YGL066W, YFL049W, YGR262C, YLR005W, YOR140W, YHR178W, YBR095C, YOR060C, YJL076W, YNL236W, YGL…
GO:0031326	regulation of cellular biosynthetic process	2.19356512616094e-30	8.25579648536297e-34	597	3295	788	5841	0.00%	0	YNL139C, YOR083W, YDL042C, YHR119W, YOL090W, YBR297W, YDR140W, YGR116W, YLR085C, YBR289W, YKL222C, YGL244W, YGR275W, YNL062C, YBL008W, YJL081C, YNL085W, YMR270C, YAL015C, YFR032C, YOR047C, YDR206W, YKL109W, YKR019C, YIL084C, YDL220C, YPR031W, YLR384C, YGL209W, YMR223W, YOR076C, YPL042C, YLR398C, YDR258C, YGL066W, YFL049W, YGR262C, YLR005W, YOR140W, YHR178W, YBR095C, YOR060C, YJL076W, YNL236W, YGL…
GO:2000112	regulation of cellular macromolecule biosynthetic process	3.00400033693546e-30	1.13059854608034e-33	583	3295	767	5841	0.00%	0	YNL139C, YOR083W, YDL042C, YHR119W, YOL090W, YBR297W, YDR140W, YGR116W, YLR085C, YBR289W, YKL222C, YGL244W, YGR275W, YNL062C, YBL008W, YJL081C, YNL085W, YMR270C, YAL015C, YFR032C, YOR047C, YDR206W, YKL109W, YKR019C, YIL084C, YDL220C, YPR031W, YLR384C, YGL209W, YMR223W, YOR076C, YPL042C, YLR398C, YDR258C, YGL066W, YFL049W, YGR262C, YLR005W, YOR140W, YHR178W, YBR095C, YOR060C, YJL076W, YNL236W, YGL…
GO:0010556	regulation of macromolecule biosynthetic process	1.12441243155866e-29	4.23188720947935e-33	583	3295	769	5841	0.00%	0	YNL139C, YOR083W, YDL042C, YHR119W, YOL090W, YBR297W, YDR140W, YGR116W, YLR085C, YBR289W, YKL222C, YGL244W, YGR275W, YNL062C, YBL008W, YJL081C, YNL085W, YMR270C, YAL015C, YFR032C, YOR047C, YDR206W, YKL109W, YKR019C, YIL084C, YDL220C, YPR031W, YLR384C, YGL209W, YMR223W, YOR076C, YPL042C, YLR398C, YDR258C, YGL066W, YFL049W, YGR262C, YLR005W, YOR140W, YHR178W, YBR095C, YOR060C, YJL076W, YNL236W, YGL…
GO:0007049	cell cycle	1.17705504915937e-28	4.43001523959114e-32	492	3295	634	5841	0.00%	0	YGL240W, YMR032W, YER059W, YOR083W, YKR072C, YLR035C, YKL203C, YOR181W, YLR319C, YJR089W, YOL090W, YDR218C, YMR308C, YBR057C, YGR116W, YLR320W, YLL003W, YAL009W, YER167W, YER016W, YJL090C, YPL219W, YBR279W, YLR190W, YGR238C, YNL025C, YOR299W, YOR057W, YDL155W, YLR381W, YPR111W, YER180C, YCR092C, YDR364C, YOR178C, YHL023C, YOR326W, YGL249W, YGL175C, YFR048W, YHR115C, YOR351C, YDR130C, YPL233W, YMR…
GO:0010468	regulation of gene expression	4.88013221311708e-28	1.83670764513251e-31	574	3295	761	5841	0.00%	0	YNL139C, YOR083W, YDL042C, YHR119W, YOL090W, YBR297W, YDR140W, YGR116W, YLR085C, YBR289W, YKL222C, YGL244W, YGR275W, YNL062C, YBL008W, YJL081C, YNL085W, YMR270C, YFR032C, YOR047C, YDR206W, YKL109W, YKR019C, YIL084C, YPR031W, YLR384C, YGL209W, YMR223W, YOR076C, YPL042C, YLR398C, YDR258C, YGL066W, YFL049W, YGR262C, YLR005W, YOR140W, YHR178W, YBR095C, YJL076W, YNL236W, YGL162W, YLR399C, YDR443C, YDR…
GO:0016043	cellular component organization	3.92536290180547e-26	1.47736654189141e-29	1130	3295	1665	5841	0.00%	0	YKL203C, YHR119W, YMR238W, YLR085C, YLL003W, YGL244W, YEL015W, YGR275W, YER166W, YCL048W, YGL236C, YJL081C, YHR194W, YCR092C, YIL115C, YMR012W, YHR115C, YAL015C, YBR163W, YER050C, YDR130C, YKR019C, YPR031W, YLR093C, YIL075C, YLR229C, YOR109W, YKR100C, YKL126W, YMR223W, YLR059C, YJR045C, YPR131C, YDR258C, YKR076W, YGL066W, YOR092W, YFL049W, YKR086W, YHR102W, YPR049C, YCL031C, YNL284C, YBR095C, YKL…
GO:0051716	cellular response to stimulus	2.21923915318611e-24	8.35242436276292e-28	610	3295	831	5841	0.00%	0	YMR032W, YNL139C, YNL242W, YLR035C, YKL203C, YDL042C, YHR119W, YOL090W, YDL105W, YGR116W, YPR095C, YBR289W, YGL244W, YJL090C, YDL234C, YNR044W, YML057W, YIL044C, YCR027C, YJL081C, YOR057W, YPL203W, YLR362W, YNL085W, YCR092C, YGR023W, YGL175C, YAL015C, YOR047C, YKL109W, YDR501W, YKR019C, YIL084C, YDL194W, YGL209W, YNL099C, YBR170C, YLR229C, YPL042C, YDL164C, YDR258C, YGL190C, YLR248W, YLR005W, YJL…
GO:0022402	cell cycle process	5.07189921905592e-24	1.90888190404815e-27	425	3295	548	5841	0.00%	0	YGL240W, YMR032W, YOR083W, YLR035C, YKL203C, YOR181W, YLR319C, YJR089W, YOL090W, YMR308C, YBR057C, YGR116W, YLR320W, YLL003W, YAL009W, YER167W, YER016W, YJL090C, YBR279W, YGR238C, YNL025C, YOR299W, YDL155W, YLR381W, YER180C, YCR092C, YDR364C, YOR178C, YHL023C, YOR326W, YGL249W, YGL175C, YFR048W, YHR115C, YOR351C, YDR130C, YPL233W, YMR153W, YBL051C, YDL194W, YMR198W, YIL106W, YLR229C, YLR361C, YDL…
GO:0090304	nucleic acid metabolic process	1.21456886653214e-23	4.57120386350071e-27	1007	3295	1475	5841	0.00%	0	YNL139C, YOR083W, YLR035C, YDL042C, YHR119W, YOL090W, YBR297W, YKL205W, YDL105W, YBR057C, YGR116W, YLR085C, YBR289W, YKL222C, YGL244W, YEL015W, YJL090C, YLR277C, YGR275W, YNL062C, YBL008W, YMR087W, YGL236C, YJL081C, YPL104W, YNL085W, YCR092C, YMR270C, YPL217C, YGL249W, YGL175C, YAL015C, YFR032C, YOR047C, YDR206W, YKL109W, YBR233W, YKR019C, YPL207W, YIL084C, YOR250C, YDL220C, YPR031W, YDR416W, YLR…
GO:0022403	cell cycle phase	1.67919539632151e-21	6.31989234595976e-25	342	3295	432	5841	0.00%	0	YGL240W, YMR032W, YOR083W, YLR035C, YKL203C, YJR089W, YOL090W, YMR308C, YBR057C, YGR116W, YLR320W, YLL003W, YAL009W, YER167W, YER016W, YJL090C, YBR279W, YGR238C, YNL025C, YDL155W, YLR381W, YER180C, YCR092C, YDR364C, YOR178C, YHL023C, YGL249W, YGL175C, YFR048W, YHR115C, YOR351C, YDR130C, YPL233W, YMR153W, YBL051C, YDL194W, YMR198W, YIL106W, YLR229C, YLR361C, YDL134C, YMR076C, YPL253C, YPL042C, YOR…
GO:0050896	response to stimulus	2.12845756913303e-21	8.010754870655e-25	756	3295	1077	5841	0.00%	0	YMR032W, YNL139C, YNL242W, YDR135C, YLR035C, YKL203C, YOR181W, YDL042C, YHR119W, YOL090W, YDL105W, YGR116W, YPR095C, YBR289W, YGL244W, YJL090C, YDL234C, YNR044W, YML057W, YIL044C, YCR027C, YJL081C, YOR057W, YPL203W, YLR362W, YNL085W, YHR204W, YCR092C, YGR023W, YGL175C, YAL015C, YGR177C, YOR047C, YKL109W, YDR501W, YKR019C, YER185W, YIL084C, YDL194W, YGL179C, YGL209W, YNL099C, YBR170C, YLR229C, YPL…
GO:0006366	transcription from RNA polymerase II promoter	4.11368693394901e-21	1.54824498831352e-24	327	3295	411	5841	0.00%	0	YNL139C, YOR083W, YHR119W, YKL005C, YPL248C, YGR116W, YGL244W, YLR277C, YGR275W, YBR279W, YBL008W, YMR172W, YNL025C, YJL081C, YNL199C, YOR178C, YOR047C, YDL170W, YKL109W, YIL084C, YPR065W, YHR167W, YGL013C, YLR384C, YGL209W, YLL029W, YPR068C, YLR266C, YPL042C, YKL116C, YKR099W, YOR338W, YOR290C, YDR217C, YGL066W, YFL049W, YIL046W, YDR421W, YGR262C, YFL031W, YLR005W, YMR263W, YOR140W, YHR178W, YHR…
GO:0071842	cellular component organization at cellular level	1.22630577315084e-20	4.61537739236295e-24	962	3295	1418	5841	0.00%	0	YMR032W, YLR429W, YNL242W, YKL203C, YOR181W, YDL042C, YHR119W, YJR089W, YOL090W, YGR116W, YLR085C, YLL003W, YBR289W, YGL244W, YER016W, YEL015W, YDL234C, YGR275W, YCL048W, YBL008W, YGL236C, YJL081C, YOR057W, YHR194W, YDL155W, YPL104W, YCR092C, YIL115C, YPL217C, YMR012W, YOL018C, YGL249W, YHR115C, YAL015C, YBR163W, YER050C, YDR130C, YBR233W, YPL233W, YIL084C, YDL220C, YPR031W, YDR416W, YGR099W, YLR…
GO:0006468	protein phosphorylation	2.18169928079383e-20	8.21113767705618e-24	172	3295	193	5841	0.00%	0	YKL168C, YER059W, YJL095W, YDR466W, YNL307C, YIL113W, YOL113W, YPL031C, YKL101W, YKL166C, YFL033C, YGR108W, YGL244W, YJL090C, YPL219W, YJL057C, YBR279W, YMR104C, YPR054W, YNL025C, YIL143C, YDR422C, YDL155W, YPL203W, YLR362W, YPR111W, YNL020C, YOR351C, YOL045W, YIL095W, YLR096W, YLR260W, YPL204W, YPL026C, YGL179C, YOL145C, YMR291W, YIL106W, YPR119W, YJR076C, YPL140C, YIL050W, YKL126W, YKL025C, YNR…
GO:0048523	negative regulation of cellular process	4.31457176444489e-20	1.62385087107448e-23	327	3295	414	5841	0.00%	0	YLR429W, YOR083W, YKL203C, YDL042C, YHR119W, YJR089W, YOL090W, YKL005C, YGR116W, YAL009W, YGL244W, YER016W, YJL090C, YLL022C, YPL219W, YBR279W, YGR238C, YNL025C, YOR178C, YHR115C, YOR351C, YDR206W, YOL045W, YDR130C, YKR019C, YBL051C, YIL084C, YOL017W, YDL194W, YPL015C, YPR065W, YGL209W, YLL029W, YDL134C, YKL126W, YNL261W, YPL042C, YKL116C, YGL190C, YMR219W, YDR217C, YFL031W, YMR263W, YOR140W, YLR…
GO:0048519	negative regulation of biological process	4.68736992644112e-20	1.76415879805838e-23	333	3295	423	5841	0.00%	0	YLR429W, YOR083W, YKL203C, YDL042C, YHR119W, YJR089W, YOL090W, YKL005C, YGR116W, YAL009W, YGL244W, YER016W, YJL090C, YLL022C, YPL219W, YBR279W, YGR238C, YNL025C, YOR178C, YHR115C, YOR351C, YDR206W, YOL045W, YDR130C, YKR019C, YBL051C, YIL084C, YOL017W, YDL194W, YPL015C, YPR065W, YGL209W, YLL029W, YDL134C, YKL126W, YNL261W, YPL042C, YNL197C, YKL116C, YGL190C, YMR219W, YDR217C, YFL031W, YMR263W, YOR…
GO:0006357	regulation of transcription from RNA polymerase II promoter	1.4548074458365e-19	5.47537616046858e-23	270	3295	332	5841	0.00%	0	YOR083W, YHR119W, YKL005C, YPL248C, YGR116W, YGL244W, YBR279W, YBL008W, YMR172W, YNL025C, YJL081C, YNL199C, YOR178C, YOR047C, YDL170W, YKL109W, YIL084C, YPR065W, YGL013C, YLR384C, YGL209W, YLL029W, YPR068C, YLR266C, YPL042C, YKL116C, YOR338W, YOR290C, YDR217C, YGL066W, YFL049W, YIL046W, YDR421W, YGR262C, YFL031W, YLR005W, YMR263W, YOR140W, YHR178W, YHR006W, YBR095C, YNL236W, YGL162W, YPL101W, YDR…
GO:0006139	nucleobase-containing compound metabolic process	6.19401392044438e-19	2.33120584134151e-22	1163	3295	1765	5841	0.00%	0	YHR119W, YKL205W, YBR057C, YLR085C, YKL222C, YGL244W, YEL015W, YGR275W, YNL062C, YGL236C, YJL081C, YCR092C, YGL175C, YAL015C, YFR032C, YOR047C, YKL109W, YML075C, YKR019C, YPL207W, YOR250C, YPR031W, YLR384C, YMR223W, YDL164C, YLR059C, YGL066W, YFL049W, YKR086W, YDL112W, YJL005W, YLR323C, YCL031C, YBR095C, YJL076W, YNL236W, YER032W, YPL270W, YLR399C, YKL014C, YJL098W, YHR196W, YPR179C, YML051W, YJR…
GO:0006996	organelle organization	5.86904614052825e-18	2.2088995636162e-21	820	3295	1200	5841	0.00%	0	YMR032W, YLR429W, YNL242W, YKL203C, YOR181W, YDL042C, YHR119W, YJR089W, YOL090W, YGR116W, YLR085C, YLL003W, YBR289W, YGL244W, YER016W, YDL234C, YGR275W, YBL008W, YGL236C, YJL081C, YOR057W, YHR194W, YDL155W, YPL104W, YCR092C, YIL115C, YPL217C, YMR012W, YOL018C, YGL249W, YHR115C, YAL015C, YBR163W, YER050C, YDR130C, YBR233W, YPL233W, YIL084C, YDL220C, YPR031W, YGR099W, YLR093C, YPR083W, YLR229C, YGL…
GO:0000278	mitotic cell cycle	1.84389650168627e-16	6.93976854228931e-20	258	3295	323	5841	0.00%	0	YGL240W, YMR032W, YOR083W, YKR072C, YKL203C, YJR089W, YMR308C, YGR116W, YLL003W, YER167W, YER016W, YJL090C, YBR279W, YGR238C, YDL155W, YLR381W, YDR364C, YOR178C, YOR326W, YHR115C, YDR130C, YPL233W, YMR153W, YBL051C, YMR198W, YIL106W, YLR229C, YLR361C, YDL134C, YMR076C, YPL253C, YOR269W, YLR045C, YDL164C, YDR113C, YGL190C, YDR217C, YIL046W, YIL122W, YMR048W, YAL047C, YOR262W, YJR112W, YJL076W, YDR…
GO:0044260	cellular macromolecule metabolic process	5.80761113538797e-16	2.18577761964169e-19	1518	3295	2396	5841	0.00%	0	YKL168C, YHR119W, YMR237W, YDR140W, YKL205W, YBR057C, YLR085C, YKL222C, YGL244W, YEL015W, YGR275W, YNL062C, YGL236C, YJL081C, YLR362W, YCR092C, YMR012W, YGL257C, YGL175C, YHR115C, YAL015C, YFR032C, YOR047C, YER050C, YKL109W, YKR019C, YPL207W, YOR250C, YGL179C, YPR031W, YJL162C, YLR384C, YIL075C, YDR430C, YDL040C, YKL126W, YMR223W, YDL164C, YLR059C, YJR045C, YPR131C, YDR258C, YLR248W, YGL066W, YFL…
GO:0043170	macromolecule metabolic process	1.39603480826841e-15	5.25417692235004e-19	1561	3295	2474	5841	0.00%	0	YKL168C, YHR119W, YMR237W, YDR140W, YKL205W, YBR057C, YLR085C, YKL222C, YGL244W, YEL015W, YGR275W, YNL062C, YGL236C, YJL081C, YLR362W, YCR092C, YMR012W, YGL257C, YGL175C, YHR115C, YAL015C, YFR032C, YOR047C, YER050C, YKL109W, YKR019C, YPL207W, YOR250C, YGL179C, YPR031W, YJL162C, YLR384C, YIL075C, YDR430C, YDL040C, YKL126W, YMR223W, YDL164C, YLR059C, YJR045C, YPR131C, YDR258C, YLR248W, YGL066W, YFL…
GO:0007154	cell communication	1.9256861658014e-15	7.24759565600829e-19	305	3295	396	5841	0.00%	0	YDL035C, YNL242W, YKL203C, YLR319C, YPL248C, YGR116W, YPR095C, YKL166C, YOR360C, YML104C, YDL234C, YML057W, YIL044C, YCR027C, YNL025C, YOR057W, YOR106W, YPL203W, YMR004W, YLR362W, YGR023W, YHL023C, YOR047C, YDL170W, YOL045W, YKL109W, YKR055W, YLR260W, YKR019C, YDL194W, YGL209W, YPL140C, YLR229C, YLR361C, YPL042C, YFL026W, YGL190C, YLR248W, YFL031W, YIL122W, YJL005W, YDL006W, YOR134W, YKL190W, YDR…
GO:0071840	cellular component organization or biogenesis	4.99438693937616e-15	1.87970904756348e-18	1238	3295	1921	5841	0.00%	0	YKL203C, YHR119W, YMR237W, YMR238W, YLR085C, YLL003W, YGL244W, YEL015W, YGR275W, YER166W, YCL048W, YGL236C, YJL081C, YHR194W, YLR362W, YCR092C, YIL115C, YMR012W, YHR115C, YAL015C, YBR163W, YER050C, YDR130C, YKR019C, YPR031W, YLR093C, YIL075C, YLR229C, YOR109W, YKR100C, YKL126W, YMR223W, YLR059C, YJR045C, YPR131C, YDR258C, YKR076W, YGL066W, YOR092W, YFL049W, YKR086W, YHR102W, YPR049C, YCL031C, YNL…
GO:0043412	macromolecule modification	5.08114396351117e-15	1.91236129601474e-18	511	3295	717	5841	0.00%	0	YGL240W, YKL168C, YDL190C, YER059W, YDL042C, YHR119W, YDR221W, YMR308C, YDR140W, YGR116W, YOR149C, YKL166C, YGL244W, YJL090C, YLL022C, YPL219W, YDL122W, YBR279W, YNL062C, YMR104C, YIL071C, YNL025C, YGL236C, YJL081C, YOR057W, YDL155W, YPL203W, YLR362W, YLR032W, YPR111W, YDR331W, YGL257C, YNL020C, YHR115C, YOR351C, YOL045W, YLR096W, YLR260W, YMR153W, YPL207W, YIL084C, YNL038W, YPL015C, YGL179C, YPR…
GO:0016070	RNA metabolic process	6.13919611162234e-15	2.310574373964e-18	822	3295	1222	5841	0.00%	0	YNL139C, YOR083W, YDL042C, YHR119W, YOL090W, YBR297W, YKL205W, YGR116W, YLR085C, YBR289W, YKL222C, YGL244W, YEL015W, YLR277C, YGR275W, YNL062C, YBL008W, YMR087W, YGL236C, YJL081C, YPL104W, YMR270C, YPL217C, YFR032C, YOR047C, YDR206W, YKL109W, YKR019C, YPL207W, YIL084C, YOR250C, YPR031W, YDR416W, YLR384C, YGL209W, YNR015W, YOR243C, YEL055C, YBR065C, YMR223W, YOR076C, YPL042C, YDR151C, YLR398C, YLR…
GO:0051276	chromosome organization	6.80891187199089e-15	2.56263149115201e-18	315	3295	413	5841	0.00%	0	YGL240W, YDL042C, YLR319C, YHR119W, YJR089W, YOL090W, YGR116W, YLR085C, YLR320W, YBR289W, YGL244W, YER016W, YLL022C, YGR275W, YBR279W, YBL008W, YJL081C, YOR057W, YLR381W, YCR092C, YGL249W, YDR130C, YBR233W, YIL084C, YDL220C, YPR031W, YMR198W, YGR099W, YGL092W, YPR068C, YOR098C, YMR223W, YMR076C, YPL253C, YDR113C, YOR290C, YGL066W, YFL049W, YGR262C, YMR094W, YMR263W, YLR052W, YPL254W, YNL339C, YMR…
GO:0006464	protein modification process	7.60379960563609e-15	2.86179887302826e-18	463	3295	642	5841	0.00%	0	YGL240W, YKL168C, YDL190C, YER059W, YDL042C, YHR119W, YDR221W, YMR308C, YDR140W, YGR116W, YOR149C, YKL166C, YGL244W, YJL090C, YLL022C, YPL219W, YDL122W, YBR279W, YMR104C, YIL071C, YNL025C, YJL081C, YOR057W, YDL155W, YPL203W, YLR362W, YLR032W, YPR111W, YDR331W, YGL257C, YNL020C, YHR115C, YOR351C, YOL045W, YLR096W, YLR260W, YMR153W, YIL084C, YNL038W, YPL015C, YGL179C, YPR031W, YIL106W, YNL099C, YPL…
GO:0000279	M phase	1.05055540854754e-14	3.95391572656205e-18	276	3295	355	5841	0.00%	0	YGL240W, YMR032W, YLR035C, YJR089W, YOL090W, YMR308C, YBR057C, YLR320W, YLL003W, YAL009W, YER016W, YGR238C, YNL025C, YDL155W, YLR381W, YER180C, YCR092C, YOR178C, YHL023C, YGL249W, YGL175C, YFR048W, YHR115C, YOR351C, YDR130C, YPL233W, YMR153W, YDL194W, YMR198W, YIL106W, YLR229C, YDL134C, YMR076C, YPL253C, YPL042C, YOR269W, YLR045C, YDR113C, YKR099W, YGL190C, YLR248W, YIL046W, YFL031W, YIL122W, YMR…
GO:0006259	DNA metabolic process	4.2808877206487e-14	1.61117339881396e-17	338	3295	451	5841	0.00%	0	YGL240W, YBR223C, YNL139C, YER162C, YLR035C, YDL042C, YHR119W, YOL090W, YDL105W, YBR057C, YGR116W, YLR320W, YBR289W, YGL244W, YJL090C, YLL022C, YDR489W, YBR279W, YBL008W, YJL081C, YLR381W, YNL085W, YLR032W, YCR092C, YGL249W, YGL175C, YDR317W, YAL015C, YBR233W, YPL015C, YDL220C, YHR167W, YGR099W, YMR076C, YNL261W, YDL164C, YDR113C, YKR099W, YOR290C, YDR217C, YIL046W, YGR262C, YLR005W, YLR052W, YNL…
GO:0048518	positive regulation of biological process	5.79118981570869e-14	2.17959722081622e-17	265	3295	341	5841	0.00%	0	YGL240W, YLR429W, YKL203C, YOR181W, YDL042C, YLR319C, YHR119W, YPL248C, YGR116W, YPR095C, YBR289W, YER167W, YGL244W, YER016W, YJL090C, YBR279W, YMR172W, YNL025C, YDL155W, YNL085W, YNL199C, YAL015C, YDL170W, YKL109W, YKR055W, YIL084C, YPL015C, YGL013C, YGL209W, YLR229C, YPR068C, YLR266C, YPL042C, YDR258C, YOR338W, YOR290C, YDR217C, YGL066W, YFL049W, YDR421W, YGR262C, YFL031W, YMR263W, YOR140W, YHR…
GO:0048522	positive regulation of cellular process	2.28390710009596e-13	8.59581144183651e-17	259	3295	334	5841	0.00%	0	YGL240W, YLR429W, YKL203C, YOR181W, YDL042C, YLR319C, YHR119W, YPL248C, YGR116W, YPR095C, YBR289W, YGL244W, YER016W, YJL090C, YBR279W, YMR172W, YNL025C, YDL155W, YNL085W, YNL199C, YAL015C, YDL170W, YKL109W, YKR055W, YIL084C, YPL015C, YGL013C, YGL209W, YLR229C, YPR068C, YLR266C, YPL042C, YDR258C, YOR338W, YOR290C, YDR217C, YGL066W, YFL049W, YDR421W, YGR262C, YFL031W, YMR263W, YOR140W, YHR006W, YBR…
GO:0006807	nitrogen compound metabolic process	8.19678760075997e-13	3.08497839697402e-16	1302	3295	2049	5841	0.00%	0	YHR119W, YMR237W, YKL205W, YBR057C, YLR085C, YHR033W, YKL222C, YFL030W, YPR121W, YGL244W, YEL015W, YGR275W, YNL062C, YGL236C, YJL081C, YCR092C, YGL175C, YAL015C, YFR032C, YOR047C, YKL109W, YML075C, YKR019C, YPL207W, YOR250C, YPR031W, YLR384C, YMR223W, YDL164C, YLR059C, YKR076W, YGL066W, YFL049W, YKR086W, YDL112W, YJL005W, YLR323C, YCL031C, YBR095C, YJL076W, YNL236W, YER032W, YPL270W, YLR399C, YKL…
GO:0023052	signaling	1.59670094696678e-12	6.00941267206164e-16	233	3295	298	5841	0.00%	0	YDL035C, YJL095W, YKL203C, YDR466W, YIL113W, YHL020C, YLR319C, YLR305C, YHR206W, YPL031C, YPR095C, YKL051W, YKL166C, YOR360C, YNL180C, YFL033C, YDL240W, YNL127W, YDL234C, YOR014W, YML057W, YIL044C, YCR027C, YOR057W, YDR422C, YPL203W, YLR362W, YNL201C, YHL023C, YLR452C, YDR277C, YOR047C, YPL161C, YOL045W, YNL305C, YKR055W, YLR260W, YPL242C, YKR019C, YOR070C, YBL060W, YDL194W, YBR077C, YOR353C, YER…
GO:0034641	cellular nitrogen compound metabolic process	4.12732145356057e-12	1.55337653502468e-15	1281	3295	2019	5841	0.00%	0	YHR119W, YKL205W, YBR057C, YLR085C, YHR033W, YKL222C, YFL030W, YPR121W, YGL244W, YEL015W, YGR275W, YNL062C, YGL236C, YJL081C, YCR092C, YGL175C, YAL015C, YFR032C, YOR047C, YKL109W, YML075C, YKR019C, YPL207W, YOR250C, YPR031W, YLR384C, YMR223W, YDL164C, YLR059C, YKR076W, YGL066W, YFL049W, YKR086W, YDL112W, YJL005W, YLR323C, YCL031C, YBR095C, YJL076W, YNL236W, YER032W, YPL270W, YLR399C, YKL014C, YJL…
GO:0007165	signal transduction	4.46266947553857e-12	1.67958956550191e-15	228	3295	292	5841	0.00%	0	YDL035C, YJL095W, YKL203C, YDR466W, YIL113W, YHL020C, YLR319C, YLR305C, YHR206W, YPL031C, YPR095C, YKL051W, YKL166C, YOR360C, YNL180C, YFL033C, YDL240W, YNL127W, YDL234C, YOR014W, YML057W, YIL044C, YCR027C, YOR057W, YDR422C, YPL203W, YLR362W, YNL201C, YHL023C, YLR452C, YDR277C, YOR047C, YPL161C, YOL045W, YNL305C, YKR055W, YLR260W, YPL242C, YKR019C, YOR070C, YBL060W, YDL194W, YBR077C, YOR353C, YER…
GO:0051726	regulation of cell cycle	6.33338638684909e-12	2.38366066497896e-15	157	3295	189	5841	0.00%	0	YGL240W, YER059W, YJL168C, YKR072C, YKL203C, YJR089W, YOL090W, YMR308C, YBR186W, YKR029C, YKL101W, YFL033C, YGR108W, YER167W, YER016W, YJR053W, YJL090C, YPL219W, YOR014W, YGR238C, YNL025C, YOR057W, YDL188C, YDL155W, YNL201C, YOR178C, YBL046W, YHR115C, YMR168C, YOR351C, YLR288C, YDR130C, YMR153W, YBL051C, YDL194W, YDL102W, YGL116W, YIL106W, YPR119W, YLR229C, YIL050W, YLR361C, YDL134C, YDR303C, YIL…
GO:0010628	positive regulation of gene expression	1.14137276516874e-11	4.29571985385297e-15	174	3295	214	5841	0.00%	0	YPL126W, YPR009W, YDL042C, YHL020C, YBR020W, YPL248C, YGR116W, YAL051W, YIL131C, YBR289W, YER167W, YER111C, YMR172W, YCL010C, YNL025C, YNL199C, YMR070W, YDL170W, YKL109W, YBL005W, YIR018W, YIL084C, YPR070W, YPL026C, YPL015C, YGR163W, YGL013C, YPL230W, YGL209W, YNL097C, YPR068C, YLR266C, YPL042C, YFL021W, YOR338W, YOR290C, YDR217C, YGL066W, YDR207C, YFL049W, YDR421W, YGR262C, YFL031W, YMR263W, YOR…
GO:0045934	negative regulation of nucleobase-containing compound metabolic process	1.1957968116494e-11	4.50055254666692e-15	198	3295	249	5841	0.00%	0	YML113W, YOR083W, YJL168C, YDL042C, YHL020C, YHR119W, YOL090W, YKL005C, YPL031C, YGR116W, YAL051W, YAR003W, YIR002C, YIL131C, YNL206C, YOR144C, YGL244W, YLL022C, YBR279W, YNL025C, YLR335W, YMR070W, YBL052C, YBR050C, YOR178C, YPL001W, YLR288C, YIR018W, YKR019C, YIL084C, YOL017W, YGR280C, YDR448W, YPR070W, YLR417W, YPL015C, YOL145C, YPL008W, YPR065W, YGL209W, YNL097C, YLL029W, YLR103C, YNL261W, YPL…
GO:0051172	negative regulation of nitrogen compound metabolic process	1.1957968116494e-11	4.50055254666692e-15	198	3295	249	5841	0.00%	0	YML113W, YOR083W, YJL168C, YDL042C, YHL020C, YHR119W, YOL090W, YKL005C, YPL031C, YGR116W, YAL051W, YAR003W, YIR002C, YIL131C, YNL206C, YOR144C, YGL244W, YLL022C, YBR279W, YNL025C, YLR335W, YMR070W, YBL052C, YBR050C, YOR178C, YPL001W, YLR288C, YIR018W, YKR019C, YIL084C, YOL017W, YGR280C, YDR448W, YPR070W, YLR417W, YPL015C, YOL145C, YPL008W, YPR065W, YGL209W, YNL097C, YLL029W, YLR103C, YNL261W, YPL…
GO:0045893	positive regulation of transcription, DNA-dependent	1.67686254770667e-11	6.31111233611845e-15	173	3295	213	5841	0.00%	0	YPL126W, YPR009W, YDL042C, YHL020C, YBR020W, YPL248C, YGR116W, YAL051W, YIL131C, YBR289W, YER111C, YMR172W, YCL010C, YNL025C, YNL199C, YMR070W, YDL170W, YKL109W, YBL005W, YIR018W, YIL084C, YPR070W, YPL026C, YPL015C, YGR163W, YGL013C, YPL230W, YGL209W, YNL097C, YPR068C, YLR266C, YPL042C, YFL021W, YOR338W, YOR290C, YDR217C, YGL066W, YDR207C, YFL049W, YDR421W, YGR262C, YFL031W, YMR263W, YOR140W, YHR…
GO:0009893	positive regulation of metabolic process	1.82246057806142e-11	6.85909137396092e-15	228	3295	294	5841	0.00%	0	YGL240W, YPL126W, YPR009W, YJL168C, YDL042C, YHL020C, YHR119W, YBR020W, YHR086W, YPL248C, YPL031C, YGR116W, YAL051W, YIL131C, YBR289W, YER167W, YER111C, YGL244W, YJL090C, YBR279W, YMR172W, YCL010C, YNL025C, YNL085W, YNL199C, YMR070W, YAL015C, YDL170W, YKL109W, YBL005W, YIR018W, YIL084C, YBL060W, YDR448W, YPR070W, YPL026C, YPL015C, YOL145C, YGR163W, YGL013C, YPL230W, YGL116W, YGL209W, YNL097C, YPR…
GO:0051254	positive regulation of RNA metabolic process	2.52389659880509e-11	9.49904628831424e-15	183	3295	228	5841	0.00%	0	YPL126W, YPR009W, YDL042C, YHL020C, YBR020W, YHR086W, YPL248C, YGR116W, YAL051W, YIL131C, YBR289W, YER111C, YGL244W, YBR279W, YMR172W, YCL010C, YNL025C, YNL199C, YMR070W, YDL170W, YKL109W, YBL005W, YIR018W, YIL084C, YPR070W, YPL026C, YPL015C, YOL145C, YGR163W, YGL013C, YPL230W, YGL209W, YNL097C, YPR068C, YLR266C, YPL042C, YFL021W, YOR338W, YOR290C, YDR217C, YGL066W, YDR207C, YFL049W, YDR421W, YGR…
GO:0031325	positive regulation of cellular metabolic process	2.53976416455559e-11	9.55876614435674e-15	225	3295	290	5841	0.00%	0	YGL240W, YPL126W, YPR009W, YJL168C, YDL042C, YHL020C, YHR119W, YBR020W, YHR086W, YPL248C, YPL031C, YGR116W, YAL051W, YIL131C, YBR289W, YER111C, YGL244W, YJL090C, YBR279W, YMR172W, YCL010C, YNL025C, YNL085W, YNL199C, YMR070W, YAL015C, YDL170W, YKL109W, YBL005W, YIR018W, YIL084C, YBL060W, YDR448W, YPR070W, YPL026C, YPL015C, YOL145C, YGR163W, YGL013C, YPL230W, YGL116W, YGL209W, YNL097C, YPR068C, YLR…
GO:0071841	cellular component organization or biogenesis at cellular level	3.75876340492204e-11	1.41466443542418e-14	1146	3295	1796	5841	0.00%	0	YKL203C, YHR119W, YMR237W, YMR238W, YLR085C, YLL003W, YGL244W, YEL015W, YGR275W, YCL048W, YGL236C, YJL081C, YHR194W, YLR362W, YCR092C, YIL115C, YMR012W, YHR115C, YAL015C, YBR163W, YER050C, YDR130C, YKR019C, YPR031W, YLR093C, YIL075C, YLR229C, YKR100C, YKL126W, YMR223W, YLR059C, YJR045C, YPR131C, YDR258C, YKR076W, YGL066W, YOR092W, YFL049W, YKR086W, YHR102W, YPR049C, YCL031C, YNL284C, YBR095C, YKL…
GO:0048583	regulation of response to stimulus	4.62365176441074e-11	1.74017755529196e-14	109	3295	124	5841	0.00%	0	YGL073W, YIL113W, YNL293W, YHR205W, YLR431C, YPL031C, YPR095C, YLR425W, YPL256C, YGL244W, YNL127W, YBR140C, YGL181W, YDL234C, YPL115C, YBR279W, YML057W, YIL044C, YER107C, YNL218W, YBL056W, YMR218C, YDL020C, YNL201C, YER124C, YHL023C, YBL046W, YDR373W, YLR452C, YBL005W, YPL242C, YOR070C, YBL060W, YLR433C, YOL145C, YER122C, YGL013C, YBR276C, YDR183W, YHL029C, YLR229C, YGL194C, YDL216C, YAL041W, YOL…
GO:0051173	positive regulation of nitrogen compound metabolic process	6.66289461396259e-11	2.5076758050292e-14	189	3295	238	5841	0.00%	0	YPL126W, YPR009W, YDL042C, YHL020C, YBR020W, YHR086W, YPL248C, YGR116W, YAL051W, YIL131C, YBR289W, YER111C, YGL244W, YBR279W, YMR172W, YCL010C, YNL025C, YNL199C, YMR070W, YAL015C, YDL170W, YKL109W, YBL005W, YIR018W, YIL084C, YPR070W, YPL026C, YPL015C, YOL145C, YGR163W, YGL013C, YPL230W, YGL209W, YNL097C, YPR068C, YLR266C, YPL042C, YFL021W, YOR338W, YOR290C, YDR217C, YGL066W, YDR207C, YFL049W, YDR…
GO:0010604	positive regulation of macromolecule metabolic process	6.92737133768647e-11	2.60721540748456e-14	218	3295	281	5841	0.00%	0	YGL240W, YPL126W, YPR009W, YJL168C, YDL042C, YHL020C, YHR119W, YBR020W, YHR086W, YPL248C, YGR116W, YAL051W, YIL131C, YBR289W, YER167W, YER111C, YGL244W, YJL090C, YBR279W, YMR172W, YCL010C, YNL025C, YNL085W, YNL199C, YMR070W, YAL015C, YDL170W, YKL109W, YBL005W, YIR018W, YIL084C, YDR448W, YPR070W, YPL026C, YPL015C, YOL145C, YGR163W, YGL013C, YPL230W, YGL116W, YGL209W, YNL097C, YPR068C, YLR266C, YPL…
GO:0045935	positive regulation of nucleobase-containing compound metabolic process	9.56787289039274e-11	3.60100598057687e-14	188	3295	237	5841	0.00%	0	YPL126W, YPR009W, YDL042C, YHL020C, YBR020W, YHR086W, YPL248C, YGR116W, YAL051W, YIL131C, YBR289W, YER111C, YGL244W, YBR279W, YMR172W, YCL010C, YNL025C, YNL199C, YMR070W, YAL015C, YDL170W, YKL109W, YBL005W, YIR018W, YIL084C, YPR070W, YPL026C, YPL015C, YOL145C, YGR163W, YGL013C, YPL230W, YGL209W, YNL097C, YPR068C, YLR266C, YPL042C, YFL021W, YOR338W, YOR290C, YDR217C, YGL066W, YDR207C, YFL049W, YDR…
GO:0009890	negative regulation of biosynthetic process	1.32312479745175e-10	4.97976965544507e-14	210	3295	270	5841	0.00%	0	YML113W, YOR083W, YJL168C, YDL042C, YHL020C, YHR119W, YOL090W, YKL005C, YPL031C, YGR116W, YAL051W, YAR003W, YIL131C, YAL009W, YNL206C, YGL244W, YLL022C, YPL219W, YBR279W, YNL025C, YLR335W, YMR070W, YBL052C, YBR050C, YOR178C, YPL001W, YCR077C, YDR206W, YOL045W, YLR288C, YIR018W, YKR019C, YIL084C, YOL017W, YGR280C, YDR448W, YPR070W, YLR417W, YPL015C, YOL145C, YPR065W, YGL209W, YNL097C, YHR004C, YLL…
GO:0031327	negative regulation of cellular biosynthetic process	1.32312479745175e-10	4.97976965544507e-14	210	3295	270	5841	0.00%	0	YML113W, YOR083W, YJL168C, YDL042C, YHL020C, YHR119W, YOL090W, YKL005C, YPL031C, YGR116W, YAL051W, YAR003W, YIL131C, YAL009W, YNL206C, YGL244W, YLL022C, YPL219W, YBR279W, YNL025C, YLR335W, YMR070W, YBL052C, YBR050C, YOR178C, YPL001W, YCR077C, YDR206W, YOL045W, YLR288C, YIR018W, YKR019C, YIL084C, YOL017W, YGR280C, YDR448W, YPR070W, YLR417W, YPL015C, YOL145C, YPR065W, YGL209W, YNL097C, YHR004C, YLL…
GO:0045892	negative regulation of transcription, DNA-dependent	2.44347990689864e-10	9.19638655212132e-14	179	3295	225	5841	0.00%	0	YML113W, YOR083W, YJL168C, YDL042C, YHL020C, YHR119W, YOL090W, YKL005C, YPL031C, YGR116W, YAL051W, YAR003W, YIL131C, YNL206C, YGL244W, YLL022C, YBR279W, YNL025C, YLR335W, YMR070W, YBL052C, YBR050C, YOR178C, YPL001W, YLR288C, YIR018W, YKR019C, YIL084C, YOL017W, YDR448W, YPR070W, YLR417W, YPL015C, YOL145C, YPR065W, YGL209W, YNL097C, YLL029W, YLR103C, YNL261W, YPL042C, YPL049C, YKL116C, YGR122W, YMR…
GO:0016310	phosphorylation	2.61821618422875e-10	9.85403155524557e-14	230	3295	301	5841	0.00%	0	YKL168C, YER059W, YJL095W, YKL203C, YPL188W, YDR466W, YNL307C, YIL113W, YLR305C, YOL113W, YGL119W, YBR020W, YPL031C, YKL101W, YKL166C, YHR033W, YFL053W, YFL033C, YGR108W, YDR315C, YGL244W, YJL090C, YPL219W, YJL057C, YBR279W, YMR104C, YPR054W, YNL025C, YIL143C, YEL041W, YDR422C, YDL155W, YPL203W, YLR362W, YJL103C, YPR111W, YDR196C, YOL055C, YNL020C, YOR351C, YOL045W, YIL095W, YLR096W, YLR260W, YDR…
GO:0031324	negative regulation of cellular metabolic process	3.69641852529683e-10	1.39120004715725e-13	225	3295	294	5841	0.00%	0	YML113W, YOR083W, YJL168C, YKL203C, YDL042C, YHL020C, YHR119W, YOL090W, YKL005C, YPL031C, YGR116W, YAL051W, YAR003W, YIR002C, YIL131C, YAL009W, YNL206C, YOR144C, YGL244W, YLL022C, YPL219W, YBR279W, YNL025C, YLR335W, YMR070W, YBL052C, YBR050C, YOR178C, YPL001W, YCR077C, YDR206W, YOL045W, YLR288C, YIR018W, YKR019C, YIL084C, YOL017W, YGR280C, YDR448W, YPR070W, YLR417W, YPL015C, YOL145C, YPL008W, YPR…
GO:0010629	negative regulation of gene expression	3.85696092496204e-10	1.45162247834477e-13	182	3295	230	5841	0.00%	0	YML113W, YOR083W, YJL168C, YDL042C, YHL020C, YHR119W, YOL113W, YOL090W, YKL005C, YPL031C, YGR116W, YAL051W, YAR003W, YIL131C, YNL206C, YGL244W, YLL022C, YBR279W, YNL025C, YLR335W, YMR070W, YBL052C, YBR050C, YOR178C, YPL001W, YLR288C, YIR018W, YKR019C, YIL084C, YOL017W, YDR448W, YPR070W, YLR417W, YPL015C, YOL145C, YPR065W, YGL209W, YNL097C, YLL029W, YLR103C, YNL261W, YPL042C, YPL049C, YKL116C, YGR…
GO:0009892	negative regulation of metabolic process	5.0149602294817e-10	1.88745209991784e-13	228	3295	299	5841	0.00%	0	YML113W, YOR083W, YJL168C, YKL203C, YDL042C, YHL020C, YHR119W, YOL113W, YOL090W, YKL005C, YPL031C, YGR116W, YAL051W, YAR003W, YIR002C, YIL131C, YAL009W, YNL206C, YOR144C, YGL244W, YLL022C, YPL219W, YBR279W, YNL025C, YLR335W, YMR070W, YBL052C, YBR050C, YOR178C, YPL001W, YCR077C, YDR206W, YOL045W, YLR288C, YIR018W, YKR019C, YIL084C, YOL017W, YGR280C, YDR448W, YPR070W, YLR417W, YPL015C, YOL145C, YPL…
GO:0051253	negative regulation of RNA metabolic process	5.28357570828942e-10	1.98854938211871e-13	179	3295	226	5841	0.00%	0	YML113W, YOR083W, YJL168C, YDL042C, YHL020C, YHR119W, YOL090W, YKL005C, YPL031C, YGR116W, YAL051W, YAR003W, YIL131C, YNL206C, YGL244W, YLL022C, YBR279W, YNL025C, YLR335W, YMR070W, YBL052C, YBR050C, YOR178C, YPL001W, YLR288C, YIR018W, YKR019C, YIL084C, YOL017W, YDR448W, YPR070W, YLR417W, YPL015C, YOL145C, YPR065W, YGL209W, YNL097C, YLL029W, YLR103C, YNL261W, YPL042C, YPL049C, YKL116C, YGR122W, YMR…
GO:0006974	response to DNA damage stimulus	6.82981609403917e-10	2.57049909448219e-13	229	3295	301	5841	0.00%	0	YOR386W, YBR223C, YMR032W, YNL139C, YER162C, YPR019W, YLR035C, YNL307C, YDL042C, YOL090W, YDL200C, YPL031C, YDL105W, YIR002C, YLR320W, YPR180W, YBR289W, YOR144C, YBR073W, YGL244W, YJL090C, YLR383W, YDR489W, YBR279W, YJL081C, YMR078C, YIL143C, YNL085W, YLR032W, YCR092C, YNL201C, YGR056W, YBL046W, YKL213C, YGL175C, YPL001W, YDR317W, YAL015C, YER041W, YLR288C, YDR501W, YOL095C, YDR419W, YPL204W, YLR…
GO:0010558	negative regulation of macromolecule biosynthetic process	7.01559064556353e-10	2.64041800736302e-13	199	3295	256	5841	0.00%	0	YML113W, YOR083W, YJL168C, YDL042C, YHL020C, YHR119W, YOL090W, YKL005C, YPL031C, YGR116W, YAL051W, YAR003W, YIL131C, YNL206C, YGL244W, YLL022C, YPL219W, YBR279W, YNL025C, YLR335W, YMR070W, YBL052C, YBR050C, YOR178C, YPL001W, YCR077C, YDR206W, YOL045W, YLR288C, YIR018W, YKR019C, YIL084C, YOL017W, YGR280C, YDR448W, YPR070W, YLR417W, YPL015C, YOL145C, YPR065W, YGL209W, YNL097C, YLL029W, YLR103C, YNL…
GO:2000113	negative regulation of cellular macromolecule biosynthetic process	7.01559064556353e-10	2.64041800736302e-13	199	3295	256	5841	0.00%	0	YML113W, YOR083W, YJL168C, YDL042C, YHL020C, YHR119W, YOL090W, YKL005C, YPL031C, YGR116W, YAL051W, YAR003W, YIL131C, YNL206C, YGL244W, YLL022C, YPL219W, YBR279W, YNL025C, YLR335W, YMR070W, YBL052C, YBR050C, YOR178C, YPL001W, YCR077C, YDR206W, YOL045W, YLR288C, YIR018W, YKR019C, YIL084C, YOL017W, YGR280C, YDR448W, YPR070W, YLR417W, YPL015C, YOL145C, YPR065W, YGL209W, YNL097C, YLL029W, YLR103C, YNL…
GO:0010564	regulation of cell cycle process	7.86429656346444e-10	2.95984063359595e-13	121	3295	143	5841	0.00%	0	YGL240W, YLR210W, YAR019C, YJL168C, YJR089W, YOL090W, YMR308C, YBR186W, YKR029C, YKL101W, YER173W, YFL033C, YGR108W, YOL104C, YER016W, YJR053W, YJL090C, YMR273C, YMR001C, YOR014W, YBR274W, YPR120C, YGR238C, YDL188C, YNL088W, YDL155W, YNL201C, YOR178C, YBL046W, YKL108W, YHR115C, YMR168C, YOR351C, YLR288C, YNL102W, YDR130C, YCL024W, YMR153W, YBL051C, YGR098C, YDL194W, YFR027W, YJL030W, YKL048C, YBR…
GO:0010557	positive regulation of macromolecule biosynthetic process	9.39309381833159e-10	3.53522537385457e-13	192	3295	246	5841	0.00%	0	YPL126W, YPR009W, YDL042C, YHL020C, YBR020W, YPL248C, YGR116W, YAL051W, YIL131C, YBR289W, YER111C, YMR172W, YCL010C, YNL025C, YNL085W, YNL199C, YMR070W, YAL015C, YDL170W, YKL109W, YBL005W, YIR018W, YIL084C, YPR070W, YPL026C, YPL015C, YGR163W, YGL013C, YPL230W, YGL209W, YNL097C, YPR068C, YLR266C, YPL042C, YFL021W, YDR258C, YOR338W, YOR290C, YDR217C, YGL066W, YDR207C, YFL049W, YDR421W, YGR262C, YFL…
GO:0009891	positive regulation of biosynthetic process	1.42055088560657e-09	5.34644669027687e-13	205	3295	266	5841	0.00%	0	YPL126W, YPR009W, YDL042C, YHL020C, YBR020W, YPL248C, YGR116W, YAL051W, YIL131C, YBR289W, YER111C, YGL244W, YBR279W, YMR172W, YCL010C, YNL025C, YNL085W, YNL199C, YMR070W, YAL015C, YDL170W, YKL109W, YBL005W, YIR018W, YIL084C, YBL060W, YPR070W, YPL026C, YPL015C, YOL145C, YGR163W, YGL013C, YPL230W, YGL209W, YNL097C, YPR068C, YLR266C, YPL042C, YFL021W, YDR258C, YOR338W, YOR290C, YDR217C, YGL066W, YDR…
GO:0031328	positive regulation of cellular biosynthetic process	1.42055088560657e-09	5.34644669027687e-13	205	3295	266	5841	0.00%	0	YPL126W, YPR009W, YDL042C, YHL020C, YBR020W, YPL248C, YGR116W, YAL051W, YIL131C, YBR289W, YER111C, YGL244W, YBR279W, YMR172W, YCL010C, YNL025C, YNL085W, YNL199C, YMR070W, YAL015C, YDL170W, YKL109W, YBL005W, YIR018W, YIL084C, YBL060W, YPR070W, YPL026C, YPL015C, YOL145C, YGR163W, YGL013C, YPL230W, YGL209W, YNL097C, YPR068C, YLR266C, YPL042C, YFL021W, YDR258C, YOR338W, YOR290C, YDR217C, YGL066W, YDR…
GO:0051179	localization	1.59034385600604e-09	5.98548684985336e-13	851	3295	1310	5841	0.00%	0	YNL139C, YOR016C, YLR429W, YNL242W, YOR100C, YPL189W, YDR135C, YKL203C, YOR181W, YJR089W, YMR237W, YKL205W, YGR116W, YPR095C, YBL069W, YGR121C, YPL094C, YER016W, YDL234C, YIL023C, YER166W, YIL044C, YCR027C, YHR194W, YMR004W, YDL119C, YIL115C, YNL272C, YOL158C, YOL018C, YHR115C, YPL221W, YDR130C, YER185W, YLR301W, YDL194W, YLR384C, YGR099W, YLR093C, YBR170C, YOL103W, YLR229C, YGL219C, YOR109W, YPL…
GO:0051301	cell division	3.49146260226258e-09	1.31406195041874e-12	220	3295	290	5841	0.00%	0	YGL240W, YMR032W, YBR267W, YOR181W, YLR319C, YJR089W, YOL113W, YDR218C, YNL233W, YKL101W, YMR238W, YLL003W, YGR108W, YER016W, YJR053W, YLR190W, YOR299W, YHR023W, YDL188C, YDL155W, YLR381W, YDR364C, YOR326W, YNL020C, YHR115C, YCR077C, YJL085W, YIL095W, YPL233W, YPL242C, YMR153W, YOR353C, YDL220C, YHR124W, YDR182W, YBR023C, YGL116W, YIL106W, YPR119W, YJR076C, YLR229C, YIL050W, YGL233W, YDL134C, YMR…
GO:0010605	negative regulation of macromolecule metabolic process	5.11085285883068e-09	1.9235426642193e-12	211	3295	277	5841	0.00%	0	YML113W, YOR083W, YJL168C, YDL042C, YHL020C, YHR119W, YOL113W, YOL090W, YKL005C, YPL031C, YGR116W, YAL051W, YAR003W, YIR002C, YIL131C, YNL206C, YOR144C, YGL244W, YLL022C, YPL219W, YBR279W, YNL025C, YLR335W, YMR070W, YBL052C, YBR050C, YOR178C, YPL001W, YCR077C, YDR206W, YOL045W, YLR288C, YIR018W, YKR019C, YIL084C, YOL017W, YGR280C, YDR448W, YPR070W, YLR417W, YPL015C, YOL145C, YPL008W, YPR065W, YGL…
GO:0045944	positive regulation of transcription from RNA polymerase II promoter	5.21444702248197e-09	1.96253181124651e-12	140	3295	172	5841	0.00%	0	YPR009W, YHL020C, YPL248C, YGR116W, YAL051W, YIL131C, YMR172W, YCL010C, YNL025C, YNL199C, YMR070W, YKL109W, YBL005W, YIR018W, YIL084C, YPR070W, YPL026C, YGR163W, YGL013C, YPL230W, YGL209W, YNL097C, YPR068C, YLR266C, YPL042C, YOR338W, YOR290C, YDR217C, YDR207C, YGL066W, YFL049W, YDR421W, YGR262C, YFL031W, YMR263W, YOR140W, YHR006W, YNL236W, YER125W, YGL162W, YGR097W, YDR443C, YGL025C, YDR512C, YNL…
GO:0044238	primary metabolic process	7.38355651096168e-09	2.77890723032054e-12	1939	3295	3206	5841	0.00%	0	YKL168C, YPL095C, YKL203C, YHR119W, YMR237W, YDR140W, YKL205W, YBR057C, YMR238W, YLR085C, YHR033W, YKL222C, YFL030W, YGL244W, YEL015W, YGR275W, YNL062C, YGL236C, YJL081C, YLR362W, YCR092C, YMR012W, YGL257C, YGL175C, YHR115C, YAL015C, YFR032C, YGR177C, YOR047C, YER050C, YKL109W, YML075C, YKR019C, YPL207W, YOR250C, YGL179C, YPR031W, YJL162C, YLR384C, YIL075C, YDR430C, YOR109W, YDL040C, YKL126W, YMR…
GO:0000003	reproduction	8.23596083452136e-09	3.09972180448678e-12	325	3295	454	5841	0.00%	0	YLR035C, YOR181W, YLR319C, YHR119W, YOL090W, YDR218C, YBR057C, YMR238W, YLR320W, YAL009W, YLR213C, YJL090C, YCL048W, YNR044W, YML057W, YGR238C, YNL025C, YLR362W, YLR381W, YER180C, YCR092C, YOR178C, YHL023C, YOR326W, YGL249W, YGL175C, YFR048W, YOR351C, YBR040W, YDL194W, YMR198W, YBR023C, YLR229C, YGR059W, YDL134C, YCL027W, YMR076C, YPL042C, YFL026W, YLR166C, YDR113C, YKL116C, YKR099W, YOR338W, YLR…
GO:0006281	DNA repair	1.02453153866942e-08	3.85597116548522e-12	199	3295	260	5841	0.00%	0	YOR386W, YBR223C, YNL139C, YER162C, YPR019W, YLR035C, YNL307C, YDL042C, YOL090W, YDL200C, YDL105W, YIR002C, YLR320W, YBR289W, YOR144C, YBR073W, YGL244W, YJL090C, YLR383W, YDR489W, YBR279W, YJL081C, YMR078C, YIL143C, YNL085W, YLR032W, YCR092C, YGR056W, YKL213C, YGL175C, YPL001W, YDR317W, YAL015C, YER041W, YLR288C, YOL095C, YDR419W, YPL204W, YDL102W, YDR182W, YOL145C, YKL045W, YPL022W, YPR175W, YER…
GO:0006793	phosphorus metabolic process	1.1720268983266e-08	4.41109107386752e-12	283	3295	389	5841	0.00%	0	YKL168C, YER059W, YKL203C, YKL166C, YHR033W, YGL244W, YJL090C, YPL219W, YBR279W, YMR104C, YNL025C, YEL041W, YDL155W, YPL203W, YLR362W, YJL103C, YPR111W, YDR196C, YKL212W, YNL020C, YOR351C, YOL045W, YLR096W, YLR260W, YGL179C, YIL106W, YNL099C, YLR345W, YPL140C, YOR109W, YLR361C, YDL134C, YKL126W, YPL042C, YKL116C, YJR049C, YGL190C, YLL019C, YLR248W, YGR262C, YLR005W, YHR102W, YCR036W, YDL006W, YLR…
GO:0006796	phosphate-containing compound metabolic process	1.1720268983266e-08	4.41109107386752e-12	283	3295	389	5841	0.00%	0	YKL168C, YER059W, YKL203C, YKL166C, YHR033W, YGL244W, YJL090C, YPL219W, YBR279W, YMR104C, YNL025C, YEL041W, YDL155W, YPL203W, YLR362W, YJL103C, YPR111W, YDR196C, YKL212W, YNL020C, YOR351C, YOL045W, YLR096W, YLR260W, YGL179C, YIL106W, YNL099C, YLR345W, YPL140C, YOR109W, YLR361C, YDL134C, YKL126W, YPL042C, YKL116C, YJR049C, YGL190C, YLL019C, YLR248W, YGR262C, YLR005W, YHR102W, YCR036W, YDL006W, YLR…
GO:0008152	metabolic process	1.66213442597338e-08	6.2556809408106e-12	2133	3295	3558	5841	0.00%	0	YDR140W, YMR238W, YPR121W, YEL015W, YNL062C, YGL236C, YJL081C, YCR092C, YGL257C, YHR115C, YGR177C, YKL109W, YML075C, YOR250C, YLR384C, YIL075C, YDL040C, YGR093W, YKL126W, YMR223W, YPR001W, YDL164C, YLR059C, YLL051C, YJR045C, YLR248W, YKR086W, YDL112W, YCR036W, YJL005W, YPR049C, YCL031C, YJL076W, YNL236W, YER032W, YGR133W, YDR414C, YCR068W, YPL236C, YPL119C, YPL270W, YJL098W, YPR179C, YPL164C, YPL…
GO:0033554	cellular response to stress	2.50880150158873e-08	9.44223372822255e-12	377	3295	539	5841	0.00%	0	YBR223C, YMR032W, YNL139C, YNL242W, YER162C, YLR035C, YDL042C, YHR119W, YOL090W, YDL105W, YGR116W, YLR320W, YBR289W, YGL244W, YJL090C, YDR489W, YBL022C, YBR279W, YMR172W, YER174C, YJL081C, YOR106W, YLR362W, YNL085W, YLR032W, YCR092C, YGR023W, YHL023C, YGL175C, YDR317W, YAL015C, YDR501W, YKR019C, YLR183C, YBL051C, YIL084C, YPR065W, YPL196W, YNL099C, YBR170C, YLR361C, YMR076C, YLR266C, YDL164C, YDR…
GO:0035556	intracellular signal transduction	3.84844439401585e-08	1.4484171599608e-11	150	3295	189	5841	0.00%	0	YJL095W, YKL203C, YDR466W, YIL113W, YLR319C, YLR305C, YPL031C, YPR095C, YKL051W, YKL166C, YOR360C, YNL180C, YDL240W, YDL234C, YIL044C, YCR027C, YOR057W, YPL203W, YLR362W, YNL201C, YHL023C, YLR452C, YPL161C, YNL305C, YKR055W, YLR260W, YPL242C, YKR019C, YOR070C, YBL060W, YER093C, YHL029C, YLR229C, YJL005W, YDL006W, YOR134W, YDR309C, YJL164C, YPL249C, YBL085W, YGR070W, YMR232W, YGL197W, YFL047W, YJR…
GO:0016568	chromatin modification	6.22117671611074e-08	2.34142894847977e-11	155	3295	197	5841	0.00%	0	YML127W, YKL033W, YLR033W, YJL168C, YDL042C, YLR319C, YHR119W, YFR013W, YGR116W, YKR029C, YLR085C, YAR003W, YIL131C, YBR289W, YNL206C, YGL244W, YLL022C, YGR275W, YBR279W, YBL008W, YCL010C, YJL081C, YBL052C, YDR145W, YGR056W, YPL001W, YNL059C, YMR236W, YIL084C, YDR448W, YPR031W, YOL145C, YBL032W, YAL011W, YNL097C, YPR068C, YDR303C, YMR223W, YDR499W, YER164W, YGR002C, YGL112C, YOR290C, YDR207C, YGL…
GO:0000087	M phase of mitotic cell cycle	6.61707474034245e-08	2.49043083942132e-11	159	3295	203	5841	0.00%	0	YGL240W, YMR032W, YNL307C, YJR089W, YMR308C, YLL003W, YGR108W, YOR144C, YER016W, YJR053W, YGR238C, YMR078C, YDL188C, YDL155W, YLR381W, YOR178C, YHR115C, YMR168C, YDR130C, YPL233W, YPL204W, YMR153W, YMR198W, YPL008W, YGL116W, YIL106W, YPR119W, YLR229C, YDL134C, YMR076C, YPL253C, YOR269W, YDR113C, YGR002C, YGL190C, YGL003C, YIL046W, YIL122W, YMR048W, YAL047C, YOR262W, YJR112W, YJL076W, YLR226W, YDR…
GO:0023051	regulation of signaling	1.08320136375217e-07	4.07678345409173e-11	89	3295	103	5841	0.00%	0	YGL073W, YIL113W, YNL293W, YPL031C, YPR095C, YLR425W, YPL256C, YNL127W, YBR140C, YGL181W, YDL234C, YPL115C, YML057W, YIL044C, YKL197C, YBL056W, YMR218C, YER124C, YHL023C, YDR373W, YLR452C, YPL242C, YOR070C, YBL060W, YLR433C, YER122C, YBR276C, YDR183W, YHL029C, YGL194C, YDL216C, YAL041W, YOL081W, YOL044W, YJR084W, YOL112W, YEL062W, YER155C, YGR100W, YMR025W, YNL329C, YOL078W, YEL022W, YLR371W, YIL…
GO:0007067	mitosis	1.12196132900418e-07	4.22266213400142e-11	147	3295	186	5841	0.00%	0	YGL240W, YMR032W, YNL307C, YJR089W, YMR308C, YLL003W, YGR108W, YOR144C, YER016W, YJR053W, YMR078C, YDL188C, YDL155W, YLR381W, YOR178C, YHR115C, YMR168C, YDR130C, YPL233W, YPL204W, YMR153W, YMR198W, YPL008W, YGL116W, YPR119W, YDL134C, YMR076C, YPL253C, YOR269W, YDR113C, YGR002C, YGL003C, YIL122W, YMR048W, YAL047C, YOR262W, YJR112W, YJL076W, YLR226W, YOR058C, YDL088C, YJL019W, YNL327W, YEL061C, YCR…
GO:0010033	response to organic substance	1.23351241954181e-07	4.64250063809487e-11	136	3295	170	5841	0.00%	0	YDL035C, YJL095W, YGR184C, YIL113W, YHL020C, YOR153W, YAL051W, YIL131C, YNL127W, YGR048W, YNR044W, YML057W, YLR362W, YHR204W, YLR452C, YDL170W, YPL161C, YNL305C, YBR040W, YPL026C, YDL194W, YBR170C, YLR229C, YDR372C, YLR361C, YJR084W, YCL027W, YNR047W, YFL026W, YFL021W, YJL157C, YPL049C, YKL116C, YCL058C, YJL156C, YFR029W, YDR207C, YFL031W, YDR143C, YIL122W, YDL214C, YDL006W, YKL190W, YMR214W, YGR…
GO:0000280	nuclear division	1.65960347680075e-07	6.24615535115074e-11	148	3295	188	5841	0.00%	0	YGL240W, YMR032W, YNL307C, YJR089W, YMR308C, YLL003W, YGR108W, YOR144C, YER016W, YJR053W, YMR078C, YDL188C, YDL155W, YLR381W, YOR178C, YHR115C, YMR168C, YDR130C, YPL233W, YPL204W, YMR153W, YMR198W, YPL008W, YGL116W, YPR119W, YDL134C, YMR076C, YPL253C, YOR269W, YDR113C, YGR002C, YGL003C, YIL122W, YMR048W, YAL047C, YOR262W, YJR112W, YJL076W, YLR226W, YOR058C, YDL088C, YJL019W, YNL327W, YEL061C, YCR…
GO:0051329	interphase of mitotic cell cycle	1.85525550546541e-07	6.98251977969667e-11	98	3295	116	5841	0.00%	0	YML127W, YIL150C, YIL153W, YCL055W, YLR033W, YLR210W, YNL068C, YGL060W, YOR083W, YPR019W, YKL203C, YIL126W, YPL031C, YGR116W, YKL101W, YLL003W, YFL029C, YIL131C, YDR247W, YGR108W, YER167W, YJL090C, YBR279W, YPR120C, YJL194W, YFR040W, YLR182W, YDL188C, YNL088W, YDL155W, YOL004W, YDR364C, YDL056W, YKL108W, YOR372C, YNL102W, YKR077W, YDL139C, YBL051C, YDL102W, YOL145C, YJR140C, YJL030W, YBR215W, YBR…
GO:0008104	protein localization	1.95109296226052e-07	7.34321777290374e-11	403	3295	586	5841	0.00%	0	YOR016C, YNL242W, YJL204C, YJR089W, YMR237W, YMR308C, YLR148W, YBL069W, YPL094C, YJR005W, YER166W, YDL058W, YOR299W, YOR106W, YMR004W, YIL115C, YNL272C, YOL018C, YOR326W, YGR046W, YJL212C, YDR130C, YMR153W, YLR301W, YLR384C, YGR099W, YBR170C, YGL092W, YOR109W, YER143W, YLR268W, YHR170W, YOR098C, YCL027W, YPL065W, YPL243W, YLR039C, YNL197C, YLR166C, YDR113C, YIR022W, YIL048W, YJR045C, YJR074W, YDR…
GO:0009966	regulation of signal transduction	1.9521877651561e-07	7.34733822038425e-11	85	3295	98	5841	0.00%	0	YGL073W, YIL113W, YNL293W, YPL031C, YPR095C, YLR425W, YPL256C, YBR140C, YNL127W, YGL181W, YDL234C, YPL115C, YML057W, YIL044C, YBL056W, YMR218C, YER124C, YHL023C, YDR373W, YLR452C, YPL242C, YOR070C, YBL060W, YLR433C, YER122C, YBR276C, YDR183W, YHL029C, YGL194C, YDL216C, YAL041W, YOL081W, YJR084W, YOL112W, YEL062W, YER155C, YGR100W, YMR025W, YOL078W, YEL022W, YLR371W, YIL122W, YMR052W, YMR055C, YDL…
GO:0051325	interphase	3.40285711673201e-07	1.28071400705006e-10	99	3295	118	5841	0.00%	0	YML127W, YIL150C, YIL153W, YCL055W, YLR033W, YLR210W, YNL068C, YGL060W, YOR083W, YPR019W, YKL203C, YIL126W, YPL031C, YGR116W, YKL101W, YLL003W, YFL029C, YIL131C, YDR247W, YGR108W, YER167W, YJL090C, YBR279W, YPR120C, YJL194W, YFR040W, YLR182W, YDL188C, YNL088W, YDL155W, YOL004W, YDR364C, YDL056W, YKL108W, YOR372C, YNL102W, YKR077W, YDL139C, YBL051C, YDL102W, YOL145C, YJR140C, YJL030W, YBR215W, YBR…
GO:0044237	cellular metabolic process	3.85355863449934e-07	1.45034197760607e-10	2023	3295	3376	5841	0.00%	0	YKL168C, YPL095C, YKL203C, YHR119W, YMR237W, YDR140W, YKL205W, YBR057C, YLR085C, YHR033W, YKL222C, YFL030W, YPR121W, YGL244W, YEL015W, YGR275W, YNL062C, YGL236C, YJL081C, YLR362W, YCR092C, YNL272C, YMR012W, YGL257C, YGL175C, YHR115C, YAL015C, YFR032C, YGR177C, YOR047C, YER050C, YKL109W, YML075C, YKR019C, YPL207W, YOR250C, YGL179C, YPR031W, YJL162C, YLR384C, YIL075C, YDR430C, YOR109W, YDL040C, YKL…
GO:0048285	organelle fission	5.14289691747777e-07	1.93560290458328e-10	153	3295	197	5841	0.00%	0	YGL240W, YMR032W, YNL307C, YJR089W, YMR308C, YLL003W, YIL065C, YGR108W, YOR144C, YER016W, YJR053W, YMR078C, YDL188C, YDL155W, YLR381W, YOR178C, YHR115C, YMR168C, YDR130C, YPL233W, YPL204W, YMR153W, YMR198W, YPL008W, YGL116W, YPR119W, YPR083W, YDL134C, YMR076C, YPL253C, YOR269W, YDR113C, YGR002C, YGL003C, YIL122W, YMR048W, YAL047C, YOR262W, YJR112W, YJL076W, YLR226W, YOR058C, YDL088C, YJL019W, YNL…
GO:0000122	negative regulation of transcription from RNA polymerase II promoter	8.03928218294505e-07	3.02569897739746e-10	92	3295	109	5841	0.00%	0	YGL220W, YCL055W, YML113W, YNL068C, YOR083W, YDR295C, YKL032C, YLR113W, YHL020C, YKL005C, YPL031C, YBL093C, YGR116W, YIL131C, YNL206C, YCR084C, YDR173C, YGL244W, YPL075W, YDR223W, YBR279W, YNL025C, YLR451W, YMR182C, YOL004W, YMR070W, YNL021W, YGL035C, YDR096W, YBR050C, YDL020C, YOR178C, YDL056W, YNL167C, YHL027W, YIR018W, YPR070W, YLR417W, YPR065W, YGR270W, YCR081W, YGL209W, YER161C, YLL029W, YDL…
GO:0022414	reproductive process	1.5693633580299e-06	5.90652374117386e-10	270	3295	379	5841	0.00%	0	YLR035C, YHR119W, YOL090W, YDR218C, YBR057C, YLR320W, YAL009W, YLR213C, YJL090C, YCL048W, YNR044W, YML057W, YNL025C, YLR362W, YLR381W, YER180C, YCR092C, YOR178C, YHL023C, YGL249W, YGL175C, YFR048W, YOR351C, YBR040W, YDL194W, YMR198W, YBR023C, YLR229C, YGR059W, YCL027W, YMR076C, YPL042C, YFL026W, YDR113C, YKR099W, YOR338W, YLR248W, YFL031W, YCR045C, YIL122W, YDL006W, YMR048W, YKL190W, YDL154W, YEL…
GO:0048610	cellular process involved in reproduction	1.5693633580299e-06	5.90652374117386e-10	270	3295	379	5841	0.00%	0	YLR035C, YHR119W, YOL090W, YDR218C, YBR057C, YLR320W, YAL009W, YLR213C, YJL090C, YCL048W, YNR044W, YML057W, YNL025C, YLR362W, YLR381W, YER180C, YCR092C, YOR178C, YHL023C, YGL249W, YGL175C, YFR048W, YOR351C, YBR040W, YDL194W, YMR198W, YBR023C, YLR229C, YGR059W, YCL027W, YMR076C, YPL042C, YFL026W, YDR113C, YKR099W, YOR338W, YLR248W, YFL031W, YCR045C, YIL122W, YDL006W, YMR048W, YKL190W, YDL154W, YEL…
GO:0016049	cell growth	4.62769221794163e-06	1.74169823784028e-09	67	3295	76	5841	0.00%	0	YKL149C, YIL049W, YDL035C, YNL068C, YKL203C, YOR315W, YMR238W, YOL116W, YIL131C, YHR011W, YPL180W, YNL098C, YLR362W, YNL006W, YOR326W, YER093C, YKL048C, YNL047C, YER020W, YLR229C, YJR094C, YJR147W, YHR073W, YHR084W, YKL110C, YCR093W, YDL230W, YPL049C, YNL197C, YLR313C, YMR068W, YER113C, YOL078W, YDR207C, YMR016C, YER149C, YOR127W, YOR140W, YNL119W, YDL024C, YJR066W, YDR107C, YDL159W, YDR379W, YHL…
GO:0051321	meiotic cell cycle	5.19468942405412e-06	1.95509575613629e-09	152	3295	199	5841	0.00%	0	YJL168C, YLR035C, YNL307C, YOL090W, YBR186W, YGL251C, YBR057C, YKR029C, YLR320W, YAL009W, YFL033C, YGR108W, YBR073W, YGL192W, YOR014W, YGL213C, YNL025C, YLR381W, YER180C, YCR092C, YNL201C, YOR178C, YHL023C, YGL249W, YGL175C, YFR048W, YOR351C, YPL204W, YDL194W, YHR124W, YJR021C, YMR198W, YPL022W, YGL116W, YIL073C, YMR076C, YPL042C, YPL121C, YDR113C, YKR099W, YPL157W, YJL146W, YLR248W, YDR207C, YFL…
GO:0007126	meiosis	5.22447681890552e-06	1.96630666876384e-09	150	3295	196	5841	0.00%	0	YJL168C, YLR035C, YNL307C, YOL090W, YBR186W, YGL251C, YBR057C, YKR029C, YLR320W, YAL009W, YFL033C, YGR108W, YBR073W, YGL192W, YOR014W, YGL213C, YNL025C, YLR381W, YER180C, YCR092C, YNL201C, YOR178C, YHL023C, YGL249W, YGL175C, YFR048W, YOR351C, YPL204W, YDL194W, YHR124W, YJR021C, YMR198W, YPL022W, YGL116W, YIL073C, YMR076C, YPL042C, YPL121C, YDR113C, YKR099W, YPL157W, YJL146W, YLR248W, YDR207C, YFL…
GO:0051327	M phase of meiotic cell cycle	5.22447681890552e-06	1.96630666876384e-09	150	3295	196	5841	0.00%	0	YJL168C, YLR035C, YNL307C, YOL090W, YBR186W, YGL251C, YBR057C, YKR029C, YLR320W, YAL009W, YFL033C, YGR108W, YBR073W, YGL192W, YOR014W, YGL213C, YNL025C, YLR381W, YER180C, YCR092C, YNL201C, YOR178C, YHL023C, YGL249W, YGL175C, YFR048W, YOR351C, YPL204W, YDL194W, YHR124W, YJR021C, YMR198W, YPL022W, YGL116W, YIL073C, YMR076C, YPL042C, YPL121C, YDR113C, YKR099W, YPL157W, YJL146W, YLR248W, YDR207C, YFL…
GO:0006325	chromatin organization	7.32131145715334e-06	2.75548041292937e-09	176	3295	236	5841	0.00%	0	YML127W, YGL240W, YKL033W, YLR033W, YJL168C, YDL042C, YLR319C, YHR119W, YFR013W, YGR116W, YKR029C, YLR085C, YAR003W, YIL131C, YBR289W, YNL206C, YGL244W, YLL022C, YGR275W, YBR279W, YBL008W, YCL010C, YML102W, YJL081C, YBL052C, YDR145W, YGR056W, YPL001W, YNL059C, YMR236W, YPR133C, YIL084C, YDR448W, YPR031W, YOL145C, YBL032W, YAL011W, YNL097C, YPR068C, YDR303C, YMR223W, YDR499W, YLR141W, YER164W, YGR…
GO:0006260	DNA replication	7.50939793821553e-06	2.82626945360013e-09	116	3295	146	5841	0.00%	0	YIL150C, YOR217W, YPR019W, YJL168C, YDL042C, YJR006W, YGL251C, YBR057C, YIR002C, YLR320W, YOR005C, YOR144C, YJL090C, YDR489W, YBR274W, YPR120C, YJL194W, YMR078C, YNL088W, YLR381W, YOL004W, YPR023C, YNL218W, YKL108W, YDR279W, YAL015C, YNL102W, YDR419W, YBR278W, YGL207W, YGR280C, YKL022C, YDL102W, YDL220C, YFR027W, YKL045W, YPL008W, YBL032W, YPL181W, YPR175W, YGR099W, YIL066C, YLR233C, YPL167C, YDR…
GO:0051641	cellular localization	7.60381883716054e-06	2.86180611108789e-09	507	3295	767	5841	0.00%	0	YNL139C, YOR016C, YLR429W, YNL242W, YOR181W, YJL204C, YJR089W, YMR237W, YMR308C, YLR148W, YKL205W, YGR116W, YPR095C, YBL069W, YML104C, YPL269W, YPL094C, YER016W, YJR005W, YER166W, YIL044C, YCR027C, YLR190W, YDL058W, YOR299W, YOR106W, YHR194W, YMR004W, YIL115C, YNL272C, YOL018C, YOR326W, YHR115C, YGR046W, YPR058W, YLR096W, YDR130C, YMR153W, YLR301W, YMR198W, YHR167W, YGR099W, YGL092W, YLR229C, YER…
GO:0006310	DNA recombination	8.56772088920522e-06	3.22458445209079e-09	122	3295	155	5841	0.00%	0	YIL150C, YNL139C, YPR019W, YJL168C, YLR035C, YML128C, YDL042C, YOL090W, YGL251C, YDL105W, YER173W, YIR002C, YLR320W, YOR005C, YOR144C, YOL104C, YML023C, YBR073W, YJL090C, YGR296W, YLR383W, YDR489W, YMR001C, YGL213C, YBR279W, YMR167W, YMR078C, YIL143C, YNL088W, YDL059C, YCR092C, YJL051W, YKL108W, YGL249W, YGL175C, YLR288C, YNL102W, YIL132C, YLR219W, YFR038W, YFR031C, YPL015C, YJR021C, YPL008W, YHR…
GO:0007346	regulation of mitotic cell cycle	1.19724847088283e-05	4.50601607407915e-09	83	3295	99	5841	0.00%	0	YGL240W, YLR210W, YAR019C, YKR072C, YMR308C, YKL101W, YGR108W, YER016W, YJR053W, YJL090C, YMR273C, YOR014W, YPR120C, YGR238C, YDL188C, YNL088W, YDL155W, YOR178C, YKL108W, YHR115C, YMR168C, YNL102W, YDR130C, YMR153W, YGR098C, YDL102W, YFR027W, YJL030W, YBR276C, YGL116W, YIL106W, YPR119W, YLR229C, YAL041W, YLR361C, YGR188C, YDL074C, YDL028C, YDL134C, YLR215C, YNL298W, YMR135C, YHR166C, YGL190C, YDR…
GO:0051234	establishment of localization	1.20576952419794e-05	4.53808627850184e-09	772	3295	1212	5841	0.00%	0	YNL139C, YOR016C, YNL242W, YOR100C, YPL189W, YDR135C, YKL203C, YOR181W, YJR089W, YMR237W, YKL205W, YGR116W, YPR095C, YBL069W, YGR121C, YPL094C, YER016W, YDL234C, YIL023C, YER166W, YIL044C, YCR027C, YMR004W, YDL119C, YIL115C, YNL272C, YOL158C, YOL018C, YHR115C, YPL221W, YER185W, YLR301W, YDL194W, YLR384C, YLR093C, YBR170C, YOL103W, YLR229C, YGL219C, YOR109W, YPL058C, YPL244C, YKL126W, YOR098C, YPL…
GO:0007050	cell cycle arrest	1.38581734268652e-05	5.21572202742386e-09	70	3295	81	5841	0.00%	0	YJR089W, YKL101W, YER173W, YER016W, YJR053W, YJL090C, YMR273C, YOR014W, YBR274W, YDL188C, YNL088W, YNL201C, YOR178C, YBL046W, YKL108W, YHR115C, YMR168C, YOR351C, YLR288C, YNL102W, YDR130C, YCL024W, YBL051C, YJL030W, YKL048C, YGL116W, YDR440W, YGR188C, YDL074C, YDL028C, YDL134C, YDR075W, YDR499W, YJL157C, YBR136W, YLR263W, YJR090C, YPL153C, YGL190C, YDR217C, YDR283C, YNL273W, YJL013C, YMR055C, YMR…
GO:0006261	DNA-dependent DNA replication	1.41784118473713e-05	5.33624834300765e-09	85	3295	102	5841	0.00%	0	YIL150C, YOR217W, YPR019W, YJL168C, YJR006W, YGL251C, YIR002C, YLR320W, YOR144C, YJL090C, YDR489W, YBR274W, YJL194W, YMR078C, YNL088W, YOL004W, YLR381W, YPR023C, YNL218W, YKL108W, YDR279W, YAL015C, YNL102W, YBR278W, YGL207W, YKL022C, YDL102W, YKL045W, YPL008W, YPL181W, YPR175W, YLR135W, YDR303C, YLR103C, YNL262W, YOL006C, YNL261W, YPL153C, YER164W, YDL164C, YPR164W, YHR031C, YDR310C, YPR135W, YBL…
GO:0007265	Ras protein signal transduction	1.98855227599159e-05	7.48420126455246e-09	61	3295	69	5841	0.00%	0	YLR313C, YER155C, YGR100W, YKL203C, YNL293W, YLR319C, YOL078W, YEL022W, YER149C, YLR371W, YPR095C, YKL166C, YJL005W, YLR425W, YMR055C, YNL180C, YCL014W, YDR170C, YER114C, YBR140C, YDR309C, YJL164C, YHR061C, YGL181W, YDL234C, YIL119C, YPL115C, YIL044C, YPL249C, YNL098C, YPL203W, YBL085W, YGR070W, YMR218C, YMR232W, YMR192W, YJR031C, YPL161C, YOR370C, YNL283C, YPL242C, YJL044C, YLR310C, YOR070C, YKL…
GO:0033036	macromolecule localization	2.12907010391941e-05	8.01306023304258e-09	463	3295	698	5841	0.00%	0	YNL139C, YOR016C, YNL242W, YJL204C, YJR089W, YMR237W, YMR308C, YLR148W, YKL205W, YGR116W, YBL069W, YPL094C, YJR005W, YOR011W, YER166W, YDL058W, YOR299W, YOR106W, YMR004W, YIL115C, YNL272C, YOL018C, YOR326W, YGR046W, YJL212C, YDR130C, YMR153W, YLR301W, YHR167W, YLR384C, YGR099W, YBR170C, YGL092W, YGL219C, YOR109W, YER143W, YLR268W, YKL126W, YHR170W, YOR098C, YCL027W, YPL065W, YPL243W, YLR039C, YNL…
GO:0000075	cell cycle checkpoint	2.4985000345937e-05	9.40346268194845e-09	66	3295	76	5841	0.00%	0	YJR089W, YKL101W, YER173W, YER016W, YJR053W, YJL090C, YMR273C, YOR014W, YBR274W, YDL188C, YNL088W, YNL201C, YOR178C, YBL046W, YKL108W, YHR115C, YMR168C, YOR351C, YLR288C, YNL102W, YDR130C, YCL024W, YBL051C, YJL030W, YKL048C, YGL116W, YDR440W, YGR188C, YDL074C, YDL028C, YDL134C, YDR075W, YDR499W, YBR136W, YLR263W, YPL153C, YGL190C, YDR217C, YDR283C, YNL273W, YJL013C, YMR055C, YMR048W, YAL047C, YOR…
GO:0071156	regulation of cell cycle arrest	2.4985000345937e-05	9.40346268194845e-09	66	3295	76	5841	0.00%	0	YJR089W, YKL101W, YER173W, YER016W, YJR053W, YJL090C, YMR273C, YOR014W, YBR274W, YDL188C, YNL088W, YNL201C, YOR178C, YBL046W, YKL108W, YHR115C, YMR168C, YOR351C, YLR288C, YNL102W, YDR130C, YCL024W, YBL051C, YJL030W, YKL048C, YGL116W, YDR440W, YGR188C, YDL074C, YDL028C, YDL134C, YDR075W, YDR499W, YBR136W, YLR263W, YPL153C, YGL190C, YDR217C, YDR283C, YNL273W, YJL013C, YMR055C, YMR048W, YAL047C, YOR…
GO:0016458	gene silencing	3.61879906233141e-05	1.36198685070809e-08	103	3295	129	5841	0.00%	0	YIL150C, YNL068C, YDR295C, YIR033W, YDL042C, YHR119W, YOL090W, YAL051W, YAR003W, YIL131C, YDR191W, YNL206C, YOR025W, YGL244W, YLL022C, YMR273C, YBR279W, YJL194W, YLR272C, YOL004W, YLR335W, YBL052C, YNL021W, YNL186W, YLR015W, YPL001W, YLR288C, YKR101W, YIR018W, YKR019C, YBR278W, YIL084C, YOL017W, YDR448W, YPL015C, YLR223C, YOL145C, YGR270W, YPL181W, YDR440W, YNL097C, YDR110W, YDL074C, YLR103C, YNL…
GO:0065009	regulation of molecular function	3.64191075407396e-05	1.37068526687014e-08	126	3295	163	5841	0.00%	0	YGL240W, YLR210W, YER059W, YPR025C, YNL068C, YNL224C, YIL113W, YNL293W, YPL031C, YLR073C, YIL131C, YGR108W, YDR389W, YPL256C, YGR186W, YDL240W, YBR140C, YPL219W, YGL181W, YDL234C, YGR040W, YPL115C, YPR120C, YIL044C, YNL025C, YNL098C, YGR239C, YDL155W, YLR362W, YMR258C, YBL056W, YMR218C, YNR026C, YPL161C, YPL137C, YER021W, YLR260W, YPL242C, YCR079W, YDR214W, YDR320C, YOR070C, YGR098C, YDL220C, YER…
GO:0045786	negative regulation of cell cycle	4.25942607218858e-05	1.60309600007098e-08	70	3295	82	5841	0.00%	0	YJR089W, YKL101W, YER173W, YER016W, YJR053W, YJL090C, YMR273C, YOR014W, YBR274W, YDL188C, YNL088W, YNL201C, YOR178C, YBL046W, YKL108W, YHR115C, YMR168C, YOR351C, YLR288C, YNL102W, YDR130C, YCL024W, YBL051C, YJL030W, YKL048C, YGL116W, YDR440W, YGR188C, YDL074C, YDL028C, YDL134C, YDR075W, YDR499W, YJL157C, YBR136W, YLR263W, YJR090C, YPL153C, YGL190C, YDR217C, YDR283C, YNL273W, YJL013C, YMR055C, YMR…
GO:0006342	chromatin silencing	4.8836663377716e-05	1.83803776355725e-08	100	3295	125	5841	0.00%	0	YIL150C, YNL068C, YIR033W, YDL042C, YHR119W, YOL090W, YAL051W, YAR003W, YIL131C, YDR191W, YNL206C, YOR025W, YGL244W, YLL022C, YMR273C, YBR279W, YJL194W, YLR272C, YOL004W, YLR335W, YBL052C, YNL021W, YNL186W, YLR015W, YPL001W, YLR288C, YKR101W, YIR018W, YKR019C, YBR278W, YIL084C, YOL017W, YDR448W, YPL015C, YLR223C, YOL145C, YGR270W, YPL181W, YDR440W, YNL097C, YDR110W, YDL074C, YLR103C, YNL262W, YDR…
GO:0040029	regulation of gene expression, epigenetic	4.8836663377716e-05	1.83803776355725e-08	100	3295	125	5841	0.00%	0	YIL150C, YNL068C, YIR033W, YDL042C, YHR119W, YOL090W, YAL051W, YAR003W, YIL131C, YDR191W, YNL206C, YOR025W, YGL244W, YLL022C, YMR273C, YBR279W, YJL194W, YLR272C, YOL004W, YLR335W, YBL052C, YNL021W, YNL186W, YLR015W, YPL001W, YLR288C, YKR101W, YIR018W, YKR019C, YBR278W, YIL084C, YOL017W, YDR448W, YPL015C, YLR223C, YOL145C, YGR270W, YPL181W, YDR440W, YNL097C, YDR110W, YDL074C, YLR103C, YNL262W, YDR…
GO:0045814	negative regulation of gene expression, epigenetic	4.8836663377716e-05	1.83803776355725e-08	100	3295	125	5841	0.00%	0	YIL150C, YNL068C, YIR033W, YDL042C, YHR119W, YOL090W, YAL051W, YAR003W, YIL131C, YDR191W, YNL206C, YOR025W, YGL244W, YLL022C, YMR273C, YBR279W, YJL194W, YLR272C, YOL004W, YLR335W, YBL052C, YNL021W, YNL186W, YLR015W, YPL001W, YLR288C, YKR101W, YIR018W, YKR019C, YBR278W, YIL084C, YOL017W, YDR448W, YPL015C, YLR223C, YOL145C, YGR270W, YPL181W, YDR440W, YNL097C, YDR110W, YDL074C, YLR103C, YNL262W, YDR…
GO:0009059	macromolecule biosynthetic process	6.0421595256612e-05	2.27405326520933e-08	839	3295	1333	5841	0.00%	0	YNL139C, YOR083W, YDL042C, YHR119W, YOL090W, YBR297W, YMR237W, YDR140W, YBR057C, YGR116W, YLR085C, YBR289W, YKL222C, YGL244W, YJL090C, YLR277C, YGR275W, YNL062C, YBL008W, YJL081C, YPL104W, YNL085W, YMR270C, YMR012W, YDR331W, YGL257C, YAL015C, YFR032C, YOR047C, YDR206W, YER050C, YKL109W, YKR019C, YIL084C, YNL038W, YDL220C, YPR031W, YLR384C, YGR099W, YGL209W, YEL055C, YMR223W, YOR076C, YDR459C, YPL…
GO:0051128	regulation of cellular component organization	6.8590141761446e-05	2.58148821081844e-08	159	3295	214	5841	0.00%	0	YGL240W, YKR021W, YLR429W, YJL168C, YKL203C, YOR181W, YLR319C, YHR119W, YMR308C, YLR148W, YGR116W, YIL131C, YGR108W, YGL244W, YER016W, YDL234C, YBR279W, YMR104C, YPR054W, YDL188C, YDR422C, YDL155W, YLR181C, YOR178C, YNL020C, YHR115C, YAL015C, YMR168C, YER176W, YKR055W, YIL095W, YDR130C, YMR153W, YGR280C, YDR448W, YDL220C, YOL145C, YMR306W, YER093C, YML068W, YGL116W, YPR119W, YLR229C, YDL134C, YKL…
GO:0006810	transport	7.20019838755783e-05	2.70989777476772e-08	749	3295	1181	5841	0.00%	0	YNL139C, YOR016C, YNL242W, YOR100C, YPL189W, YDR135C, YKL203C, YOR181W, YMR237W, YKL205W, YGR116W, YPR095C, YBL069W, YGR121C, YPL094C, YER016W, YDL234C, YIL023C, YER166W, YIL044C, YCR027C, YMR004W, YDL119C, YIL115C, YNL272C, YOL158C, YOL018C, YPL221W, YER185W, YLR301W, YDL194W, YLR384C, YLR093C, YBR170C, YOL103W, YLR229C, YGL219C, YOR109W, YPL058C, YPL244C, YKL126W, YOR098C, YPL065W, YBL007C, YLL…
GO:0034645	cellular macromolecule biosynthetic process	7.79962617453385e-05	2.93550100659912e-08	833	3295	1324	5841	0.00%	0	YNL139C, YOR083W, YDL042C, YHR119W, YOL090W, YBR297W, YMR237W, YDR140W, YBR057C, YGR116W, YLR085C, YBR289W, YKL222C, YGL244W, YJL090C, YLR277C, YGR275W, YNL062C, YBL008W, YJL081C, YPL104W, YNL085W, YMR270C, YMR012W, YDR331W, YGL257C, YAL015C, YFR032C, YOR047C, YDR206W, YER050C, YKL109W, YKR019C, YIL084C, YNL038W, YDL220C, YPR031W, YLR384C, YGR099W, YGL209W, YEL055C, YMR223W, YOR076C, YDR459C, YPL…
GO:0032879	regulation of localization	9.34624737673046e-05	3.51759404468591e-08	63	3295	73	5841	0.00%	0	YNL197C, YKR021W, YPR009W, YGR184C, YKL203C, YDR189W, YHR030C, YHR205W, YLR228C, YLR148W, YDR164C, YPL031C, YLR342W, YLR371W, YCR084C, YGR217W, YIL114C, YMR273C, YKL038W, YER125W, YER151C, YER107C, YGL162W, YPL177C, YNL098C, YOR208W, YGR097W, YJL093C, YMR192W, YNL020C, YPR115W, YML099C, YNR026C, YBR112C, YDR080W, YJR040W, YIL095W, YNL229C, YDR126W, YNL027W, YGL095C, YLR368W, YMR231W, YOR008C, YOL…
GO:0050790	regulation of catalytic activity	9.41010790881767e-05	3.54162887046205e-08	115	3295	148	5841	0.00%	0	YGL240W, YLR210W, YER059W, YPR025C, YNL224C, YIL113W, YNL293W, YLR073C, YGR108W, YDR389W, YPL256C, YGR186W, YDL240W, YBR140C, YPL219W, YGL181W, YDL234C, YPL115C, YPR120C, YIL044C, YNL025C, YNL098C, YDL155W, YLR362W, YMR258C, YBL056W, YMR218C, YNR026C, YPL161C, YPL137C, YER021W, YLR260W, YPL242C, YCR079W, YDR214W, YDR320C, YOR070C, YGR098C, YDL220C, YER122C, YLR386W, YBR276C, YGL116W, YPR119W, YMR…
GO:0016192	vesicle-mediated transport	9.64987626746788e-05	3.63186912588177e-08	260	3295	373	5841	0.00%	0	YOR016C, YKL203C, YOR181W, YJL204C, YMR237W, YLR148W, YPR095C, YJR005W, YDL234C, YER166W, YIL044C, YCR027C, YDL058W, YOR299W, YOR106W, YDL146W, YNL272C, YOL018C, YOR326W, YNL020C, YLR096W, YLR093C, YLR229C, YOR109W, YER143W, YLR268W, YKL126W, YBL007C, YLR039C, YLR166C, YIL048W, YKR003W, YPL085W, YAL002W, YGL145W, YPL176C, YBR207W, YPL249C, YGR198W, YBR172C, YNL297C, YDL161W, YML099C, YIL109C, YJR…
GO:0007163	establishment or maintenance of cell polarity	0.000136131	5.1234868243063e-08	95	3295	119	5841	0.00%	0	YNL243W, YJL095W, YKL203C, YOR181W, YDR166C, YPL174C, YLR319C, YPL031C, YBR210W, YLR084C, YMR273C, YNL271C, YPL115C, YER166W, YGR014W, YOR299W, YER008C, YNL006W, YOR326W, YNL090W, YHR115C, YJL085W, YPL161C, YOR129C, YKR055W, YIR006C, YOR188W, YMR198W, YER093C, YKL048C, YNL047C, YJR076C, YHR001W, YLR229C, YAL041W, YDR420W, YGL233W, YHR073W, YKR054C, YIL068C, YDR093W, YNL298W, YER118C, YLR166C, YHR…
GO:0010948	negative regulation of cell cycle process	0.000142926	5.37924025354322e-08	48	3295	53	5841	0.00%	0	YJL168C, YGL190C, YOL090W, YGL003C, YNL273W, YKR029C, YJL013C, YIL112W, YMR048W, YER016W, YJL090C, YIL072W, YDR052C, YOR073W, YGR238C, YDL188C, YJL187C, YAL021C, YDL017W, YNL201C, YOR178C, YNL330C, YKL108W, YMR168C, YHR115C, YOR351C, YGL093W, YMR190C, YNL102W, YGL086W, YKL185W, YIL031W, YDL194W, YHR158C, YBR158W, YJL030W, YDR440W, YGL194C, YGR188C, YDL028C, YDL134C, YBR103W, YNL116W, YCR033W, YDR…
GO:0040007	growth	0.000169586	6.38262403202292e-08	105	3295	134	5841	0.00%	0	YKL149C, YIL049W, YDL035C, YNL068C, YBR267W, YKL203C, YKL189W, YOR315W, YMR238W, YOL116W, YIL131C, YHR011W, YJL201W, YHR082C, YGR040W, YPL180W, YGR014W, YNL098C, YDL188C, YPL203W, YLR362W, YOR275C, YER124C, YNL006W, YOR326W, YCL024W, YOR353C, YER093C, YKL048C, YNL047C, YER020W, YLR229C, YJR094C, YJL089W, YHR073W, YJR147W, YDL134C, YHR084W, YNL294C, YKL110C, YCR093W, YDL230W, YGR221C, YPL042C, YNL…
GO:0070727	cellular macromolecule localization	0.000237932	8.95489874935612e-08	276	3295	401	5841	0.00%	0	YNL242W, YMR308C, YLR148W, YBL069W, YPL094C, YJR005W, YER166W, YDL058W, YOR106W, YMR004W, YIL115C, YOL018C, YGR046W, YDR130C, YMR153W, YLR301W, YGR099W, YGL092W, YOR098C, YPL065W, YPL243W, YLR039C, YIR022W, YJR045C, YJR074W, YDR258C, YDR292C, YMR212C, YGL016W, YAL002W, YPR049C, YEL052W, YPL176C, YGR133W, YDR414C, YGR198W, YNL297C, YNL275W, YMR091C, YNL330C, YGR119C, YKL134C, YIL109C, YPL125W, YBR…
GO:0042493	response to drug	0.000239016	8.99570579627759e-08	33	3295	34	5841	0.00%	0	YHL035C, YOR328W, YBR008C, YOR153W, YLR426W, YDR406W, YLR397C, YNL065W, YGR224W, YHR048W, YNL264C, YER125W, YDR011W, YHR032W, YML007W, YGR212W, YIL120W, YOR018W, YBL005W, YPR198W, YNL027W, YKL075C, YKL048C, YIL121W, YNR048W, YGL013C, YDR338C, YGR281W, YOR028C, YNL074C, YEL062W, YBR043C, YMR216C
GO:0042221	response to chemical stimulus	0.000328107	1.23487667026181e-07	253	3295	365	5841	0.00%	0	YDL035C, YHL035C, YJL095W, YDR135C, YGR184C, YPL188W, YIL113W, YHL020C, YOR153W, YHR206W, YLR426W, YBR020W, YPL248C, YGR116W, YAL051W, YIL131C, YFL033C, YNL264C, YNL127W, YGR048W, YBL022C, YNR044W, YML057W, YMR243C, YNL025C, YER174C, YBR216C, YLR362W, YDR256C, YHR204W, YGR023W, YML007W, YLR452C, YAL015C, YGR177C, YDL170W, YPL161C, YNL305C, YOR266W, YKL109W, YBL005W, YIR018W, YBR040W, YGR263C, YPL…
GO:0007059	chromosome segregation	0.000352006	1.3248247692186e-07	109	3295	141	5841	0.00%	0	YBL079W, YNL307C, YFR046C, YJR089W, YIL126W, YDL003W, YLR320W, YOR144C, YBR073W, YER016W, YLR383W, YMR001C, YGR275W, YOR014W, YDR180W, YLR272C, YMR078C, YDR409W, YNL088W, YLR381W, YKL052C, YPR141C, YGL249W, YCR077C, YPL137C, YDR130C, YPL233W, YIL132C, YDL139C, YPL204W, YGR098C, YFR031C, YFR027W, YIR010W, YMR198W, YPL008W, YPL022W, YDR318W, YOL034W, YBL063W, YDR110W, YGR188C, YDR014W, YFL003C, YDL…
GO:0071310	cellular response to organic substance	0.00040754	1.53383692618466e-07	57	3295	66	5841	0.00%	0	YDL035C, YOL067C, YDR216W, YCL055W, YKL116C, YNL042W, YGL133W, YJL095W, YER040W, YGR184C, YOR363C, YLR113W, YHL020C, YHR030C, YDR207C, YFL031W, YDR143C, YAL051W, YIL131C, YDL214C, YMR037C, YML088W, YGR048W, YIL036W, YOL148C, YLR182W, YJL087C, YNL314W, YBL047C, YLR097C, YKL062W, YDL170W, YNL305C, YNL027W, YIR023W, YGL252C, YHR079C, YLR332W, YKR034W, YDR183W, YBR170C, YJL110C, YER020W, YDR372C, YOR…
GO:0051052	regulation of DNA metabolic process	0.00043198	1.62581947250439e-07	62	3295	73	5841	0.00%	0	YOL068C, YHR031C, YJL168C, YPL157W, YDL042C, YDR217C, YOL090W, YIL046W, YNL273W, YIR002C, YOR144C, YOL104C, YMR048W, YGL244W, YLR274W, YOR060C, YER171W, YBR274W, YBR279W, YPR120C, YJL194W, YHR153C, YIL143C, YNL088W, YOL004W, YPR023C, YNL218W, YDR097C, YAL021C, YDL020C, YML061C, YNL330C, YAL015C, YOR123C, YMR190C, YDL101C, YKL185W, YMR075W, YJR046W, YNL039W, YPL128C, YDR069C, YBR098W, YGR280C, YKL…
GO:0030010	establishment of cell polarity	0.000437365	1.64608654111923e-07	74	3295	90	5841	0.00%	0	YNL243W, YJL095W, YOR181W, YDR166C, YPL174C, YLR319C, YBR210W, YLR084C, YMR273C, YNL271C, YPL115C, YGR014W, YOR299W, YER008C, YOR326W, YNL090W, YHR115C, YJL085W, YPL161C, YOR129C, YIR006C, YOR188W, YMR198W, YKL048C, YLR229C, YAL041W, YDR420W, YGL233W, YKR054C, YIL068C, YNL298W, YER118C, YLR166C, YHR129C, YER155C, YLR313C, YGR262C, YLR371W, YER149C, YOL072W, YOR127W, YLR330W, YPR032W, YGR041W, YJR…
GO:0034613	cellular protein localization	0.000543245	2.0445817421842e-07	264	3295	384	5841	0.00%	0	YNL242W, YMR308C, YLR148W, YBL069W, YPL094C, YJR005W, YER166W, YDL058W, YOR106W, YMR004W, YIL115C, YOL018C, YGR046W, YDR130C, YMR153W, YLR301W, YGR099W, YGL092W, YOR098C, YPL065W, YPL243W, YLR039C, YIR022W, YJR045C, YJR074W, YDR258C, YDR292C, YMR212C, YGL016W, YAL002W, YPR049C, YEL052W, YPL176C, YGR133W, YDR414C, YGR198W, YNL297C, YNL275W, YMR091C, YNL330C, YGR119C, YKL134C, YIL109C, YPL125W, YBR…
GO:0045184	establishment of protein localization	0.00065466	2.46390788725285e-07	342	3295	511	5841	0.00%	0	YOR016C, YNL242W, YJL204C, YMR237W, YMR308C, YLR148W, YBL069W, YPL094C, YJR005W, YER166W, YDL058W, YOR299W, YOR106W, YMR004W, YIL115C, YNL272C, YOL018C, YOR326W, YGR046W, YJL212C, YMR153W, YLR301W, YLR384C, YBR170C, YGL092W, YOR109W, YER143W, YLR268W, YHR170W, YOR098C, YPL065W, YPL243W, YLR039C, YNL197C, YLR166C, YIR022W, YIL048W, YJR045C, YJR074W, YDR258C, YPL085W, YDR292C, YMR212C, YGL016W, YAL…
GO:0006950	response to stress	0.000835901	3.14603478552614e-07	464	3295	713	5841	0.00%	0	YBR223C, YMR032W, YDL190C, YNL139C, YNL242W, YER162C, YKR072C, YLR035C, YOR181W, YDL042C, YLR319C, YHR119W, YOL090W, YDL105W, YGR116W, YLR320W, YBR289W, YGL244W, YJL090C, YDR489W, YBL022C, YBR279W, YMR172W, YER174C, YJL081C, YOR106W, YLR362W, YNL085W, YLR032W, YHR204W, YCR092C, YGR023W, YOR178C, YHL023C, YGL175C, YDR317W, YAL015C, YOR047C, YDR501W, YDR074W, YLR260W, YKR019C, YLR183C, YER185W, YBL…
GO:0051056	regulation of small GTPase mediated signal transduction	0.000954489	3.59235657072564e-07	41	3295	45	5841	0.00%	0	YER155C, YGR100W, YNL293W, YOL078W, YEL022W, YLR371W, YPR095C, YLR425W, YMR055C, YCL014W, YDR170C, YBR140C, YGL181W, YDL234C, YPL115C, YIL044C, YPL249C, YAL024C, YGR070W, YMR218C, YMR232W, YMR192W, YJR031C, YOR370C, YPL242C, YJL044C, YOR070C, YLR310C, YKL092C, YBL060W, YFL027C, YKR090W, YER122C, YDR407C, YHL029C, YAL041W, YOL081W, YOR371C, YCR038C, YOL112W, YAL056W
GO:0009894	regulation of catabolic process	0.000991915	3.73321571228913e-07	83	3295	104	5841	0.00%	0	YGL240W, YDR490C, YER059W, YNL224C, YBL105C, YOR363C, YKL203C, YNL293W, YBR128C, YLR431C, YPL031C, YAL051W, YOL116W, YDR389W, YOL136C, YDL240W, YBR140C, YPL075W, YGL181W, YDL234C, YDR081C, YPL115C, YIL044C, YOL100W, YNL199C, YMR258C, YMR218C, YDL020C, YNR026C, YPL161C, YER021W, YPL242C, YDR214W, YDL139C, YDR320C, YOR070C, YER122C, YGL116W, YLR345W, YIL075C, YHL029C, YIL050W, YOL081W, YFR017C, YOL…
GO:0015031	protein transport	0.00119454	4.49582009088305e-07	331	3295	495	5841	0.00%	0	YOR016C, YNL242W, YJL204C, YMR237W, YMR308C, YLR148W, YBL069W, YPL094C, YJR005W, YER166W, YDL058W, YOR299W, YOR106W, YMR004W, YIL115C, YNL272C, YOL018C, YOR326W, YGR046W, YJL212C, YMR153W, YLR301W, YLR384C, YBR170C, YGL092W, YOR109W, YER143W, YLR268W, YHR170W, YOR098C, YPL065W, YPL243W, YLR039C, YNL197C, YLR166C, YIR022W, YIL048W, YJR045C, YJR074W, YDR258C, YPL085W, YDR292C, YGL016W, YAL002W, YPR…
GO:0019220	regulation of phosphate metabolic process	0.00120066	4.51885028751968e-07	62	3295	74	5841	0.00%	0	YLR210W, YER059W, YPR025C, YIL113W, YOR171C, YBR045C, YPL031C, YDL006W, YGR108W, YPL256C, YGR186W, YGL244W, YJL090C, YPL219W, YER125W, YBR279W, YPR120C, YDR052C, YNL025C, YGL134W, YDL159W, YOR208W, YDL179W, YDL155W, YLR362W, YGL215W, YJL187C, YAL031C, YML051W, YBL056W, YHR071W, YHL007C, YJL128C, YGR109C, YPL137C, YLR260W, YGR098C, YOL001W, YNL054W, YER075C, YNL053W, YIL147C, YDR103W, YOL145C, YMR…
GO:0051174	regulation of phosphorus metabolic process	0.00120066	4.51885028751968e-07	62	3295	74	5841	0.00%	0	YLR210W, YER059W, YPR025C, YIL113W, YOR171C, YBR045C, YPL031C, YDL006W, YGR108W, YPL256C, YGR186W, YGL244W, YJL090C, YPL219W, YER125W, YBR279W, YPR120C, YDR052C, YNL025C, YGL134W, YDL159W, YOR208W, YDL179W, YDL155W, YLR362W, YGL215W, YJL187C, YAL031C, YML051W, YBL056W, YHR071W, YHL007C, YJL128C, YGR109C, YPL137C, YLR260W, YGR098C, YOL001W, YNL054W, YER075C, YNL053W, YIL147C, YDR103W, YOL145C, YMR…
GO:0007124	pseudohyphal growth	0.00149616	5.63100789626717e-07	54	3295	63	5841	0.00%	0	YKL149C, YIL049W, YDL035C, YNL197C, YNL068C, YLR313C, YER113C, YMR016C, YDR207C, YER149C, YNL119W, YOR315W, YOR140W, YOR127W, YMR238W, YDL024C, YOL116W, YIL131C, YHR011W, YDR107C, YNL098C, YDL159W, YLR362W, YDR379W, YOR032C, YHL007C, YHR111W, YKL185W, YDR043C, YJR153W, YKL048C, YDR251W, YKL043W, YLR353W, YMR316W, YER020W, YLR229C, YJR094C, YOR030W, YER109C, YBR083W, YOR371C, YJR147W, YLL021W, YHR…
GO:0007266	Rho protein signal transduction	0.00155344	5.8465921908899e-07	25	3295	25	5841	0.00%	0	YLR313C, YER155C, YPL161C, YKL203C, YNL283C, YLR319C, YER149C, YLR371W, YOR008C, YKR090W, YLR425W, YNL180C, YER114C, YCL014W, YDR309C, YHR061C, YLR229C, YAL041W, YPL115C, YLL021W, YBL085W, YOL105C, YGR070W, YNL298W, YMR232W
GO:0050793	regulation of developmental process	0.00155344	5.8465921908899e-07	25	3295	25	5841	0.00%	0	YDL223C, YLR313C, YKL185W, YCL024W, YER149C, YLR342W, YKL189W, YER075C, YHR158C, YMR306W, YDR309C, YHR061C, YLR229C, YPR054W, YMR104C, YLL021W, YAR014C, YOR208W, YCL027W, YCR089W, YGR032W, YNL309W, YGL197W, YGR056W, YMR232W
GO:0044182	filamentous growth of a population of unicellular organisms	0.00162271	6.10728296063645e-07	66	3295	80	5841	0.00%	0	YKL149C, YIL049W, YDL035C, YNL068C, YOR315W, YMR238W, YOL116W, YIL131C, YHR011W, YGR040W, YNL098C, YPL203W, YLR362W, YOR275C, YER124C, YKL048C, YER020W, YLR229C, YJR094C, YJL089W, YJR147W, YHR073W, YNL294C, YHR084W, YCR093W, YDL230W, YPL049C, YNL197C, YLR313C, YER113C, YDR207C, YMR016C, YER149C, YOR127W, YOR140W, YNL119W, YDL024C, YBR095C, YDR107C, YDL159W, YER027C, YDR379W, YHL007C, YOR032C, YHR…
GO:0070783	growth of unicellular organism as a thread of attached cells	0.00162271	6.10728296063645e-07	66	3295	80	5841	0.00%	0	YKL149C, YIL049W, YDL035C, YNL068C, YOR315W, YMR238W, YOL116W, YIL131C, YHR011W, YGR040W, YNL098C, YPL203W, YLR362W, YOR275C, YER124C, YKL048C, YER020W, YLR229C, YJR094C, YJL089W, YJR147W, YHR073W, YNL294C, YHR084W, YCR093W, YDL230W, YPL049C, YNL197C, YLR313C, YER113C, YDR207C, YMR016C, YER149C, YOR127W, YOR140W, YNL119W, YDL024C, YBR095C, YDR107C, YDL159W, YER027C, YDR379W, YHL007C, YOR032C, YHR…
GO:0031329	regulation of cellular catabolic process	0.00180353	6.78784750038567e-07	77	3295	96	5841	0.00%	0	YGL240W, YDR490C, YER059W, YNL224C, YBL105C, YOR363C, YKL203C, YNL293W, YBR128C, YLR431C, YPL031C, YAL051W, YOL116W, YDR389W, YOL136C, YDL240W, YBR140C, YPL075W, YGL181W, YDL234C, YDR081C, YPL115C, YIL044C, YOL100W, YNL199C, YMR258C, YMR218C, YDL020C, YNR026C, YPL161C, YPL242C, YDR214W, YDL139C, YDR320C, YOR070C, YER122C, YGL116W, YLR345W, YHL029C, YIL050W, YOL081W, YFR017C, YOL112W, YDR216W, YER…
GO:0006270	DNA-dependent DNA replication initiation	0.0024932	9.38350360177046e-07	42	3295	47	5841	0.00%	0	YIL150C, YPR019W, YJL168C, YPR135W, YDR310C, YBL023C, YIL046W, YLR274W, YOR060C, YJL090C, YIR008C, YLL004W, YDR052C, YJL194W, YMR078C, YLR002C, YLR381W, YOL004W, YPR023C, YLR117C, YGL201C, YDL017W, YNL330C, YKL108W, YBL035C, YNL102W, YML065W, YBR060C, YMR075W, YJR046W, YKL022C, YKL045W, YPL008W, YPL181W, YHR118C, YMR043W, YAL013W, YEL032W, YLR103C, YPR162C, YNL261W, YPL153C
GO:0030447	filamentous growth	0.0025965	9.77228155532065e-07	76	3295	95	5841	0.00%	0	YKL149C, YIL049W, YDL035C, YNL068C, YOR315W, YMR238W, YOL116W, YIL131C, YHR011W, YJL201W, YHR082C, YGR040W, YGR014W, YNL098C, YPL203W, YLR362W, YOR275C, YER124C, YKL048C, YER020W, YLR229C, YJR094C, YJL089W, YJR147W, YHR073W, YNL294C, YHR084W, YCR093W, YDL230W, YPL042C, YPL049C, YER118C, YPL268W, YNL197C, YLR313C, YER113C, YDR207C, YMR016C, YER149C, YOR127W, YOR140W, YNL119W, YDL024C, YBR095C, YDR…
GO:0071900	regulation of protein serine/threonine kinase activity	0.00320328	1.20559983013285e-06	32	3295	34	5841	0.00%	0	YLR210W, YER059W, YPR025C, YIL113W, YDL006W, YGR108W, YPL256C, YPL219W, YPR120C, YGL134W, YNL025C, YDL159W, YOR208W, YDL179W, YDL155W, YGL215W, YJL187C, YBL056W, YHR071W, YJL128C, YGR109C, YOL001W, YNL053W, YER075C, YMR199W, YBR276C, YMR036C, YPR119W, YIL050W, YAL040C, YLR079W, YER089C
GO:0006302	double-strand break repair	0.003247	1.22205554413454e-06	71	3295	88	5841	0.00%	0	YIL150C, YPR019W, YNL307C, YDL042C, YLL002W, YIL126W, YDL003W, YLR320W, YOR005C, YBR289W, YOR144C, YBR073W, YJL090C, YLR383W, YDR489W, YDR180W, YMR078C, YDL059C, YOL004W, YLR032W, YGR056W, YKL108W, YKL213C, YGL175C, YFR027W, YPL022W, YNL250W, YLR135W, YDL074C, YLR103C, YNL262W, YDR227W, YDR075W, YMR076C, YPL121C, YLR442C, YPR135W, YOR290C, YBL023C, YHR164C, YOL146W, YLR274W, YFL008W, YDR369C, YMR…
GO:0046578	regulation of Ras protein signal transduction	0.00408951	1.53914653720332e-06	38	3295	42	5841	0.00%	0	YER155C, YGR100W, YNL293W, YOL078W, YEL022W, YLR371W, YPR095C, YLR425W, YMR055C, YCL014W, YDR170C, YBR140C, YGL181W, YDL234C, YPL115C, YIL044C, YPL249C, YGR070W, YMR218C, YMR232W, YMR192W, YJR031C, YOR370C, YPL242C, YJL044C, YOR070C, YKL092C, YBL060W, YFL027C, YKR090W, YER122C, YDR407C, YHL029C, YAL041W, YOL081W, YOR371C, YOL112W, YAL056W
GO:0051049	regulation of transport	0.00432528	1.62788086184945e-06	54	3295	64	5841	0.00%	0	YNL197C, YKR021W, YPR009W, YGR184C, YKL203C, YDR189W, YHR030C, YLR228C, YLR148W, YDR164C, YLR342W, YLR371W, YCR084C, YGR217W, YIL114C, YKL038W, YER125W, YER151C, YER107C, YGL162W, YPL177C, YGR097W, YJL093C, YMR192W, YNL020C, YPR115W, YML099C, YNR026C, YDR080W, YBR112C, YJR040W, YIL095W, YNL229C, YDR126W, YNL027W, YGL095C, YLR368W, YMR231W, YOR008C, YNL053W, YCR067C, YNR051C, YPR181C, YPL045W, YLR…
GO:0032502	developmental process	0.00472403	1.77795781716759e-06	196	3295	281	5841	0.00%	0	YDL035C, YJL168C, YNL307C, YDL042C, YLR319C, YHR119W, YOL090W, YDR218C, YDR185C, YAL051W, YIL131C, YAL009W, YIL065C, YFL033C, YLR213C, YBR273C, YDL240W, YOR242C, YJL090C, YGL192W, YCL048W, YPR024W, YPR192W, YMR104C, YPR054W, YJL103C, YDR256C, YER180C, YCR092C, YGR056W, YMR145C, YOR326W, YGL175C, YFR048W, YBR040W, YPL015C, YPL008W, YMR306W, YBR023C, YPL022W, YLR229C, YGR059W, YHR004C, YGL107C, YIL…
GO:0033365	protein localization to organelle	0.00695044	2.61589698900964e-06	196	3295	282	5841	0.00%	0	YKL068W, YNL242W, YGL223C, YBL079W, YGR141W, YHR108W, YOL009C, YMR308C, YER154W, YJL061W, YML097C, YPL094C, YGR033C, YJL222W, YMR089C, YMR004W, YDR358W, YLR335W, YIL115C, YPR125W, YHR083W, YBL017C, YIL149C, YOL018C, YGL153W, YML071C, YGR046W, YOR266W, YDR130C, YMR153W, YLR417W, YJL210W, YOR216C, YLR347C, YKL124W, YGR099W, YGL092W, YOL082W, YDR372C, YDL107W, YOR098C, YDL113C, YPL065W, YPL243W, YJL…
GO:0048869	cellular developmental process	0.00704583	2.65180074264933e-06	153	3295	214	5841	0.00%	0	YJL168C, YNL307C, YHR119W, YOL090W, YDR218C, YDR185C, YAL051W, YIL131C, YAL009W, YLR213C, YBR273C, YDL240W, YOR242C, YJL090C, YGL192W, YCL048W, YPR192W, YMR104C, YPR054W, YJL103C, YER180C, YCR092C, YGR056W, YOR326W, YGL175C, YFR048W, YBR040W, YPL008W, YMR306W, YBR023C, YPL022W, YLR229C, YGR059W, YHR004C, YGL107C, YIL073C, YNL294C, YCL027W, YPL121C, YBL066C, YOR338W, YGL170C, YLR342W, YCR045C, YHR…

## Sheet: (i) Function
	(i) alpha_phi < 0.1 : GO function
GOID	TERM	CORRECTED_PVALUE	UNCORRECTED_PVALUE	NUM_LIST_ANNOTATIONS	LIST_SIZE	TOTAL_NUM_ANNOTATIONS	POPULATION_SIZE	FDR_RATE	EXPECTED_FALSE_POSITIVES	ANNOTATED_GENES
GO:0003677	DNA binding	8.10036885164886e-26	8.55371578843597e-29	399	3295	505	5841	0.00%	0	YNL139C, YER162C, YOR083W, YLR035C, YOL090W, YBR297W, YPL248C, YKL222C, YOR341W, YGL244W, YBL022C, YLR375W, YBL008W, YJL103C, YLR032W, YCR092C, YPR190C, YGL249W, YGL175C, YAL015C, YBR163W, YBR123C, YDL170W, YKL109W, YGR071C, YLR403W, YMR153W, YER064C, YDL220C, YPR065W, YGL013C, YPR022C, YGR099W, YGL209W, YOR380W, YEL055C, YLR266C, YNL261W, YJL206C, YGL131C, YDL164C, YLR398C, YKR099W, YOR290C, YDR…
GO:0005488	binding	1.0637706278185e-24	1.12330583718955e-27	1725	3295	2695	5841	0.00%	0	YKL168C, YKL203C, YHR119W, YMR237W, YDR140W, YKL205W, YIR035C, YLR085C, YHR033W, YKL222C, YFL030W, YGL244W, YLR375W, YER166W, YNL062C, YNR044W, YML057W, YGL236C, YJL081C, YLR362W, YHL014C, YOL138C, YDL119C, YCR092C, YNL272C, YMR012W, YGL175C, YHR115C, YAL015C, YFR032C, YBR163W, YNL155W, YKL109W, YML075C, YDR501W, YDR130C, YKR019C, YPL207W, YOR250C, YGL179C, YPR031W, YJL162C, YER152C, YLR093C, YIL…
GO:0001071	nucleic acid binding transcription factor activity	3.6638065744958e-18	3.86885593927751e-21	159	3295	180	5841	0.00%	0	YOR083W, YPR009W, YLR014C, YHR206W, YBR297W, YPL248C, YGR116W, YAL051W, YIL131C, YKL222C, YER111C, YBR279W, YMR172W, YJL103C, YDR145W, YMR270C, YML007W, YMR168C, YBR123C, YDL170W, YKL109W, YBL005W, YLR403W, YMR236W, YIR018W, YOR172W, YHR124W, YPR065W, YGL013C, YGL209W, YOR380W, YNR063W, YJR147W, YDR303C, YIL101C, YLR266C, YLR141W, YJL206C, YFL021W, YML015C, YGL112C, YBL066C, YIL130W, YDR207C, YDR…
GO:0003700	sequence-specific DNA binding transcription factor activity	3.6638065744958e-18	3.86885593927751e-21	159	3295	180	5841	0.00%	0	YOR083W, YPR009W, YLR014C, YHR206W, YBR297W, YPL248C, YGR116W, YAL051W, YIL131C, YKL222C, YER111C, YBR279W, YMR172W, YJL103C, YDR145W, YMR270C, YML007W, YMR168C, YBR123C, YDL170W, YKL109W, YBL005W, YLR403W, YMR236W, YIR018W, YOR172W, YHR124W, YPR065W, YGL013C, YGL209W, YOR380W, YNR063W, YJR147W, YDR303C, YIL101C, YLR266C, YLR141W, YJL206C, YFL021W, YML015C, YGL112C, YBL066C, YIL130W, YDR207C, YDR…
GO:0004672	protein kinase activity	3.68675429468984e-18	3.89308795637786e-21	125	3295	135	5841	0.00%	0	YDR490C, YKL168C, YJL095W, YBL105C, YAR019C, YOR267C, YKL203C, YDR466W, YNL307C, YLR113W, YOL113W, YHR205W, YJL141C, YGL119W, YPL031C, YKL101W, YKL166C, YCR073C, YFL029C, YDR247W, YBR097W, YFL033C, YJL057C, YMR001C, YHR082C, YGR092W, YGR040W, YBR274W, YMR104C, YPR054W, YDR422C, YPL203W, YLR362W, YOL100W, YPR111W, YOR231W, YNL020C, YDL025C, YOR351C, YOL045W, YIL095W, YLR096W, YGL180W, YCL024W, YPL…
GO:0004674	protein serine/threonine kinase activity	7.85077032422232e-17	8.29014817763708e-20	119	3295	129	5841	0.00%	0	YDR490C, YKL168C, YJL095W, YBL105C, YAR019C, YOR267C, YKL203C, YDR466W, YNL307C, YLR113W, YOL113W, YHR205W, YJL141C, YGL119W, YPL031C, YKL101W, YKL166C, YCR073C, YFL029C, YDR247W, YBR097W, YFL033C, YJL057C, YMR001C, YHR082C, YGR092W, YGR040W, YBR274W, YMR104C, YPR054W, YDR422C, YPL203W, YLR362W, YOL100W, YPR111W, YOR231W, YNL020C, YDL025C, YOR351C, YOL045W, YIL095W, YLR096W, YGL180W, YCL024W, YPL…
GO:0016773	phosphotransferase activity, alcohol group as acceptor	1.62862165818051e-16	1.71976943841659e-19	167	3295	194	5841	0.00%	0	YKL168C, YJL095W, YKL203C, YPL188W, YDR466W, YNL307C, YLR305C, YOL113W, YGL119W, YBR020W, YPL031C, YKL101W, YKL166C, YFL053W, YFL033C, YDR315C, YJL057C, YMR104C, YPR054W, YEL041W, YDR422C, YPL203W, YLR362W, YPR111W, YDR196C, YOL055C, YNL020C, YOR351C, YOL045W, YIL095W, YLR096W, YLR260W, YDR017C, YPL204W, YPL026C, YGL179C, YMR291W, YLR345W, YPL140C, YKL126W, YKL025C, YNR047W, YPL042C, YPL153C, YDR…
GO:0005524	ATP binding	1.97856425941871e-16	2.08929700044214e-19	442	3295	604	5841	0.00%	0	YKL168C, YIR016W, YDR135C, YLR035C, YKL203C, YOR153W, YOL090W, YKL166C, YHL050C, YOR011W, YBL022C, YBR084W, YER166W, YMR104C, YEL041W, YPL203W, YLR362W, YPL104W, YLR032W, YPR111W, YCR092C, YDR196C, YPL217C, YOR326W, YNL020C, YOR351C, YOL045W, YLR096W, YLR260W, YOR250C, YGL179C, YKL194C, YLR345W, YPL140C, YNL132W, YLR361C, YPL058C, YKL126W, YCR011C, YNL261W, YPL042C, YLR419W, YKR024C, YDL164C, YKL…
GO:0032559	adenyl ribonucleotide binding	2.49939862923965e-16	2.63928049550121e-19	443	3295	606	5841	0.00%	0	YKL168C, YIR016W, YDR135C, YLR035C, YKL203C, YOR153W, YOL090W, YKL166C, YHL050C, YOR011W, YBL022C, YBR084W, YER166W, YMR104C, YEL041W, YPL203W, YLR362W, YPL104W, YLR032W, YPR111W, YCR092C, YDR196C, YPL217C, YOR326W, YNL020C, YOR351C, YOL045W, YLR096W, YLR260W, YOR250C, YGL179C, YKL194C, YLR345W, YPL140C, YNL132W, YLR361C, YPL058C, YKL126W, YCR011C, YNL261W, YPL042C, YLR419W, YKR024C, YDL164C, YKL…
GO:0030554	adenyl nucleotide binding	5.32185770018041e-16	5.61970190092968e-19	444	3295	609	5841	0.00%	0	YKL168C, YIR016W, YDR135C, YLR035C, YKL203C, YOR153W, YOL090W, YKL166C, YHL050C, YOR011W, YBL022C, YBR084W, YER166W, YMR104C, YEL041W, YPL203W, YLR362W, YPL104W, YLR032W, YPR111W, YCR092C, YDR196C, YPL217C, YOR326W, YNL020C, YOR351C, YOL045W, YLR096W, YLR260W, YOR250C, YGL179C, YKL194C, YLR345W, YPL140C, YNL132W, YLR361C, YPL058C, YKL126W, YCR011C, YNL261W, YPL042C, YLR419W, YKR024C, YDL164C, YKL…
GO:0043565	sequence-specific DNA binding	5.6599052916405e-15	5.97666873457286e-18	193	3295	234	5841	0.00%	0	YML113W, YOR083W, YPR009W, YBR267W, YPR019W, YHR206W, YPL248C, YAL051W, YIL131C, YKL222C, YER111C, YLR375W, YJL103C, YMR070W, YML007W, YMR168C, YBR123C, YDL170W, YLR403W, YIR018W, YOR172W, YDL220C, YHR124W, YPR065W, YGL013C, YPR022C, YPL230W, YGR099W, YGL209W, YOR380W, YNR063W, YJR147W, YDR303C, YLR103C, YIL101C, YLR266C, YNL261W, YFL021W, YPL153C, YER164W, YKR099W, YIL130W, YDR207C, YDR421W, YFL…
GO:0016301	kinase activity	9.57717263205785e-13	1.01131706779914e-15	180	3295	221	5841	0.00%	0	YKL168C, YJL095W, YKL203C, YPL188W, YDR466W, YNL307C, YLR305C, YOL113W, YGL119W, YBR020W, YPL031C, YKL101W, YKL166C, YHR033W, YFL053W, YFL033C, YDR315C, YPR121W, YJL057C, YMR104C, YPR054W, YEL041W, YDR422C, YPL203W, YLR362W, YPR111W, YDR196C, YOL055C, YNL020C, YOR351C, YOL045W, YIL095W, YLR096W, YLR260W, YDR017C, YPL204W, YPL026C, YGL179C, YMR291W, YLR345W, YOL061W, YPL140C, YKL126W, YKL025C, YNR…
GO:0035639	purine ribonucleoside triphosphate binding	1.19130793974012e-10	1.25798092897584e-13	486	3295	703	5841	0.00%	0	YKL168C, YIR016W, YDR135C, YLR035C, YKL203C, YOR153W, YOL090W, YDR218C, YKL166C, YHL050C, YOR011W, YBL022C, YBR084W, YER166W, YCR027C, YMR104C, YEL041W, YPL203W, YLR362W, YPL104W, YHL014C, YLR032W, YPR111W, YCR092C, YDR196C, YPL217C, YOR326W, YNL020C, YOR351C, YOL045W, YKR055W, YLR096W, YLR260W, YOR250C, YGL179C, YKL194C, YLR345W, YPL140C, YLR229C, YGR059W, YNL132W, YLR361C, YPL058C, YKL126W, YCR…
GO:0032553	ribonucleotide binding	1.38455409155579e-10	1.46204233532818e-13	487	3295	705	5841	0.00%	0	YKL168C, YIR016W, YDR135C, YLR035C, YKL203C, YOR153W, YOL090W, YDR218C, YKL166C, YHL050C, YOR011W, YBL022C, YBR084W, YER166W, YCR027C, YMR104C, YEL041W, YPL203W, YLR362W, YPL104W, YHL014C, YLR032W, YPR111W, YCR092C, YDR196C, YPL217C, YOR326W, YNL020C, YOR351C, YOL045W, YKR055W, YLR096W, YLR260W, YOR250C, YGL179C, YKL194C, YLR345W, YPL140C, YLR229C, YGR059W, YNL132W, YLR361C, YPL058C, YKL126W, YCR…
GO:0032555	purine ribonucleotide binding	1.38455409155579e-10	1.46204233532818e-13	487	3295	705	5841	0.00%	0	YKL168C, YIR016W, YDR135C, YLR035C, YKL203C, YOR153W, YOL090W, YDR218C, YKL166C, YHL050C, YOR011W, YBL022C, YBR084W, YER166W, YCR027C, YMR104C, YEL041W, YPL203W, YLR362W, YPL104W, YHL014C, YLR032W, YPR111W, YCR092C, YDR196C, YPL217C, YOR326W, YNL020C, YOR351C, YOL045W, YKR055W, YLR096W, YLR260W, YOR250C, YGL179C, YKL194C, YLR345W, YPL140C, YLR229C, YGR059W, YNL132W, YLR361C, YPL058C, YKL126W, YCR…
GO:0017076	purine nucleotide binding	1.86476813808821e-10	1.96913214159262e-13	489	3295	709	5841	0.00%	0	YKL168C, YIR016W, YDR135C, YLR035C, YKL203C, YOR153W, YOL090W, YDR218C, YKL166C, YHL050C, YOR011W, YBL022C, YBR084W, YER166W, YCR027C, YMR104C, YEL041W, YPL203W, YLR362W, YPL104W, YHL014C, YLR032W, YPR111W, YCR092C, YDR196C, YPL217C, YOR326W, YNL020C, YOR351C, YOL045W, YKR055W, YLR096W, YLR260W, YOR250C, YGL179C, YKL194C, YLR345W, YPL140C, YLR229C, YGR059W, YNL132W, YLR361C, YPL058C, YKL126W, YCR…
GO:0008270	zinc ion binding	2.68092063169853e-09	2.83096159630257e-12	231	3295	308	5841	0.00%	0	YPR009W, YBR267W, YDL246C, YGR184C, YLR014C, YDL042C, YBR297W, YKL005C, YLR148W, YPL248C, YAL061W, YKR029C, YBL069W, YAL051W, YKL222C, YOR341W, YDL240W, YMR089C, YDR313C, YLR375W, YIL044C, YOL138C, YJL103C, YLR032W, YMR070W, YHR115C, YMR168C, YOR116C, YDL170W, YNL155W, YBL005W, YLR403W, YOR172W, YDR448W, YOL066C, YLR417W, YPL015C, YPR031W, YML068W, YGL013C, YPR022C, YPL230W, YGL209W, YKL059C, YDR…
GO:0016772	transferase activity, transferring phosphorus-containing groups	7.84748819946815e-09	8.28668236480269e-12	235	3295	316	5841	0.00%	0	YKL168C, YJL095W, YKL203C, YPL188W, YDR466W, YNL307C, YHL012W, YLR305C, YOL113W, YGL119W, YBR020W, YGR202C, YPL031C, YKL101W, YKL166C, YHR033W, YFL053W, YFL033C, YDR315C, YOR341W, YPR121W, YJL057C, YGR007W, YMR104C, YPR054W, YEL041W, YDR422C, YPL203W, YLR362W, YPR111W, YPR113W, YDR196C, YPR190C, YFL036W, YOL055C, YNL020C, YOR116C, YOR351C, YOL045W, YIL095W, YLR096W, YLR260W, YDR419W, YDR017C, YPL…
GO:0000981	sequence-specific DNA binding RNA polymerase II transcription factor activity	1.51708034430575e-08	1.60198558004831e-11	80	3295	90	5841	0.00%	0	YNL068C, YDR423C, YOR083W, YOR363C, YLR228C, YPL248C, YAL051W, YIL131C, YCR042C, YPL075W, YLL054C, YBR279W, YMR172W, YLR451W, YGL035C, YDR096W, YDR145W, YDL020C, YNL167C, YDL170W, YOR358W, YPR008W, YKL109W, YBL005W, YMR236W, YIR018W, YPR065W, YGL013C, YGL209W, YDR213W, YJL089W, YKR064W, YLR266C, YFL021W, YPL202C, YML114C, YDR216W, YCR065W, YML015C, YOL067C, YGL112C, YDR310C, YDR207C, YDR421W, YFL…
GO:0003676	nucleic acid binding	4.03999654260093e-08	4.2660998337919e-11	636	3295	966	5841	0.00%	0	YNL139C, YOR083W, YLR035C, YHR119W, YOL090W, YBR297W, YDR140W, YKL205W, YHR033W, YHL050C, YKL222C, YGL244W, YLR277C, YLR375W, YNL062C, YBL008W, YPL104W, YCR092C, YPL217C, YGL249W, YGL175C, YAL015C, YFR032C, YBR163W, YKL109W, YBR233W, YOR250C, YDL220C, YGR099W, YGL209W, YOR243C, YEL055C, YBR065C, YGL131C, YLR419W, YDL164C, YDR151C, YLR398C, YLR059C, YLR116W, YKR086W, YDL112W, YOR140W, YEL077C, YLR…
GO:0016787	hydrolase activity	2.67190513681573e-07	2.82144153834818e-10	582	3295	883	5841	0.00%	0	YPL095C, YDR135C, YLR035C, YDL042C, YOL090W, YBR001C, YGR116W, YMR238W, YHL050C, YNL217W, YLR143W, YLR277C, YOL042W, YDL122W, YER166W, YML057W, YCR027C, YMR087W, YJL081C, YNL085W, YHR204W, YCR092C, YPL217C, YKL212W, YDR331W, YGL175C, YAL015C, YBR163W, YIL084C, YNL099C, YIL075C, YDR430C, YLR229C, YOR109W, YPL058C, YMR223W, YOR076C, YPL253C, YLR419W, YKR053C, YLR398C, YLR059C, YJR045C, YDR258C, YOR…
GO:0000166	nucleotide binding	1.22578379899489e-06	1.29438627137792e-09	595	3295	910	5841	0.00%	0	YKL168C, YDR135C, YLR035C, YKL203C, YDL042C, YOL090W, YIR035C, YBL069W, YHL050C, YER166W, YCR027C, YPL203W, YLR362W, YPL104W, YHL014C, YCR092C, YDR196C, YPL217C, YGL249W, YFR032C, YML075C, YPL207W, YOR250C, YGL179C, YLR229C, YGR059W, YPL058C, YEL055C, YKL126W, YJR159W, YOR076C, YPL042C, YLR460C, YLR419W, YDL164C, YLR398C, YJR045C, YJR049C, YDR258C, YLR248W, YGR262C, YKR086W, YHR102W, YEL077C, YCR…
GO:0030234	enzyme regulator activity	1.56067918278253e-06	1.64802448023498e-09	172	3295	229	5841	0.00%	0	YGL240W, YER059W, YKR072C, YPR095C, YLR073C, YGR108W, YML097C, YDL240W, YJR053W, YJL090C, YPL219W, YDL234C, YOR014W, YIL044C, YNL025C, YDL155W, YLR181C, YNL272C, YBR050C, YOR178C, YGR233C, YBL046W, YLR452C, YOR047C, YPL161C, YDR367W, YER021W, YPL242C, YDR214W, YOR070C, YBL060W, YGR280C, YPL152W, YDL220C, YLR347C, YER093C, YGL116W, YIL106W, YPR119W, YIL075C, YHL029C, YIL050W, YGR166W, YFR017C, YJL…
GO:0042623	ATPase activity, coupled	6.83866157525701e-06	7.22139553881416e-09	140	3295	183	5841	0.00%	0	YML127W, YJL050W, YHL035C, YER013W, YDR135C, YPR019W, YOR153W, YOL090W, YKR103W, YGL251C, YHL050C, YGL171W, YBR073W, YOR011W, YBL022C, YDR243C, YLR424W, YER166W, YPR024W, YJL081C, YIL143C, YLR032W, YCR092C, YGR056W, YNL059C, YOL095C, YJL033W, YPL008W, YDR194C, YPL058C, YDR303C, YGR271W, YKL188C, YCR011C, YNR038W, YDR093W, YLR419W, YER164W, YKR024C, YOR328W, YLR398C, YIL048W, YKL078W, YHR031C, YOR…
GO:0016887	ATPase activity	6.92670214731229e-06	7.31436340793273e-09	182	3295	247	5841	0.00%	0	YML127W, YJL050W, YHL035C, YER013W, YDR135C, YPR019W, YLR035C, YOR153W, YOL090W, YFR013W, YKR103W, YGL251C, YHL050C, YGL171W, YBR073W, YOR011W, YBL022C, YMR089C, YDR243C, YLR424W, YER166W, YPR024W, YJL081C, YIL143C, YLR032W, YCR092C, YGR056W, YNL059C, YOL095C, YJL033W, YPL008W, YDR194C, YPL058C, YDR303C, YGR271W, YKL188C, YCR011C, YNR038W, YDR093W, YLR419W, YER164W, YKR024C, YOR328W, YLR398C, YIL…
GO:0008094	DNA-dependent ATPase activity	7.51083119410859e-06	7.93118394309249e-09	58	3295	65	5841	0.00%	0	YML127W, YOR217W, YBR114W, YHR031C, YPR019W, YOR290C, YOL090W, YIL126W, YHR164C, YER173W, YMR033W, YJR052W, YBR073W, YOR191W, YDL154W, YLR430W, YER171W, YPR034W, YJL081C, YIL143C, YNL088W, YBR087W, YHR120W, YLR032W, YFR037C, YNL218W, YHR056C, YCR092C, YCR052W, YDR097C, YDR004W, YGL201C, YMR091C, YGR056W, YLR357W, YNL059C, YMR190C, YKR008W, YJR035W, YOL095C, YGL163C, YPL008W, YDR076W, YKL017C, YNL…
GO:0003824	catalytic activity	1.90997816622944e-05	2.01687240362137e-08	1341	3295	2198	5841	0.00%	0	YKL168C, YPL095C, YPL189W, YKL203C, YHR119W, YDR140W, YIR035C, YMR238W, YHR033W, YFL030W, YPR121W, YER166W, YNL062C, YML057W, YJL081C, YLR362W, YCR092C, YGL257C, YGL175C, YHR115C, YAL015C, YGR177C, YBR163W, YML075C, YPL207W, YGL179C, YPR031W, YER152C, YIL075C, YDR430C, YLR229C, YOR109W, YDL040C, YGR093W, YKL126W, YMR223W, YPR001W, YLR419W, YDL164C, YLR059C, YLL051C, YJR045C, YPR131C, YDR258C, YKR…
GO:0003682	chromatin binding	2.15037208979971e-05	2.27072026378006e-08	64	3295	74	5841	0.00%	0	YML127W, YDR295C, YDL042C, YFR013W, YGR116W, YDL003W, YLR085C, YOR144C, YCR042C, YBR279W, YBL008W, YJL194W, YJL081C, YNL021W, YDR145W, YML041C, YKR101W, YDR501W, YMR236W, YDL139C, YLR183C, YGL207W, YDR448W, YFR027W, YJR140C, YGR270W, YBR215W, YDR440W, YLR103C, YDR227W, YKL110C, YOL006C, YLR263W, YER164W, YML015C, YGL112C, YLR442C, YPR135W, YBL023C, YMR005W, YLR274W, YGR274C, YLL004W, YOR038C, YLR…
GO:0036094	small molecule binding	3.31295041309705e-05	3.49836368859245e-08	622	3295	968	5841	0.00%	0	YKL168C, YDR135C, YLR035C, YKL203C, YDL042C, YOL090W, YIR035C, YBL069W, YHL050C, YFL030W, YER166W, YCR027C, YPL203W, YLR362W, YPL104W, YHL014C, YCR092C, YDR196C, YPL217C, YGL249W, YFR032C, YML075C, YPL207W, YOR250C, YGL179C, YHR112C, YER152C, YLR229C, YGR059W, YPL058C, YEL055C, YKL126W, YMR296C, YJR159W, YOR076C, YPL042C, YLR460C, YLR419W, YDL164C, YLR398C, YJR045C, YJR049C, YDR258C, YLR248W, YGR…
GO:0004386	helicase activity	3.70146226126481e-05	3.90861907208534e-08	80	3295	97	5841	0.00%	0	YJL050W, YER013W, YPR019W, YIL126W, YGL251C, YIR002C, YHL050C, YBL111C, YGL171W, YBR073W, YOR191W, YGR296W, YGL064C, YLR430W, YDR243C, YLR424W, YJL081C, YIL143C, YLR032W, YDL031W, YNL059C, YER176W, YGL120C, YGR005C, YOL095C, YJL033W, YFR038W, YLR276C, YPL008W, YDR194C, YOR141C, YGR271W, YLR466W, YNR038W, YLR419W, YPL283C, YER164W, YKR024C, YLR398C, YBR114W, YHR031C, YKL078W, YOR290C, YBL023C, YPL…
GO:0000982	RNA polymerase II core promoter proximal region sequence-specific DNA binding transcription factor activity	5.08986326379032e-05	5.37472361540689e-08	51	3295	57	5841	0.00%	0	YDR216W, YOR363C, YDR310C, YDR207C, YLR228C, YPL248C, YAL051W, YIL131C, YHR006W, YMR037C, YPL075W, YIL036W, YLR451W, YER028C, YGL035C, YDR096W, YDL020C, YGL166W, YDR123C, YKL062W, YNL167C, YMR280C, YDL170W, YOR358W, YKL109W, YBL005W, YLR131C, YLR256W, YKL015W, YKL185W, YDR043C, YPL128C, YNL027W, YER045C, YER169W, YPR199C, YPR065W, YGL013C, YGL209W, YDR213W, YJL089W, YER109C, YDL106C, YBR083W, YDR…
GO:0001067	regulatory region nucleic acid binding	5.40155125497696e-05	5.70385560187641e-08	67	3295	79	5841	0.00%	0	YOR083W, YER040W, YOR363C, YPL190C, YLR228C, YPL248C, YAL051W, YIL131C, YIL056W, YPL007C, YPL075W, YKL038W, YBL022C, YMR070W, YGL035C, YDR096W, YDL020C, YNL167C, YBR123C, YDL170W, YOR358W, YIR023W, YJL056C, YGL209W, YDR213W, YJL089W, YML027W, YLR266C, YPL202C, YDR216W, YDR310C, YDR207C, YAL001C, YOR140W, YOR295W, YHR006W, YMR037C, YGR047C, YPL177C, YOR110W, YER028C, YGR044C, YLR176C, YGL166W, YKL…
GO:0030695	GTPase regulator activity	5.47721551356375e-05	5.78375450217925e-08	79	3295	96	5841	0.00%	0	YPL241C, YDR495C, YNL293W, YPR095C, YLR425W, YDR389W, YML097C, YDL240W, YJR053W, YBR140C, YGL181W, YDL234C, YIL119C, YPL115C, YIL044C, YMR258C, YNL272C, YMR218C, YLR452C, YNR026C, YPL161C, YDR137W, YLR422W, YPL242C, YOR070C, YBL060W, YER122C, YLR347C, YER093C, YPR181C, YHL029C, YAL041W, YOL081W, YGR166W, YOL112W, YLR039C, YER155C, YGR100W, YDR211W, YPR017C, YEL022W, YLR371W, YOR127W, YGL164C, YMR…
GO:0005515	protein binding	6.75503223732578e-05	7.13308578387094e-08	408	3295	615	5841	0.00%	0	YMR032W, YER059W, YLR429W, YKL203C, YOR181W, YJL204C, YLR319C, YKL005C, YLR148W, YPL248C, YKL205W, YGR116W, YER016W, YJL090C, YLL022C, YPL219W, YOL087C, YBR279W, YNR044W, YML057W, YNL025C, YOR057W, YOR106W, YDL155W, YLR362W, YNL199C, YMR270C, YOR178C, YOL018C, YOR326W, YKL109W, YDR130C, YPR031W, YMR198W, YJL162C, YLR093C, YIL075C, YBR170C, YER143W, YJR097W, YLR268W, YNL311C, YPL065W, YMR223W, YDR…
GO:0046914	transition metal ion binding	7.43216347202019e-05	7.84811348682175e-08	265	3295	383	5841	0.00%	0	YDL042C, YBR297W, YKL005C, YLR148W, YPL248C, YBL069W, YKL222C, YOR341W, YLR375W, YIL044C, YOL138C, YJL103C, YLR032W, YHR115C, YDL170W, YNL155W, YLR403W, YJR078W, YPL015C, YPR031W, YML068W, YGL013C, YPR022C, YGL209W, YKL059C, YDR430C, YOR380W, YJR159W, YMR223W, YLR266C, YJL206C, YDR459C, YLR136C, YGL131C, YLR460C, YLR214W, YDR151C, YLL051C, YLR116W, YIL130W, YDR421W, YLR005W, YAL002W, YLR323C, YHR…
GO:0000975	regulatory region DNA binding	8.20990681130751e-05	8.66938417244721e-08	66	3295	78	5841	0.00%	0	YOR083W, YER040W, YOR363C, YLR228C, YPL248C, YAL051W, YIL131C, YIL056W, YPL007C, YPL075W, YKL038W, YBL022C, YMR070W, YGL035C, YDR096W, YDL020C, YNL167C, YBR123C, YDL170W, YOR358W, YIR023W, YJL056C, YGL209W, YDR213W, YJL089W, YML027W, YLR266C, YPL202C, YDR216W, YDR310C, YDR207C, YAL001C, YOR140W, YOR295W, YHR006W, YMR037C, YGR047C, YPL177C, YOR110W, YER028C, YGR044C, YLR176C, YGL166W, YKL062W, YMR…
GO:0044212	transcription regulatory region DNA binding	8.20990681130751e-05	8.66938417244721e-08	66	3295	78	5841	0.00%	0	YOR083W, YER040W, YOR363C, YLR228C, YPL248C, YAL051W, YIL131C, YIL056W, YPL007C, YPL075W, YKL038W, YBL022C, YMR070W, YGL035C, YDR096W, YDL020C, YNL167C, YBR123C, YDL170W, YOR358W, YIR023W, YJL056C, YGL209W, YDR213W, YJL089W, YML027W, YLR266C, YPL202C, YDR216W, YDR310C, YDR207C, YAL001C, YOR140W, YOR295W, YHR006W, YMR037C, YGR047C, YPL177C, YOR110W, YER028C, YGR044C, YLR176C, YGL166W, YKL062W, YMR…
GO:0000976	transcription regulatory region sequence-specific DNA binding	0.000100939	1.06587802443072e-07	63	3295	74	5841	0.00%	0	YDR216W, YOR083W, YER040W, YOR363C, YDR310C, YDR207C, YLR228C, YAL001C, YPL248C, YOR140W, YOR295W, YAL051W, YIL131C, YHR006W, YIL056W, YPL007C, YMR037C, YGR047C, YPL075W, YKL038W, YOR110W, YPL177C, YER028C, YGR044C, YMR070W, YGL035C, YDR096W, YDL020C, YLR176C, YGL166W, YKL062W, YNL167C, YMR280C, YBR123C, YDL170W, YOR358W, YLR131C, YLR256W, YKL185W, YKL015W, YDR043C, YPL128C, YNL027W, YIR023W, YPR…
GO:0017111	nucleoside-triphosphatase activity	0.00028666	3.02703208261427e-07	249	3295	361	5841	0.00%	0	YML127W, YJL050W, YHL035C, YER013W, YDR135C, YPR019W, YLR035C, YOR153W, YOL090W, YFR013W, YBR186W, YKR103W, YGL251C, YIR002C, YHL050C, YNL180C, YGL171W, YBR073W, YOR011W, YBL022C, YMR089C, YDR243C, YLR424W, YER166W, YPR024W, YCR027C, YHR023W, YJL081C, YMR078C, YIL143C, YLR032W, YCR092C, YPL217C, YGR056W, YOR326W, YNL059C, YBR179C, YER176W, YKR055W, YGR005C, YOL095C, YJL033W, YMR198W, YPL008W, YDR…
GO:0019899	enzyme binding	0.000427935	4.51885028751968e-07	62	3295	74	5841	0.00%	0	YKR021W, YDR113C, YLR210W, YER059W, YPR025C, YJR074W, YFR022W, YOR329C, YDR228C, YGR068C, YOL078W, YDR289C, YBR045C, YKL205W, YAL002W, YPR032W, YDR005C, YGR108W, YPR030W, YPR086W, YGL198W, YDR309C, YPL219W, YPL089C, YHR061C, YNL271C, YBR279W, YPR120C, YNL025C, YGL134W, YDL179W, YDL155W, YGL215W, YGL161C, YAL031C, YLR127C, YBL101C, YHR071W, YNL167C, YGR109C, YOR370C, YPL137C, YKR062W, YOR018W, YLR…
GO:0016740	transferase activity	0.00049654	5.2432903453087e-07	479	3295	740	5841	0.00%	0	YKL168C, YEL020C, YPL095C, YPL189W, YKL203C, YHR119W, YDR140W, YGR202C, YOR149C, YKL166C, YHR033W, YML082W, YFL030W, YOR341W, YPR121W, YFL060C, YBR084W, YLR209C, YNL062C, YGR007W, YMR104C, YJL081C, YEL041W, YPL203W, YLR362W, YPR111W, YDR196C, YPR190C, YGL257C, YNL020C, YGR177C, YOR351C, YOL045W, YLR096W, YLR260W, YAR035W, YNL038W, YGL179C, YPR031W, YBR023C, YBR003W, YER152C, YLR345W, YPL140C, YEL…
GO:0000977	RNA polymerase II regulatory region sequence-specific DNA binding	0.000736439	7.77654275672424e-07	48	3295	55	5841	0.00%	0	YDR216W, YOR083W, YER040W, YOR363C, YDR310C, YDR207C, YLR228C, YPL248C, YOR140W, YAL051W, YIL131C, YHR006W, YIL056W, YPL075W, YKL038W, YPL177C, YER028C, YGR044C, YMR070W, YGL035C, YDR096W, YDL020C, YLR176C, YGL166W, YNL167C, YMR280C, YDL170W, YOR358W, YLR256W, YKL015W, YDR043C, YPL128C, YIR023W, YPR199C, YJL056C, YOR162C, YGL209W, YDR213W, YJL089W, YER109C, YDL106C, YDR034C, YPL133C, YBR083W, YGL…
GO:0046872	metal ion binding	0.00131129	1.38467784940042e-06	470	3295	729	5841	0.00%	0	YEL020C, YDL042C, YJR089W, YBR297W, YKL005C, YLR148W, YBR001C, YPL248C, YBL069W, YOR360C, YKL222C, YOR341W, YCL018W, YLR277C, YLR375W, YER166W, YML057W, YIL044C, YER174C, YOL138C, YJL103C, YLR032W, YHR204W, YHR115C, YDL170W, YNL155W, YGR071C, YLR403W, YKR019C, YJR078W, YPL207W, YPL015C, YPR031W, YML068W, YGL013C, YPR022C, YBR003W, YIL106W, YGL209W, YKL059C, YDR430C, YOR380W, YJR097W, YLL029W, YDL…
GO:0005083	small GTPase regulator activity	0.0015416	1.62788086184945e-06	54	3295	64	5841	0.00%	0	YDR495C, YER155C, YGR100W, YNL293W, YEL022W, YLR371W, YOR127W, YPR095C, YLR425W, YMR055C, YDR389W, YOR134W, YDL240W, YCL014W, YDR170C, YBR140C, YDR309C, YHR061C, YGL181W, YDL234C, YIL119C, YPL115C, YIL044C, YPL249C, YDR379W, YGR070W, YMR218C, YMR232W, YMR192W, YFL047W, YNR026C, YJR031C, YDR080W, YDR472W, YPL242C, YJL044C, YOR070C, YLR310C, YKL092C, YBL060W, YFL027C, YKR090W, YCR067C, YER122C, YLR…
GO:0019207	kinase regulator activity	0.00226236	2.38897196376003e-06	40	3295	45	5841	0.00%	0	YLR210W, YER059W, YPR025C, YFL029C, YGR108W, YPL256C, YLR226W, YJL090C, YPL219W, YPR120C, YDR052C, YGL134W, YNL025C, YDL179W, YDL155W, YGL215W, YML051W, YCL051W, YGR233C, YHR071W, YNL006W, YGR109C, YOR047C, YOL001W, YLR006C, YMR199W, YIL106W, YPR119W, YOR039W, YIL050W, YGL115W, YGL019W, YAL040C, YOR371C, YPR185W, YLR079W, YJL157C, YHR136C, YCL032W, YAL056W
GO:0001012	RNA polymerase II regulatory region DNA binding	0.00233297	2.4635414040548e-06	48	3295	56	5841	0.00%	0	YDR216W, YOR083W, YER040W, YOR363C, YDR310C, YDR207C, YLR228C, YPL248C, YOR140W, YAL051W, YIL131C, YHR006W, YIL056W, YPL075W, YKL038W, YPL177C, YER028C, YGR044C, YMR070W, YGL035C, YDR096W, YDL020C, YLR176C, YGL166W, YNL167C, YMR280C, YDL170W, YOR358W, YLR256W, YKL015W, YDR043C, YPL128C, YIR023W, YPR199C, YJL056C, YOR162C, YGL209W, YDR213W, YJL089W, YER109C, YDL106C, YDR034C, YPL133C, YBR083W, YGL…
GO:0043167	ion binding	0.00240757	2.54231209498265e-06	481	3295	750	5841	0.00%	0	YEL020C, YDL042C, YJR089W, YBR297W, YKL005C, YLR148W, YBR001C, YPL248C, YBL069W, YOR360C, YKL222C, YOR341W, YCL018W, YLR277C, YLR375W, YER166W, YML057W, YIL044C, YER174C, YOL138C, YJL103C, YLR032W, YHR204W, YHR115C, YDL170W, YNL155W, YGR071C, YLR403W, YKR019C, YJR078W, YPL207W, YPL015C, YPR031W, YML068W, YGL013C, YPR022C, YBR003W, YIL106W, YGL209W, YKL059C, YDR430C, YOR380W, YJR097W, YLL029W, YDL…
GO:0043169	cation binding	0.00240757	2.54231209498265e-06	481	3295	750	5841	0.00%	0	YEL020C, YDL042C, YJR089W, YBR297W, YKL005C, YLR148W, YBR001C, YPL248C, YBL069W, YOR360C, YKL222C, YOR341W, YCL018W, YLR277C, YLR375W, YER166W, YML057W, YIL044C, YER174C, YOL138C, YJL103C, YLR032W, YHR204W, YHR115C, YDL170W, YNL155W, YGR071C, YLR403W, YKR019C, YJR078W, YPL207W, YPL015C, YPR031W, YML068W, YGL013C, YPR022C, YBR003W, YIL106W, YGL209W, YKL059C, YDR430C, YOR380W, YJR097W, YLL029W, YDL…
GO:0001159	core promoter proximal region DNA binding	0.00291247	3.07547453502217e-06	50	3295	59	5841	0.00%	0	YDR216W, YER040W, YOR363C, YDR310C, YDR207C, YLR228C, YPL248C, YOR140W, YOR295W, YAL051W, YIL131C, YHR006W, YMR037C, YPL075W, YKL038W, YPL177C, YER028C, YGR044C, YMR070W, YGL035C, YDR096W, YDL020C, YGL166W, YKL062W, YNL167C, YMR280C, YDL170W, YOR358W, YLR131C, YLR256W, YKL015W, YKL185W, YDR043C, YPL128C, YNL027W, YIR023W, YPR199C, YGL209W, YMR042W, YDR213W, YJL089W, YER109C, YDL106C, YBR083W, YDR…
GO:0000978	RNA polymerase II core promoter proximal region sequence-specific DNA binding	0.00322489	3.40537280839264e-06	42	3295	48	5841	0.00%	0	YDR216W, YER040W, YOR363C, YDR310C, YDR207C, YLR228C, YPL248C, YOR140W, YAL051W, YIL131C, YHR006W, YPL075W, YKL038W, YPL177C, YER028C, YGR044C, YMR070W, YGL035C, YDR096W, YDL020C, YGL166W, YNL167C, YMR280C, YDL170W, YOR358W, YLR256W, YKL015W, YDR043C, YPL128C, YIR023W, YPR199C, YGL209W, YDR213W, YJL089W, YER109C, YDL106C, YDR034C, YPL133C, YBR083W, YGL237C, YLR266C, YPL202C
GO:0005099	Ras GTPase activator activity	0.00385501	4.07075795102169e-06	26	3295	27	5841	0.00%	0	YMR192W, YFL047W, YER155C, YGR100W, YNL293W, YJL044C, YPL242C, YOR070C, YKL092C, YOR127W, YFL027C, YMR055C, YDR389W, YOR134W, YDL240W, YMR235C, YBR140C, YDR309C, YHR061C, YDL234C, YHL029C, YPL115C, YOL081W, YPL249C, YOL112W, YDR379W
GO:0000987	core promoter proximal region sequence-specific DNA binding	0.00442116	4.66859669273521e-06	49	3295	58	5841	0.00%	0	YDR216W, YER040W, YOR363C, YDR310C, YDR207C, YLR228C, YPL248C, YOR140W, YOR295W, YAL051W, YIL131C, YHR006W, YMR037C, YPL075W, YKL038W, YPL177C, YER028C, YGR044C, YMR070W, YGL035C, YDR096W, YDL020C, YGL166W, YKL062W, YNL167C, YMR280C, YDL170W, YOR358W, YLR131C, YLR256W, YKL015W, YKL185W, YDR043C, YPL128C, YNL027W, YIR023W, YPR199C, YGL209W, YMR042W, YDR213W, YJL089W, YER109C, YDL106C, YBR083W, YDR…
GO:0016788	hydrolase activity, acting on ester bonds	0.00563289	5.94814578220484e-06	189	3295	273	5841	0.00%	0	YKL149C, YBR223C, YPL095C, YIL113W, YGL144C, YOR022C, YDR036C, YGR116W, YOR360C, YOL065C, YAL009W, YNL217W, YLR143W, YLR277C, YOL042W, YOR014W, YDL122W, YML057W, YAR008W, YMR087W, YDL188C, YML059C, YNL085W, YPL103C, YDL109C, YNL201C, YGR233C, YKL212W, YHR076W, YGL175C, YAL015C, YER041W, YBR163W, YGR247W, YDR074W, YDL102W, YOR166C, YPL022W, YOR001W, YNL099C, YLR345W, YOR109W, YHR004C, YLR361C, YLR…
GO:0019887	protein kinase regulator activity	0.00569931	6.01827507834764e-06	38	3295	43	5841	0.00%	0	YLR210W, YER059W, YPR025C, YFL029C, YGR108W, YPL256C, YLR226W, YJL090C, YPL219W, YPR120C, YDR052C, YGL134W, YNL025C, YDL179W, YDL155W, YGL215W, YCL051W, YHR071W, YGR233C, YNL006W, YGR109C, YOR047C, YOL001W, YLR006C, YMR199W, YPR119W, YOR039W, YIL050W, YGL115W, YGL019W, YAL040C, YOR371C, YPR185W, YLR079W, YJL157C, YHR136C, YCL032W, YAL056W
GO:0003684	damaged DNA binding	0.00661303	6.9831391528601e-06	25	3295	26	5841	0.00%	0	YER162C, YBR114W, YKL032C, YOL090W, YMR137C, YDR419W, YML060W, YJR052W, YDR314C, YMR201C, YOR346W, YLR383W, YOL034W, YCR066W, YER095W, YER171W, YMR284W, YML095C, YPL096W, YOR368W, YHR120W, YMR106C, YCR092C, YDR499W, YDR097C
GO:0016462	pyrophosphatase activity	0.00738183	7.79496344280906e-06	256	3295	382	5841	0.00%	0	YDR135C, YLR035C, YOR153W, YOL090W, YHL050C, YOR011W, YBL022C, YER166W, YCR027C, YJL081C, YLR032W, YCR092C, YPL217C, YOR326W, YKR055W, YMR198W, YLR229C, YPL058C, YCR011C, YOR076C, YPL253C, YLR419W, YKR024C, YMR299C, YLR398C, YIL048W, YJR045C, YDR258C, YOR290C, YDR292C, YOR092W, YBR142W, YKR086W, YEL077C, YNL014W, YER047C, YNL339C, YDL154W, YOL075C, YML133C, YPL119C, YPL270W, YPL074W, YOR165W, YDR…
GO:0016817	hydrolase activity, acting on acid anhydrides	0.00738183	7.79496344280906e-06	256	3295	382	5841	0.00%	0	YDR135C, YLR035C, YOR153W, YOL090W, YHL050C, YOR011W, YBL022C, YER166W, YCR027C, YJL081C, YLR032W, YCR092C, YPL217C, YOR326W, YKR055W, YMR198W, YLR229C, YPL058C, YCR011C, YOR076C, YPL253C, YLR419W, YKR024C, YMR299C, YLR398C, YIL048W, YJR045C, YDR258C, YOR290C, YDR292C, YOR092W, YBR142W, YKR086W, YEL077C, YNL014W, YER047C, YNL339C, YDL154W, YOL075C, YML133C, YPL119C, YPL270W, YPL074W, YOR165W, YDR…
GO:0016818	hydrolase activity, acting on acid anhydrides, in phosphorus-containing anhydrides	0.00738183	7.79496344280906e-06	256	3295	382	5841	0.00%	0	YDR135C, YLR035C, YOR153W, YOL090W, YHL050C, YOR011W, YBL022C, YER166W, YCR027C, YJL081C, YLR032W, YCR092C, YPL217C, YOR326W, YKR055W, YMR198W, YLR229C, YPL058C, YCR011C, YOR076C, YPL253C, YLR419W, YKR024C, YMR299C, YLR398C, YIL048W, YJR045C, YDR258C, YOR290C, YDR292C, YOR092W, YBR142W, YKR086W, YEL077C, YNL014W, YER047C, YNL339C, YDL154W, YOL075C, YML133C, YPL119C, YPL270W, YPL074W, YOR165W, YDR…
GO:0043566	structure-specific DNA binding	0.00820964	8.6691026176365e-06	74	3295	95	5841	0.00%	0	YIL150C, YNL068C, YPR019W, YLR035C, YOL090W, YIR002C, YIL131C, YNL206C, YBL022C, YMR167W, YDL059C, YLR032W, YNL218W, YCR092C, YKL108W, YGL175C, YMR153W, YBR278W, YFR031C, YDL220C, YOL145C, YKL045W, YPL022W, YPR175W, YER161C, YOL034W, YLR233C, YNL250W, YFL003C, YNL262W, YDR227W, YOL006C, YLR263W, YER164W, YCR065W, YLR442C, YDR217C, YBL023C, YHR164C, YOL072W, YPR104C, YPL122C, YGL169W, YLR274W, YFL…

## Sheet: (i) Component
	(i) alpha_phi < 0.1 : GO component
GOID	TERM	CORRECTED_PVALUE	UNCORRECTED_PVALUE	NUM_LIST_ANNOTATIONS	LIST_SIZE	TOTAL_NUM_ANNOTATIONS	POPULATION_SIZE	FDR_RATE	EXPECTED_FALSE_POSITIVES	ANNOTATED_GENES
GO:0005623	cell	3.5448488828938e-55	5.43688478971442e-58	3017	3295	4963	5841	0.00%	0	YDR140W, YMR238W, YDR275W, YEL015W, YNL062C, YCL048W, YNR044W, YGL236C, YJL081C, YHR194W, YHL014C, YCR092C, YGL257C, YHR115C, YGR177C, YBR163W, YBR129C, YKL109W, YJL043W, YML075C, YDR501W, YDR130C, YPL158C, YOR250C, YPL247C, YLR384C, YLR093C, YIL075C, YGR059W, YDL040C, YKR100C, YGR093W, YKL126W, YMR223W, YPR001W, YGL131C, YDL164C, YLR059C, YLL051C, YJR045C, YIL158W, YLR248W, YKR086W, YDL112W, YCR…
GO:0044464	cell part	3.5448488828938e-55	5.43688478971442e-58	3017	3295	4963	5841	0.00%	0	YDR140W, YMR238W, YDR275W, YEL015W, YNL062C, YCL048W, YNR044W, YGL236C, YJL081C, YHR194W, YHL014C, YCR092C, YGL257C, YHR115C, YGR177C, YBR163W, YBR129C, YKL109W, YJL043W, YML075C, YDR501W, YDR130C, YPL158C, YOR250C, YPL247C, YLR384C, YLR093C, YIL075C, YGR059W, YDL040C, YKR100C, YGR093W, YKL126W, YMR223W, YPR001W, YGL131C, YDL164C, YLR059C, YLL051C, YJR045C, YIL158W, YLR248W, YKR086W, YDL112W, YCR…
GO:0005622	intracellular	6.74962758076556e-31	1.03521895410515e-33	2747	3295	4530	5841	0.00%	0	YDR140W, YDR275W, YEL015W, YNL062C, YGL236C, YJL081C, YHR194W, YHL014C, YCR092C, YGL257C, YHR115C, YGR177C, YBR163W, YBR129C, YKL109W, YJL043W, YML075C, YDR501W, YDR130C, YOR250C, YPL247C, YLR384C, YLR093C, YIL075C, YGR059W, YDL040C, YKR100C, YGR093W, YKL126W, YMR223W, YPR001W, YGL131C, YDL164C, YLR059C, YLL051C, YJR045C, YIL158W, YLR248W, YKR086W, YDL112W, YCR036W, YJL005W, YPR049C, YAL002W, YCL…
GO:0044424	intracellular part	3.34844189037243e-29	5.13564707112336e-32	2730	3295	4507	5841	0.00%	0	YDR140W, YDR275W, YEL015W, YNL062C, YGL236C, YJL081C, YHR194W, YHL014C, YCR092C, YGL257C, YHR115C, YGR177C, YBR163W, YBR129C, YKL109W, YJL043W, YML075C, YDR501W, YDR130C, YOR250C, YPL247C, YLR384C, YLR093C, YIL075C, YGR059W, YDL040C, YKR100C, YGR093W, YKL126W, YMR223W, YPR001W, YGL131C, YDL164C, YLR059C, YLL051C, YJR045C, YIL158W, YLR248W, YKR086W, YDL112W, YCR036W, YJL005W, YPR049C, YAL002W, YCL…
GO:0043227	membrane-bounded organelle	1.22245348896952e-23	1.87492866406368e-26	2216	3295	3581	5841	0.00%	0	YDR140W, YNL062C, YGL236C, YJL081C, YHR194W, YHL014C, YCR092C, YGL257C, YGR177C, YBR163W, YBR129C, YKL109W, YJL043W, YML075C, YDR501W, YDR130C, YOR250C, YPL247C, YLR384C, YLR093C, YIL075C, YDL040C, YGR093W, YMR223W, YPR001W, YGL131C, YDL164C, YLR059C, YLL051C, YJR045C, YIL158W, YKR086W, YCR036W, YJL005W, YAL002W, YCL031C, YJL076W, YNL236W, YGR133W, YDR414C, YCR068W, YPL236C, YPL270W, YJL098W, YPR…
GO:0043231	intracellular membrane-bounded organelle	1.22245348896952e-23	1.87492866406368e-26	2216	3295	3581	5841	0.00%	0	YDR140W, YNL062C, YGL236C, YJL081C, YHR194W, YHL014C, YCR092C, YGL257C, YGR177C, YBR163W, YBR129C, YKL109W, YJL043W, YML075C, YDR501W, YDR130C, YOR250C, YPL247C, YLR384C, YLR093C, YIL075C, YDL040C, YGR093W, YMR223W, YPR001W, YGL131C, YDL164C, YLR059C, YLL051C, YJR045C, YIL158W, YKR086W, YCR036W, YJL005W, YAL002W, YCL031C, YJL076W, YNL236W, YGR133W, YDR414C, YCR068W, YPL236C, YPL270W, YJL098W, YPR…
GO:0005634	nucleus	7.00603874096214e-21	1.07454581916597e-23	1284	3295	1961	5841	0.00%	0	YHR119W, YDR140W, YKL205W, YLR085C, YKL222C, YGL244W, YGR275W, YLR375W, YNL062C, YJL081C, YHR194W, YCR092C, YIL115C, YNL215W, YGL175C, YAL015C, YOR047C, YNL155W, YKL109W, YML075C, YDR501W, YDR130C, YOR250C, YPL247C, YPR031W, YJL162C, YLR384C, YER152C, YIL075C, YGR093W, YMR223W, YGL131C, YDL164C, YJR045C, YJR074W, YGL066W, YFL049W, YKR086W, YCR036W, YLR323C, YCL031C, YBR095C, YJL076W, YNL236W, YOR…
GO:0043234	protein complex	6.71797290876936e-16	1.03036394306278e-18	894	3295	1339	5841	0.00%	0	YNL139C, YLR429W, YOR083W, YLR035C, YKL203C, YDL042C, YHR119W, YJR089W, YOL090W, YMR237W, YDR140W, YDL105W, YLR085C, YBR289W, YGL244W, YPL094C, YER016W, YJL090C, YLR277C, YGR275W, YNL062C, YML057W, YBL008W, YJL081C, YOR057W, YPL203W, YOL138C, YCR092C, YIL115C, YMR270C, YMR012W, YOL018C, YKL212W, YDR331W, YKL109W, YDR130C, YPL233W, YIL084C, YOR250C, YNL038W, YPR031W, YDR416W, YLR384C, YGR099W, YLR…
GO:0043226	organelle	9.22568772103024e-15	1.41498277929912e-17	2331	3295	3862	5841	0.00%	0	YDR140W, YEL015W, YNL062C, YGL236C, YJL081C, YHR194W, YHL014C, YCR092C, YGL257C, YGR177C, YBR163W, YBR129C, YKL109W, YJL043W, YML075C, YDR501W, YDR130C, YOR250C, YPL247C, YLR384C, YLR093C, YIL075C, YGR059W, YDL040C, YGR093W, YMR223W, YPR001W, YGL131C, YDL164C, YLR059C, YLL051C, YJR045C, YIL158W, YKR086W, YCR036W, YJL005W, YAL002W, YCL031C, YJL076W, YNL236W, YDR309C, YGR133W, YDR414C, YCR068W, YPL…
GO:0043229	intracellular organelle	9.22568772103024e-15	1.41498277929912e-17	2331	3295	3862	5841	0.00%	0	YDR140W, YEL015W, YNL062C, YGL236C, YJL081C, YHR194W, YHL014C, YCR092C, YGL257C, YGR177C, YBR163W, YBR129C, YKL109W, YJL043W, YML075C, YDR501W, YDR130C, YOR250C, YPL247C, YLR384C, YLR093C, YIL075C, YGR059W, YDL040C, YGR093W, YMR223W, YPR001W, YGL131C, YDL164C, YLR059C, YLL051C, YJR045C, YIL158W, YKR086W, YCR036W, YJL005W, YAL002W, YCL031C, YJL076W, YNL236W, YDR309C, YGR133W, YDR414C, YCR068W, YPL…
GO:0005694	chromosome	5.26527076982416e-13	8.07556866537448e-16	278	3295	366	5841	0.00%	0	YDL042C, YHR119W, YJR089W, YOL090W, YDL105W, YGR116W, YLR085C, YBR289W, YGL244W, YER016W, YJL090C, YDR489W, YBR279W, YBL008W, YJL081C, YLR381W, YLR032W, YCR092C, YGL249W, YDR206W, YDR501W, YDR130C, YPL233W, YLR183C, YIL084C, YDL220C, YPR065W, YGR099W, YIL106W, YMR076C, YNL261W, YGL131C, YLR045C, YDL164C, YDR217C, YGR262C, YMR094W, YMR263W, YIL122W, YLR052W, YMR048W, YJR112W, YBR095C, YDL154W, YHR…
GO:0044427	chromosomal part	8.23968475745843e-12	1.26375533089853e-14	252	3295	331	5841	0.00%	0	YKL033W, YPL126W, YPR019W, YDL042C, YJR089W, YDL105W, YGR116W, YKR029C, YLR085C, YAR003W, YIL131C, YOR144C, YER111C, YGL244W, YER016W, YJL090C, YLR383W, YDR489W, YOR014W, YBR279W, YBL008W, YML102W, YJL081C, YMR078C, YDL188C, YLR381W, YLR032W, YLR335W, YGL249W, YNL059C, YMR168C, YDR206W, YLR288C, YDR501W, YDR130C, YPL233W, YIR018W, YDR419W, YPL204W, YLR183C, YIL084C, YDL102W, YDL220C, YOL145C, YKL…
GO:0000228	nuclear chromosome	3.32496614408623e-11	5.09964132528563e-14	214	3295	276	5841	0.00%	0	YKL033W, YPR019W, YDL042C, YJR089W, YOL090W, YKR029C, YLR085C, YIL131C, YBR289W, YER111C, YJL090C, YDR489W, YOR014W, YGL213C, YJL081C, YMR078C, YDL188C, YLR381W, YLR032W, YLR335W, YCR092C, YNL201C, YGL249W, YNL059C, YMR168C, YLR288C, YDR501W, YDR130C, YPL233W, YIR018W, YLR183C, YIL084C, YDL102W, YDL220C, YHR124W, YKL045W, YJR021C, YPR065W, YBL032W, YGR163W, YAL011W, YPR175W, YGR099W, YNL097C, YLR…
GO:0044454	nuclear chromosome part	1.1532728119619e-10	1.76882333122991e-13	194	3295	248	5841	0.00%	0	YKL033W, YPR019W, YDL042C, YJR089W, YKR029C, YLR085C, YIL131C, YER111C, YJL090C, YDR489W, YOR014W, YJL081C, YMR078C, YDL188C, YLR381W, YLR032W, YLR335W, YGL249W, YNL059C, YMR168C, YLR288C, YDR501W, YDR130C, YPL233W, YIR018W, YLR183C, YIL084C, YDL102W, YDL220C, YKL045W, YPR065W, YBL032W, YGR163W, YAL011W, YPR175W, YGR099W, YNL097C, YLR103C, YNL261W, YGL131C, YER164W, YLR045C, YGR002C, YHR031C, YDR…
GO:0044428	nuclear part	2.06703811298754e-10	3.17030385427537e-13	682	3295	1026	5841	0.00%	0	YNL139C, YOR083W, YLR035C, YDL042C, YHR119W, YJR089W, YOL090W, YGR202C, YKL205W, YLR085C, YBR289W, YGL244W, YJL090C, YLR277C, YGR275W, YBL008W, YJL081C, YCR092C, YIL115C, YDR196C, YMR270C, YPL217C, YGL249W, YKL109W, YML075C, YDR501W, YDR130C, YPL233W, YIL084C, YOR250C, YDL220C, YPR031W, YDR416W, YGR099W, YBR170C, YEL055C, YBR065C, YOR098C, YMR223W, YPL042C, YGL131C, YLR116W, YGL066W, YFL049W, YLR…
GO:0016585	chromatin remodeling complex	8.35025532596638e-08	1.28071400705006e-10	99	3295	118	5841	0.00%	0	YML127W, YHL025W, YKL033W, YLR033W, YPL126W, YDR295C, YDL042C, YHR119W, YDR073W, YFR013W, YIL126W, YDL076C, YKR029C, YMR033W, YLR085C, YAR003W, YBR289W, YKL018W, YGR275W, YPR034W, YOL148C, YCL010C, YJL081C, YOL004W, YPR023C, YGR252W, YNL021W, YDR145W, YLR015W, YGR056W, YML041C, YNL059C, YKR101W, YMR236W, YLR183C, YIL084C, YDR448W, YPL181W, YAL011W, YPR085C, YGR099W, YBR081C, YGL194C, YNL097C, YOR…
GO:0030427	site of polarized growth	1.75801181851925e-07	2.69633714496818e-10	172	3295	226	5841	0.00%	0	YMR032W, YJL095W, YOR181W, YJL204C, YLR319C, YDR218C, YNL233W, YKL101W, YPL269W, YDL240W, YOR014W, YLR190W, YGR238C, YHR023W, YDL146W, YNL272C, YOR326W, YNL020C, YJL085W, YPL221W, YKR055W, YIL095W, YPL158C, YPL242C, YPL204W, YBR040W, YBL060W, YOR353C, YOR264W, YBR023C, YIL106W, YPR119W, YJR076C, YLR229C, YGR059W, YGL233W, YKR100C, YKL126W, YCL027W, YJL157C, YBL007C, YER118C, YLR166C, YIR003W, YCR…
GO:0016020	membrane	3.61159153809189e-07	5.53925082529431e-10	1114	3295	1786	5841	0.00%	0	YPL189W, YKL203C, YMR237W, YKL205W, YIR035C, YMR238W, YNR065C, YDR275W, YHR078W, YER166W, YCL048W, YNR044W, YHR194W, YOL138C, YDL119C, YIL115C, YGL257C, YGR177C, YOR047C, YML075C, YHR017W, YER185W, YLR093C, YOL103W, YLR229C, YGR059W, YPL244C, YKR100C, YKL126W, YLL051C, YJR045C, YIL158W, YOR092W, YCL005W, YJL005W, YPR049C, YGL145W, YJL183W, YDR309C, YDR414C, YCR068W, YPL236C, YPL270W, YMR157C, YOR…
GO:0044451	nucleoplasm part	4.62351741857575e-07	7.09128438431864e-10	190	3295	255	5841	0.00%	0	YNL139C, YOR083W, YPR019W, YHR119W, YKR029C, YAR003W, YIL131C, YER111C, YGL244W, YJL090C, YLL022C, YDR489W, YLR277C, YBR279W, YCL010C, YNL025C, YJL081C, YIL143C, YBL052C, YDR145W, YPR190C, YMR270C, YPL001W, YOR116C, YBR123C, YKL109W, YGR005C, YMR236W, YLR183C, YIL084C, YOR250C, YDR448W, YPR070W, YPR031W, YOL145C, YHR167W, YML062C, YKL059C, YNL097C, YPR068C, YLR103C, YMR223W, YLR141W, YNL261W, YPL…
GO:0005933	cellular bud	9.24324349512859e-07	1.41767538268843e-09	145	3295	188	5841	0.00%	0	YMR032W, YJL204C, YDR218C, YNL233W, YKL101W, YDL240W, YOR014W, YLR190W, YGR238C, YHR023W, YDL146W, YNL272C, YOL158C, YOR326W, YJL085W, YPL221W, YKR055W, YPL158C, YPL242C, YPL204W, YBL060W, YOR353C, YOR264W, YBR023C, YIL106W, YPR119W, YJR076C, YLR229C, YGR059W, YKR100C, YKL126W, YER118C, YCR030C, YGL190C, YHR149C, YHR102W, YER032W, YDR309C, YER125W, YNL161W, YDR507C, YPL249C, YBL085W, YFR016C, YNL…
GO:0005935	cellular bud neck	1.63903173364399e-06	2.51385235221471e-09	112	3295	140	5841	0.00%	0	YMR032W, YAR019C, YJL204C, YDR166C, YNL293W, YDR218C, YNL233W, YDR164C, YKL101W, YPL066W, YER144C, YDL240W, YLR084C, YMR001C, YNL271C, YGR092W, YOR014W, YLR190W, YGR238C, YHR023W, YDR409W, YER008C, YDL146W, YNL272C, YER124C, YOR326W, YNL304W, YJL085W, YHR161C, YOR129C, YPL221W, YKR055W, YKL079W, YPL158C, YPL242C, YCL024W, YPL204W, YBL060W, YOR188W, YKL048C, YOR264W, YBR023C, YIL106W, YPR119W, YJR…
GO:0005654	nucleoplasm	5.13370889097932e-06	7.87378664260632e-09	209	3295	289	5841	0.00%	0	YNL139C, YOR083W, YPR019W, YHL020C, YHR119W, YKR029C, YAR003W, YIL131C, YER111C, YGL244W, YJL090C, YLL022C, YDR489W, YLR277C, YBR279W, YCL010C, YNL025C, YJL081C, YIL143C, YBL052C, YDR145W, YPR190C, YMR270C, YIL149C, YPL001W, YOR116C, YBR123C, YKL109W, YGR005C, YMR236W, YPL204W, YLR183C, YIL084C, YOR250C, YGR280C, YDR448W, YPR070W, YPR031W, YOL145C, YHR167W, YML062C, YKL059C, YNL097C, YPR068C, YLR…
GO:0005774	vacuolar membrane	0.000255437	3.91774264767797e-07	129	3295	173	5841	0.00%	0	YHR028C, YNL176C, YDR229W, YHL035C, YDR135C, YKL203C, YDR281C, YLR148W, YLR297W, YOR292C, YDR119W, YDR313C, YOR106W, YDR422C, YOL138C, YGR125W, YLR001C, YHL023C, YOR326W, YIL067C, YNL305C, YDL180W, YBR077C, YCR044C, YDR128W, YER093C, YGR163W, YBR241C, YLR386W, YKL124W, YLR093C, YDL210W, YBR293W, YLL051C, YMR160W, YIL158W, YCL069W, YBL089W, YOR320C, YBR207W, YJR001W, YNR013C, YPL236C, YIL088C, YDL…
GO:0005938	cell cortex	0.0007597	1.16518435895812e-06	112	3295	149	5841	0.00%	0	YNL243W, YMR032W, YDR490C, YLR429W, YOR181W, YDR166C, YPL174C, YNL293W, YLR319C, YIL002C, YDR218C, YNL233W, YGR130C, YKL101W, YPL269W, YBR130C, YGL181W, YNL271C, YPL115C, YLR407W, YHR023W, YDR409W, YOL100W, YER008C, YDL146W, YLR404W, YDL222C, YGR032W, YMR031C, YNL020C, YJL085W, YHR161C, YOR129C, YCL029C, YHR114W, YIL095W, YIR006C, YPL242C, YCL024W, YBR108W, YKL048C, YJR076C, YHR001W, YER020W, YGR…
GO:0031981	nuclear lumen	0.000769549	1.18028950068284e-06	471	3295	730	5841	0.00%	0	YNL139C, YOR083W, YJL069C, YDL042C, YHR119W, YJR089W, YOL090W, YKL205W, YLR085C, YBR289W, YOR341W, YGL244W, YJL090C, YLL022C, YDR489W, YLR277C, YBR279W, YNL025C, YJL081C, YLR381W, YLR032W, YCR092C, YPR190C, YMR270C, YPL217C, YLR222C, YGL249W, YDL060W, YBR123C, YKL109W, YDR501W, YDR130C, YPL233W, YLR183C, YIL084C, YOR250C, YDL220C, YPR031W, YPR065W, YHR167W, YGR099W, YDL148C, YKL059C, YNL132W, YEL…
GO:0044422	organelle part	0.00117928	1.80871258284522e-06	1522	3295	2543	5841	0.00%	0	YKL203C, YHR119W, YMR237W, YKL205W, YPR095C, YLR085C, YLL003W, YKL222C, YGL244W, YGR275W, YER166W, YJL081C, YHR194W, YOL138C, YDL119C, YCR092C, YIL115C, YGL257C, YGR177C, YER050C, YKL109W, YML075C, YDR501W, YDR130C, YHR017W, YOR250C, YPR031W, YLR093C, YDR430C, YGR059W, YOR109W, YPL244C, YMR223W, YGL131C, YDL164C, YLL051C, YJR045C, YDR258C, YIL158W, YGL066W, YOR092W, YFL049W, YKR086W, YAL002W, YLR…
GO:0044446	intracellular organelle part	0.00117928	1.80871258284522e-06	1522	3295	2543	5841	0.00%	0	YKL203C, YHR119W, YMR237W, YKL205W, YPR095C, YLR085C, YLL003W, YKL222C, YGL244W, YGR275W, YER166W, YJL081C, YHR194W, YOL138C, YDL119C, YCR092C, YIL115C, YGL257C, YGR177C, YER050C, YKL109W, YML075C, YDR501W, YDR130C, YHR017W, YOR250C, YPR031W, YLR093C, YDR430C, YGR059W, YOR109W, YPL244C, YMR223W, YGL131C, YDL164C, YLL051C, YJR045C, YDR258C, YIL158W, YGL066W, YOR092W, YFL049W, YKR086W, YAL002W, YLR…
GO:0005667	transcription factor complex	0.00147435	2.26127190707864e-06	58	3295	70	5841	0.00%	0	YML015C, YCR065W, YPR025C, YNL068C, YGL112C, YOR083W, YER068W, YAL001C, YLR005W, YPR104C, YOR295W, YPL122C, YMR005W, YIL131C, YGR186W, YER111C, YCR042C, YPL007C, YGR274C, YGR047C, YPR056W, YER171W, YOR110W, YLR182W, YIL143C, YDR311W, YIL038C, YAL021C, YDR145W, YMR270C, YNL278W, YKR036C, YDL056W, YGR134W, YBR123C, YOR358W, YKR062W, YKL109W, YGR005C, YNL288W, YNL039W, YMR236W, YMR227C, YDL108W, YML…
GO:0005856	cytoskeleton	0.00173409	2.65965279386601e-06	160	3295	225	5841	0.00%	0	YMR032W, YLR429W, YOR181W, YLR319C, YJR089W, YDR218C, YNL233W, YDR171W, YKL101W, YLL003W, YML104C, YPL269W, YKL222C, YER016W, YJR053W, YOR014W, YDL058W, YHR023W, YDL146W, YIL149C, YOR326W, YNL020C, YIL095W, YDR130C, YPL233W, YPL242C, YPL204W, YBR108W, YMR198W, YIL106W, YPR119W, YJR076C, YGR059W, YOR109W, YPL253C, YBL007C, YOR269W, YMR299C, YLR045C, YDR113C, YIR003W, YGL170C, YLR342W, YAL047C, YOR…
GO:0005886	plasma membrane	0.00205403	3.15035637627183e-06	251	3295	371	5841	0.00%	0	YDL035C, YNL318C, YLL055W, YKL203C, YLR305C, YOR153W, YOL113W, YDR132C, YIR032C, YDR497C, YNR055C, YPL092W, YKL051W, YMR238W, YOL152W, YOR161C, YNL180C, YGR121C, YBL106C, YKL220C, YIR039C, YJR005W, YOR011W, YKL135C, YMR275C, YER166W, YCL048W, YPR192W, YCR027C, YGR023W, YJR160C, YOL158C, YMR031C, YLR452C, YOR047C, YOL156W, YLR138W, YJR040W, YKR055W, YLR096W, YJL212C, YPL204W, YER185W, YDR261C, YBL…
GO:0044437	vacuolar part	0.003083	4.72853184742453e-06	133	3295	184	5841	0.00%	0	YHR028C, YNL176C, YDR229W, YHL035C, YOR223W, YDR135C, YKL203C, YDR281C, YLR148W, YLR297W, YOR292C, YDR119W, YDR313C, YOR106W, YDR422C, YOL138C, YGR125W, YLR001C, YHL023C, YOR326W, YIL067C, YNL305C, YDL180W, YBR077C, YCR044C, YDR128W, YER093C, YGR163W, YBR241C, YLR386W, YKL124W, YLR093C, YDL210W, YBR293W, YLL051C, YMR160W, YIL158W, YCL069W, YBL089W, YOR320C, YBR207W, YJR001W, YNR013C, YCR068W, YPL…
GO:0044430	cytoskeletal part	0.00367619	5.63832380521839e-06	150	3295	211	5841	0.00%	0	YMR032W, YLR429W, YOR181W, YLR319C, YJR089W, YDR218C, YNL233W, YKL101W, YML104C, YLL003W, YPL269W, YKL222C, YER016W, YJR053W, YOR014W, YHR023W, YDL146W, YIL149C, YOR326W, YNL020C, YIL095W, YDR130C, YPL233W, YPL242C, YPL204W, YBR108W, YMR198W, YIL106W, YPR119W, YJR076C, YGR059W, YOR109W, YPL253C, YBL007C, YOR269W, YMR299C, YLR045C, YDR113C, YIR003W, YGL170C, YLR342W, YAL047C, YOR060C, YDR309C, YHR…
GO:0000131	incipient cellular bud site	0.00705639	1.08226837720068e-05	42	3295	49	5841	0.00%	0	YNL243W, YLR313C, YER155C, YDR166C, YNL293W, YNL233W, YHR149C, YLR371W, YKL189W, YHR102W, YER144C, YDR309C, YMR273C, YHR061C, YNL271C, YPL115C, YNL161W, YLR190W, YHR023W, YPL249C, YDL179W, YER008C, YHL007C, YMR192W, YOR326W, YNL304W, YBR200W, YKL079W, YCL024W, YKR090W, YOR353C, YBR023C, YLR353W, YAL041W, YPR055W, YLL021W, YAR014C, YKR100C, YCR038C, YOL112W, YBL061C, YBR102C

## Sheet: (ii) Process
	(ii) 0.1< alpha_phi < 0.2 : GO process
GOID	TERM	CORRECTED_PVALUE	UNCORRECTED_PVALUE	NUM_LIST_ANNOTATIONS	LIST_SIZE	TOTAL_NUM_ANNOTATIONS	POPULATION_SIZE	FDR_RATE	EXPECTED_FALSE_POSITIVES	ANNOTATED_GENES
GO:0019752	carboxylic acid metabolic process	3.81137759903997e-08	2.12096694437394e-11	181	1805	390	5841	0.00%	0	YOL097C, YMR083W, YFR044C, YLR060W, YMR272C, YBR249C, YGL196W, YCL064C, YLL027W, YLR303W, YHR068W, YDR294C, YPL111W, YDR300C, YHR025W, YBL076C, YBL015W, YBR176W, YGR208W, YDL131W, YER069W, YPR167C, YDL168W, YAL044C, YOR303W, YOR130C, YPR060C, YBR166C, YDR380W, YBR041W, YLR134W, YPL038W, YDR428C, YJR109C, YMR217W, YJR070C, YKL001C, YIR034C, YLR380W, YCL030C, YML042W, YOR136W, YPL262W, YBL039C, YOR…
GO:0043436	oxoacid metabolic process	3.81137759903997e-08	2.12096694437394e-11	181	1805	390	5841	0.00%	0	YOL097C, YMR083W, YFR044C, YLR060W, YMR272C, YBR249C, YGL196W, YCL064C, YLL027W, YLR303W, YHR068W, YDR294C, YPL111W, YDR300C, YHR025W, YBL076C, YBL015W, YBR176W, YGR208W, YDL131W, YER069W, YPR167C, YDL168W, YAL044C, YOR303W, YOR130C, YPR060C, YBR166C, YDR380W, YBR041W, YLR134W, YPL038W, YDR428C, YJR109C, YMR217W, YJR070C, YKL001C, YIR034C, YLR380W, YCL030C, YML042W, YOR136W, YPL262W, YBL039C, YOR…
GO:0006082	organic acid metabolic process	5.00539512712503e-08	2.78541743301337e-11	181	1805	391	5841	0.00%	0	YOL097C, YMR083W, YFR044C, YLR060W, YMR272C, YBR249C, YGL196W, YCL064C, YLL027W, YLR303W, YHR068W, YDR294C, YPL111W, YDR300C, YHR025W, YBL076C, YBL015W, YBR176W, YGR208W, YDL131W, YER069W, YPR167C, YDL168W, YAL044C, YOR303W, YOR130C, YPR060C, YBR166C, YDR380W, YBR041W, YLR134W, YPL038W, YDR428C, YJR109C, YMR217W, YJR070C, YKL001C, YIR034C, YLR380W, YCL030C, YML042W, YOR136W, YPL262W, YBL039C, YOR…
GO:0002181	cytoplasmic translation	8.04400382414308e-08	4.47635159941184e-11	83	1805	146	5841	0.00%	0	YER102W, YOL120C, YBR079C, YDR152W, YMR146C, YBL087C, YDL082W, YKL056C, YDR418W, YPR163C, YER117W, YCL037C, YGL031C, YLR167W, YBL076C, YGL068W, YML063W, YBR048W, YIL069C, YMR142C, YDL083C, YNL209W, YML024W, YPL090C, YHR203C, YDR447C, YBL072C, YPL220W, YAL036C, YLR192C, YGR148C, YGR173W, YLR448W, YKL006W, YOR312C, YGL103W, YEL054C, YNL096C, YNL069C, YDR064W, YDR429C, YLL018C, YJL177W, YIL148W, YHL…
GO:0006364	rRNA processing	2.94687533246719e-07	1.63988610599176e-10	118	1805	234	5841	0.00%	0	YHR197W, YDL014W, YER102W, YMR290C, YDR339C, YNL222W, YGL029W, YGR195W, YDR087C, YLR167W, YKL021C, YPR143W, YJL010C, YOR078W, YML063W, YOL080C, YBR048W, YFL002C, YOR056C, YIL069C, YDL213C, YDL083C, YDR083W, YNL209W, YKR060W, YER126C, YPL093W, YAL025C, YHR088W, YPL090C, YLL008W, YCR035C, YAL033W, YEL026W, YHR089C, YNL002C, YBL072C, YDR021W, YLR196W, YPR132W, YER006W, YLR192C, YOR294W, YGL078C, YER…
GO:0006520	cellular amino acid metabolic process	3.12065847252147e-07	1.73659347385725e-10	138	1805	285	5841	0.00%	0	YOL097C, YMR083W, YFR044C, YLR060W, YBR249C, YGL196W, YCL064C, YLR303W, YHR068W, YPL111W, YDR300C, YHR025W, YBL076C, YBR176W, YGR208W, YDL131W, YER069W, YPR167C, YDL168W, YAL044C, YOR303W, YOR130C, YPR060C, YBR166C, YDR380W, YLR134W, YPL038W, YDR428C, YJR109C, YMR217W, YJR070C, YKL001C, YIR034C, YCL030C, YML042W, YOR136W, YBL039C, YDR023W, YPL273W, YLR098C, YGR264C, YLL062C, YKL104C, YDL182W, YJR…
GO:0044271	cellular nitrogen compound biosynthetic process	1.30934093015127e-06	7.28626004536042e-10	145	1805	308	5841	0.00%	0	YBR249C, YLL027W, YLR303W, YHR068W, YDR300C, YDL004W, YMR120C, YHR025W, YDR047W, YBR176W, YNL141W, YGR208W, YDL131W, YER069W, YPR167C, YJR025C, YDR377W, YOR303W, YOR130C, YPR060C, YBR166C, YER070W, YLR245C, YDR428C, YJR109C, YMR217W, YJR070C, YER141W, YKL001C, YIR034C, YCL030C, YNL220W, YOR136W, YBL039C, YGL037C, YPL273W, YJR105W, YLL062C, YGR180C, YDL182W, YML056C, YJR139C, YNL104C, YLL058W, YOR…
GO:0042254	ribosome biogenesis	1.71608482444974e-06	9.54972078157895e-10	153	1805	330	5841	0.00%	0	YCR072C, YHR197W, YDL014W, YER102W, YMR290C, YDR339C, YNL222W, YGL029W, YDR418W, YIR012W, YLR167W, YNR053C, YJL010C, YML063W, YOL080C, YBR048W, YFL002C, YIL069C, YLR009W, YDL213C, YNL209W, YAL025C, YML024W, YHR089C, YBL072C, YLR196W, YER006W, YLR192C, YGL078C, YDR101C, YGR128C, YNL096C, YEL054C, YDR478W, YDR064W, YOL077C, YNL282W, YOR310C, YIL148W, YMR239C, YPR016C, YNR024W, YLR441C, YGR095C, YHR…
GO:0044106	cellular amine metabolic process	3.48361604701216e-06	1.93857320367956e-09	141	1805	301	5841	0.00%	0	YOL097C, YMR083W, YFR044C, YLR060W, YBR249C, YGL196W, YCL064C, YLR303W, YHR068W, YPL111W, YDR300C, YHR025W, YBL076C, YBR176W, YGR208W, YDL131W, YER069W, YPR167C, YDL168W, YAL044C, YOR303W, YOR130C, YPR060C, YBR166C, YDR380W, YLR134W, YPL038W, YDR428C, YJR109C, YMR217W, YJR070C, YKL001C, YIR034C, YCL030C, YML042W, YMR079W, YOR136W, YBL039C, YDR023W, YPL273W, YLR098C, YGR264C, YLL062C, YKL104C, YDL…
GO:0042180	cellular ketone metabolic process	3.57262690194997e-06	1.98810623369503e-09	184	1805	416	5841	0.00%	0	YOL097C, YMR083W, YFR044C, YLR060W, YMR272C, YBR249C, YGL196W, YCL064C, YLL027W, YLR303W, YHR068W, YDR294C, YPL111W, YDR300C, YHR025W, YBL076C, YBL015W, YBR176W, YGR208W, YDL131W, YER069W, YPR167C, YDL168W, YAL044C, YOR303W, YOR130C, YPR060C, YBR166C, YDR380W, YBR041W, YLR134W, YPL038W, YDR428C, YJR109C, YMR217W, YJR070C, YKL001C, YIR034C, YLR380W, YCL030C, YML042W, YOR136W, YPL262W, YBL039C, YOR…
GO:0016072	rRNA metabolic process	1.42113067808779e-05	7.90835101885247e-09	118	1805	246	5841	0.00%	0	YHR197W, YDL014W, YER102W, YMR290C, YDR339C, YNL222W, YGL029W, YGR195W, YDR087C, YLR167W, YKL021C, YPR143W, YJL010C, YOR078W, YML063W, YOL080C, YBR048W, YFL002C, YOR056C, YIL069C, YDL213C, YDL083C, YDR083W, YNL209W, YKR060W, YER126C, YPL093W, YAL025C, YHR088W, YPL090C, YLL008W, YCR035C, YAL033W, YEL026W, YHR089C, YNL002C, YBL072C, YDR021W, YLR196W, YPR132W, YER006W, YLR192C, YOR294W, YGL078C, YER…
GO:0016053	organic acid biosynthetic process	1.96498101249865e-05	1.09347858235874e-08	98	1805	196	5841	0.00%	0	YPR145W, YLR056W, YAL062W, YMR272C, YBR248C, YBR249C, YBR159W, YNL045W, YLL027W, YJL060W, YLR303W, YGL055W, YHR068W, YGR124W, YDR300C, YNL037C, YJR010W, YHR025W, YKL211C, YNR050C, YBR176W, YGR208W, YDL131W, YMR170C, YOR374W, YER069W, YPR167C, YOR303W, YOL064C, YOR130C, YPR060C, YER090W, YLR304C, YJR060W, YPR067W, YOR184W, YDR035W, YIR017C, YBR166C, YLR017W, YBR177C, YJR109C, YJR070C, YOL140W, YFL…
GO:0046394	carboxylic acid biosynthetic process	1.96498101249865e-05	1.09347858235874e-08	98	1805	196	5841	0.00%	0	YPR145W, YLR056W, YAL062W, YMR272C, YBR248C, YBR249C, YBR159W, YNL045W, YLL027W, YJL060W, YLR303W, YGL055W, YHR068W, YGR124W, YDR300C, YNL037C, YJR010W, YHR025W, YKL211C, YNR050C, YBR176W, YGR208W, YDL131W, YMR170C, YOR374W, YER069W, YPR167C, YOR303W, YOL064C, YOR130C, YPR060C, YER090W, YLR304C, YJR060W, YPR067W, YOR184W, YDR035W, YIR017C, YBR166C, YLR017W, YBR177C, YJR109C, YJR070C, YOL140W, YFL…
GO:0055114	oxidation-reduction process	2.05022230920084e-05	1.14091391719579e-08	183	1805	421	5841	0.00%	0	YFL057C, YMR083W, YDR099W, YHR007C, YHR008C, YGL160W, YBR052C, YHR051W, YMR272C, YML080W, YBL021C, YMR081C, YHR104W, YGL018C, YOL071W, YJL200C, YER069W, YHL021C, YPR167C, YBR243C, YDL168W, YJR025C, YMR152W, YMR002W, YGL185C, YMR030W, YGL001C, YBR166C, YLR134W, YER070W, YMR226C, YJR070C, YHR190W, YER141W, YIR034C, YCL030C, YEL047C, YOR136W, YDR031W, YKR066C, YDR402C, YPL262W, YBR149W, YOL059W, YGR…
GO:0008652	cellular amino acid biosynthetic process	3.62833218431789e-05	2.01910527786193e-08	80	1805	153	5841	0.00%	0	YPR145W, YAL062W, YBR248C, YBR249C, YJL060W, YLR303W, YHR068W, YGR124W, YDR300C, YNL037C, YJR010W, YHR025W, YKL211C, YNR050C, YBR176W, YGR208W, YDL131W, YMR170C, YER069W, YPR167C, YOR303W, YOL064C, YOR130C, YPR060C, YER090W, YLR304C, YJR060W, YOR184W, YDR035W, YIR017C, YBR166C, YLR017W, YJR109C, YJR070C, YOL140W, YFL018C, YKL001C, YIR034C, YJR148W, YCL030C, YOR136W, YDL066W, YBR263W, YCR005C, YPL…
GO:0006412	translation	4.7912957933081e-05	2.66627478759493e-08	171	1805	392	5841	0.00%	0	YOL097C, YER102W, YBR079C, YOR187W, YPL215W, YBL087C, YLR060W, YDL092W, YDL082W, YKL056C, YDR418W, YKR006C, YFR009W, YER117W, YCL037C, YGL031C, YLR167W, YDR337W, YBL076C, YOL027C, YHR038W, YML063W, YBR048W, YBR282W, YPR129W, YIL069C, YMR142C, YNL209W, YOR204W, YAL025C, YML024W, YGR076C, YBL072C, YAL036C, YLR192C, YGR173W, YPR080W, YDR023W, YOR312C, YGL103W, YNL096C, YEL054C, YNL069C, YDR064W, YDR…
GO:0044281	small molecule metabolic process	6.07747235685281e-05	3.38201021527702e-08	380	1805	993	5841	0.00%	0	YOL097C, YMR202W, YMR083W, YHR007C, YOR187W, YFR044C, YNL204C, YFR009W, YOL093W, YLR303W, YHR068W, YHR104W, YDR294C, YPL111W, YDL004W, YMR120C, YHR025W, YBL076C, YLR418C, YBL015W, YDL029W, YBR176W, YGR208W, YDL131W, YDR058C, YOR303W, YBL024W, YBR166C, YDR380W, YLR134W, YER070W, YLR245C, YPL038W, YMR205C, YJR070C, YKL001C, YIR034C, YMR079W, YPL262W, YBR160W, YGL037C, YOR040W, YDR023W, YPL273W, YOL…
GO:0009309	amine biosynthetic process	6.48527351475026e-05	3.60894463814706e-08	81	1805	157	5841	0.00%	0	YPR145W, YAL062W, YBR248C, YBR249C, YJL060W, YLR303W, YHR068W, YGR124W, YDR300C, YNL037C, YJR010W, YHR025W, YKL211C, YNR050C, YBR176W, YGR208W, YDL131W, YMR170C, YER069W, YPR167C, YOR303W, YOL064C, YOR130C, YPR060C, YER090W, YLR304C, YJR060W, YOR184W, YDR035W, YIR017C, YBR166C, YLR017W, YJR109C, YJR070C, YOL140W, YFL018C, YLR133W, YKL001C, YIR034C, YJR148W, YCL030C, YOR136W, YDL066W, YBR263W, YCR…
GO:0009308	amine metabolic process	0.000235923	1.3128728249579e-07	146	1805	331	5841	0.00%	0	YOL097C, YMR083W, YDR099W, YFR044C, YGR189C, YLR060W, YBR249C, YGL196W, YCL064C, YLR303W, YHR068W, YPL111W, YDR300C, YHR025W, YBL076C, YBR176W, YGR208W, YDL131W, YER069W, YPR167C, YDL168W, YAL044C, YOR303W, YOR130C, YPR060C, YBR166C, YDR380W, YLR134W, YPL038W, YDR428C, YJR109C, YMR217W, YJR070C, YKL001C, YIR034C, YCL030C, YML042W, YMR079W, YOR136W, YBL039C, YDR023W, YPL273W, YLR098C, YGR264C, YLL…
GO:0044283	small molecule biosynthetic process	0.000293831	1.63511857226589e-07	139	1805	313	5841	0.00%	0	YMR202W, YMR083W, YDL103C, YHR007C, YMR272C, YBR249C, YLL027W, YLR303W, YHR068W, YDR300C, YHR025W, YBR176W, YGR208W, YDL131W, YER069W, YPR167C, YDL168W, YOR303W, YOR130C, YPR060C, YGL001C, YBR166C, YDR380W, YLR134W, YJR109C, YJR070C, YHR190W, YKL001C, YIR034C, YCL030C, YOR136W, YLR372W, YPL273W, YPR172W, YLL062C, YPL148C, YDL182W, YBR026C, YDL055C, YJR139C, YNL104C, YLL058W, YPL117C, YOR375C, YIL…
GO:0042255	ribosome assembly	0.000432083	2.40446711462332e-07	36	1805	56	5841	0.00%	0	YCR072C, YHR197W, YEL054C, YNR054C, YOL077C, YDR418W, YIR012W, YPR016C, YLR167W, YKL021C, YGL099W, YKL009W, YLR075W, YGR214W, YOL080C, YBR048W, YFL002C, YDR025W, YML024W, YLL008W, YHR088W, YDR447C, YGR159C, YPR041W, YGL078C, YLR448W, YHR085W, YML073C, YOL127W, YKR081C, YIR026C, YOR206W, YPL211W, YJL191W, YCR031C, YHR066W
GO:0009084	glutamine family amino acid biosynthetic process	0.000467449	2.6012740990072e-07	22	1805	28	5841	0.00%	0	YOR303W, YOR130C, YLR304C, YAL062W, YLR017W, YNR001C, YJR109C, YJL088W, YER023W, YOL140W, YHR018C, YDR300C, YNL037C, YOL058W, YOR136W, YDL066W, YOR375C, YCR005C, YHR037W, YOR323C, YER069W, YMR062C
GO:0022613	ribonucleoprotein complex biogenesis	0.000750808	4.17811809194691e-07	163	1805	383	5841	0.00%	0	YCR072C, YHR197W, YDL014W, YER102W, YNL016W, YMR290C, YDR339C, YNL222W, YGL029W, YDR418W, YIR012W, YLR167W, YNR053C, YLR418C, YJL010C, YML063W, YOL080C, YBR048W, YFL002C, YPR129W, YIL069C, YLR009W, YDL213C, YDL087C, YNL209W, YAL025C, YML024W, YHR089C, YBL072C, YLR196W, YER006W, YLR192C, YGL078C, YDR101C, YGR128C, YNL096C, YEL054C, YDR478W, YDR064W, YKL095W, YDL160C, YOL077C, YNL282W, YOR310C, YIL…
GO:0009100	glycoprotein metabolic process	0.00108282	6.02570561767023e-07	43	1805	73	5841	0.00%	0	YGL225W, YBR205W, YML115C, YER001W, YHR181W, YDL093W, YGL065C, YEL002C, YDR483W, YDL095W, YDL055C, YMR149W, YJR131W, YDR307W, YPR183W, YDL193W, YPL050C, YBR243C, YJR075W, YGL022W, YNR030W, YBR070C, YGL038C, YBL006C, YJL184W, YOR099W, YJR143C, YBR015C, YGR227W, YOR067C, YAL023C, YGL027C, YEL042W, YER003C, YBR110W, YBL020W, YOR103C, YBR199W, YNL219C, YEL036C, YJL186W, YNL048W, YPL053C
GO:0009101	glycoprotein biosynthetic process	0.00108282	6.02570561767023e-07	43	1805	73	5841	0.00%	0	YGL225W, YBR205W, YML115C, YER001W, YHR181W, YDL093W, YGL065C, YEL002C, YDR483W, YDL095W, YDL055C, YMR149W, YJR131W, YDR307W, YPR183W, YDL193W, YPL050C, YBR243C, YJR075W, YGL022W, YNR030W, YBR070C, YGL038C, YBL006C, YJL184W, YOR099W, YJR143C, YBR015C, YGR227W, YOR067C, YAL023C, YGL027C, YEL042W, YER003C, YBR110W, YBL020W, YOR103C, YBR199W, YNL219C, YEL036C, YJL186W, YNL048W, YPL053C
GO:0000462	maturation of SSU-rRNA from tricistronic rRNA transcript (SSU-rRNA, 5.8S rRNA, LSU-rRNA)	0.0016066	8.9404679471749e-07	50	1805	90	5841	0.00%	0	YER102W, YJR002W, YDR064W, YDR339C, YNR054C, YBR247C, YOR310C, YLR441C, YMR093W, YLR186W, YGR103W, YJL010C, YGR214W, YOR078W, YML063W, YBR048W, YFR001W, YOR056C, YIL069C, YGR118W, YBR181C, YHR065C, YDR025W, YDL083C, YML026C, YOL010W, YDL153C, YPL090C, YDR450W, YEL026W, YBL072C, YOR287C, YDR021W, YPR132W, YLR192C, YOR294W, YPR144C, YNL207W, YKL099C, YOR119C, YMR143W, YGR251W, YER074W, YDL166C, YIL…
GO:0042274	ribosomal small subunit biogenesis	0.00201558	1.12163666287147e-06	61	1805	117	5841	0.00%	0	YNL096C, YER102W, YJR002W, YDR064W, YDR339C, YPL239W, YNR054C, YBR247C, YOR310C, YLR167W, YLR441C, YMR093W, YLR186W, YGR103W, YJL010C, YGR214W, YOR078W, YML063W, YBR048W, YFR001W, YOR056C, YIL069C, YOR096W, YGR118W, YBR181C, YDL213C, YHR065C, YDR025W, YDL083C, YML026C, YKR060W, YOL010W, YML024W, YPL090C, YDL153C, YDR450W, YEL026W, YGR159C, YDR447C, YOR006C, YBL072C, YOR287C, YDR021W, YPR132W, YLR…
GO:0071843	cellular component biogenesis at cellular level	0.00210768	1.17289061238974e-06	197	1805	484	5841	0.00%	0	YCR072C, YHR197W, YDL014W, YDR099W, YER102W, YNL016W, YMR290C, YDR339C, YPL130W, YNL222W, YPL027W, YGL029W, YDR418W, YIR012W, YDR483W, YLR167W, YNR053C, YLR418C, YDL029W, YJL010C, YDR273W, YML063W, YOL080C, YBR048W, YFL002C, YPR129W, YIL069C, YLR009W, YDL213C, YDL087C, YNL209W, YAL025C, YML024W, YHR089C, YBL072C, YLR196W, YGR229C, YER006W, YLR192C, YGL078C, YDR402C, YDR101C, YBR148W, YGR128C, YKL…
GO:0030490	maturation of SSU-rRNA	0.00421244	2.344154096011e-06	52	1805	97	5841	0.00%	0	YER102W, YJR002W, YDR064W, YDR339C, YNR054C, YBR247C, YOR310C, YLR167W, YLR441C, YMR093W, YLR186W, YGR103W, YJL010C, YGR214W, YOR078W, YML063W, YBR048W, YFR001W, YOR056C, YIL069C, YGR118W, YBR181C, YHR065C, YDR025W, YDL083C, YML026C, YOL010W, YDL153C, YPL090C, YDR450W, YEL026W, YOR006C, YBL072C, YOR287C, YDR021W, YPR132W, YLR192C, YOR294W, YPR144C, YNL207W, YKL099C, YOR119C, YMR143W, YGR251W, YER…
GO:0006486	protein glycosylation	0.00471363	2.62305587429106e-06	40	1805	69	5841	0.00%	0	YGL225W, YBR205W, YML115C, YER001W, YHR181W, YDL093W, YGL065C, YEL002C, YDR483W, YDL095W, YDL055C, YMR149W, YJR131W, YDR307W, YPR183W, YDL193W, YPL050C, YBR243C, YGL022W, YNR030W, YBR070C, YGL038C, YOR099W, YJR143C, YBR015C, YGR227W, YOR067C, YAL023C, YGL027C, YEL042W, YER003C, YBR110W, YBL020W, YOR103C, YNL219C, YBR199W, YEL036C, YJL186W, YNL048W, YPL053C
GO:0043413	macromolecule glycosylation	0.00471363	2.62305587429106e-06	40	1805	69	5841	0.00%	0	YGL225W, YBR205W, YML115C, YER001W, YHR181W, YDL093W, YGL065C, YEL002C, YDR483W, YDL095W, YDL055C, YMR149W, YJR131W, YDR307W, YPR183W, YDL193W, YPL050C, YBR243C, YGL022W, YNR030W, YBR070C, YGL038C, YOR099W, YJR143C, YBR015C, YGR227W, YOR067C, YAL023C, YGL027C, YEL042W, YER003C, YBR110W, YBL020W, YOR103C, YNL219C, YBR199W, YEL036C, YJL186W, YNL048W, YPL053C
GO:0070085	glycosylation	0.00775051	4.31302554608041e-06	40	1805	70	5841	0.00%	0	YGL225W, YBR205W, YML115C, YER001W, YHR181W, YDL093W, YGL065C, YEL002C, YDR483W, YDL095W, YDL055C, YMR149W, YJR131W, YDR307W, YPR183W, YDL193W, YPL050C, YBR243C, YGL022W, YNR030W, YBR070C, YGL038C, YOR099W, YJR143C, YBR015C, YGR227W, YOR067C, YAL023C, YGL027C, YEL042W, YER003C, YBR110W, YBL020W, YOR103C, YNL219C, YBR199W, YEL036C, YJL186W, YNL048W, YPL053C
GO:0034660	ncRNA metabolic process	0.0095383	5.30790380839821e-06	160	1805	388	5841	0.00%	0	YOL097C, YHR197W, YDL014W, YER102W, YMR290C, YDR339C, YNL222W, YGL029W, YLR060W, YOL093W, YML080W, YLR167W, YBL076C, YJL010C, YML063W, YOL080C, YBR048W, YFL002C, YIL069C, YDL213C, YNL209W, YAL025C, YBL024W, YDL047W, YHR089C, YBL072C, YLR196W, YER006W, YLR192C, YGL078C, YDR023W, YGR128C, YNL096C, YDR478W, YDR064W, YGR264C, YNR046W, YNL282W, YOR310C, YMR239C, YPR016C, YNR024W, YLR441C, YGR095C, YBR…

## Sheet: (ii) Function
	(ii) 0.1< alpha_phi < 0.2 : GO function
GOID	TERM	CORRECTED_PVALUE	UNCORRECTED_PVALUE	NUM_LIST_ANNOTATIONS	LIST_SIZE	TOTAL_NUM_ANNOTATIONS	POPULATION_SIZE	FDR_RATE	EXPECTED_FALSE_POSITIVES	ANNOTATED_GENES
GO:0016491	oxidoreductase activity	4.3245279788479e-06	6.44490011750805e-09	145	1805	316	5841	0.00%	0	YFL057C, YMR083W, YHR007C, YHR008C, YGL160W, YBR052C, YHR051W, YMR272C, YML080W, YHR104W, YOL071W, YDR518W, YER069W, YHL021C, YPR167C, YDL168W, YJR025C, YMR152W, YAL044C, YGL185C, YGL001C, YBR166C, YER070W, YMR226C, YJR070C, YHR190W, YER141W, YIR034C, YCL030C, YEL047C, YOR136W, YKR066C, YDR402C, YBR149W, YOL059W, YEL071W, YPR172W, YGL157W, YML131W, YGR180C, YMR318C, YCL035C, YBR026C, YML056C, YBL…
GO:0003723	RNA binding	6.50614528677766e-06	9.69619267776104e-09	184	1805	423	5841	0.00%	0	YOR179C, YJR093C, YDL014W, YNL016W, YMR290C, YBR079C, YOR187W, YDL084W, YNL222W, YLR060W, YDL092W, YCL037C, YHR104W, YGL031C, YDR300C, YDR337W, YHR038W, YOR362C, YJL010C, YFR023W, YFL002C, YGL044C, YPR129W, YDL213C, YDL087C, YOR204W, YBL024W, YMR205C, YHR089C, YER029C, YER006W, YOR159C, YLR192C, YGL078C, YIR034C, YPR080W, YOR136W, YGR128C, YGL103W, YNL069C, YNL175C, YDR478W, YDR064W, YDR429C, YDL…
GO:0005525	GTP binding	0.00248622	3.70524935455941e-06	54	1805	103	5841	0.00%	0	YNL093W, YOR089C, YPL218W, YMR138W, YFL038C, YPL051W, YOR187W, YML085C, YJR072C, YDL225W, YPR165W, YCR002C, YGR152C, YOR142W, YDL055C, YKL154W, YKR001C, YLL001W, YNR053C, YGL099W, YDR172W, YKR014C, YOR101W, YGL130W, YHR107C, YML001W, YPL093W, YBR164C, YOR094W, YGL210W, YML124C, YAL035W, YER006W, YDL137W, YPR041W, YAL036C, YFL005W, YER025W, YGR173W, YPR080W, YFL037W, YNL220W, YOR133W, YDL192W, YLR…
GO:0019001	guanyl nucleotide binding	0.00248622	3.70524935455941e-06	54	1805	103	5841	0.00%	0	YNL093W, YOR089C, YPL218W, YMR138W, YFL038C, YPL051W, YOR187W, YML085C, YJR072C, YDL225W, YPR165W, YCR002C, YGR152C, YOR142W, YDL055C, YKL154W, YKR001C, YLL001W, YNR053C, YGL099W, YDR172W, YKR014C, YOR101W, YGL130W, YHR107C, YML001W, YPL093W, YBR164C, YOR094W, YGL210W, YML124C, YAL035W, YER006W, YDL137W, YPR041W, YAL036C, YFL005W, YER025W, YGR173W, YPR080W, YFL037W, YNL220W, YOR133W, YDL192W, YLR…
GO:0032561	guanyl ribonucleotide binding	0.00248622	3.70524935455941e-06	54	1805	103	5841	0.00%	0	YNL093W, YOR089C, YPL218W, YMR138W, YFL038C, YPL051W, YOR187W, YML085C, YJR072C, YDL225W, YPR165W, YCR002C, YGR152C, YOR142W, YDL055C, YKL154W, YKR001C, YLL001W, YNR053C, YGL099W, YDR172W, YKR014C, YOR101W, YGL130W, YHR107C, YML001W, YPL093W, YBR164C, YOR094W, YGL210W, YML124C, YAL035W, YER006W, YDL137W, YPR041W, YAL036C, YFL005W, YER025W, YGR173W, YPR080W, YFL037W, YNL220W, YOR133W, YDL192W, YLR…
GO:0003924	GTPase activity	0.00289404	4.31302554608041e-06	40	1805	70	5841	0.00%	0	YNL093W, YOR089C, YPL218W, YFL038C, YPL051W, YOR187W, YML085C, YJR072C, YPR165W, YCR002C, YGR152C, YKL154W, YKR001C, YLL001W, YNR053C, YGL099W, YDR172W, YKR014C, YOR101W, YHR107C, YML001W, YBR164C, YOR094W, YGL210W, YML124C, YAL035W, YER006W, YDL137W, YFL005W, YER025W, YPR080W, YFL037W, YOR133W, YDL192W, YDR385W, YOR185C, YHR005C, YBR118W, YBR264C, YIL118W

## Sheet: (ii) Component
	(ii) 0.1< alpha_phi < 0.2 : GO component
GOID	TERM	CORRECTED_PVALUE	UNCORRECTED_PVALUE	NUM_LIST_ANNOTATIONS	LIST_SIZE	TOTAL_NUM_ANNOTATIONS	POPULATION_SIZE	FDR_RATE	EXPECTED_FALSE_POSITIVES	ANNOTATED_GENES
GO:0044445	cytosolic part	3.20194400256753e-12	6.99114411040946e-15	117	1805	207	5841	0.00%	0	YBL041W, YER102W, YOL120C, YER012W, YBL087C, YML092C, YDL082W, YDR418W, YGR253C, YIR012W, YFR009W, YER117W, YGL031C, YLR167W, YOL111C, YJL111W, YOR362C, YFR050C, YMR116C, YLL026W, YJL008C, YFR052W, YML063W, YBR048W, YOR157C, YIL069C, YMR142C, YOR007C, YDL083C, YHR174W, YML024W, YLR421C, YPL090C, YMR205C, YHR203C, YDR447C, YBL072C, YMR323W, YAL035W, YPL220W, YPR132W, YPR041W, YDR427W, YGR148C, YLR…
GO:0005829	cytosol	7.21150886451732e-11	1.57456525426142e-13	189	1805	394	5841	0.00%	0	YOR357C, YER102W, YOR387C, YBL087C, YML092C, YDL082W, YKL056C, YDR418W, YGR253C, YIR012W, YFR009W, YER117W, YGL031C, YPL111W, YLR167W, YDL126C, YNR035C, YMR120C, YDL065C, YBL076C, YOL111C, YBL015W, YDL135C, YJL111W, YNL141W, YOR362C, YFR050C, YJL008C, YFR052W, YML063W, YBR048W, YIL069C, YMR142C, YML024W, YLR421C, YMR205C, YBL072C, YDR427W, YLR380W, YEL047C, YMR079W, YPL262W, YBR149W, YDR101C, YBL…
GO:0030529	ribonucleoprotein complex	9.46628180182082e-10	2.06687375585607e-12	260	1805	594	5841	0.00%	0	YCR072C, YER102W, YMR290C, YDR339C, YBR079C, YGL160W, YDL084W, YFR044C, YGL029W, YBL087C, YDL092W, YIR012W, YFR009W, YLR167W, YNR053C, YOL111C, YJL010C, YML063W, YBR048W, YFL002C, YLR009W, YMR142C, YDL213C, YDL087C, YAL025C, YML024W, YGR076C, YHR089C, YBL072C, YER006W, YOR159C, YEL047C, YDR101C, YBR160W, YGR128C, YOR312C, YGL103W, YNL096C, YLR270W, YGR078C, YDR064W, YOR310C, YIL148W, YJL177W, YGL…
GO:0030684	preribosome	5.30420677040603e-08	1.15812374899695e-10	80	1805	141	5841	0.00%	0	YDL014W, YER102W, YMR290C, YDR339C, YGL029W, YDR087C, YPR143W, YNR053C, YJL010C, YOR078W, YML063W, YBR048W, YFL002C, YOR056C, YLR009W, YDL213C, YKR060W, YER126C, YPL093W, YAL025C, YHR088W, YPL090C, YLL008W, YEL026W, YHR203C, YNL002C, YBL072C, YER006W, YOR294W, YKR081C, YNL075W, YGR251W, YIR026C, YGR128C, YNL096C, YNL175C, YJR002W, YDR064W, YOR061W, YNR054C, YOL077C, YBR247C, YOR310C, YPR016C, YLR…
GO:0005737	cytoplasm	5.83260625639806e-07	1.27349481580744e-09	1203	1805	3561	5841	0.00%	0	YOR357C, YOR187W, YDR201W, YHR051W, YIR012W, YHR068W, YOL071W, YJR055W, YDL126C, YPL139C, YDL127W, YLR415C, YJL111W, YCR060W, YFR052W, YML063W, YNL036W, YDR540C, YLR009W, YMR142C, YOR303W, YHR192W, YML024W, YDR380W, YGL210W, YKL001C, YIR034C, YDR510W, YEL047C, YMR079W, YOR286W, YDR031W, YKR066C, YLR408C, YGL037C, YCL040W, YGR207C, YNR021W, YGL103W, YDR384C, YNL096C, YJR067C, YNR046W, YDR328C, YMR…
GO:0022626	cytosolic ribosome	1.46425335840958e-06	3.19705973451872e-09	79	1805	146	5841	0.00%	0	YER102W, YOL120C, YBL087C, YDL082W, YDR418W, YIR012W, YFR009W, YER117W, YGL031C, YLR167W, YMR116C, YML063W, YBR048W, YIL069C, YMR142C, YDL083C, YML024W, YPL090C, YHR203C, YDR447C, YBL072C, YPL220W, YAL035W, YPR132W, YPR041W, YGR148C, YLR448W, YDR101C, YKL006W, YOR312C, YGL103W, YEL054C, YNL096C, YNL069C, YDR064W, YHR013C, YLR244C, YJL177W, YIL148W, YHL001W, YLR441C, YNL301C, YIL018W, YNL007C, YLR…
GO:0042175	nuclear outer membrane-endoplasmic reticulum membrane network	6.31103127509937e-06	1.37795442687759e-08	151	1805	335	5841	0.00%	0	YMR202W, YFL038C, YPL087W, YML092C, YMR272C, YGL065C, YGL020C, YGR253C, YJR015W, YDL095W, YDL126C, YCL045C, YKL154W, YDL065C, YGR284C, YMR149W, YJR131W, YDR307W, YOR362C, YFR050C, YER100W, YBR243C, YDR058C, YGL022W, YGL001C, YGL200C, YOL101C, YHR190W, YOR067C, YGL231C, YLR064W, YMR314W, YNL048W, YAL053W, YNR021W, YPR103W, YHL003C, YLL014W, YDL018C, YJR088C, YOR254C, YBR036C, YPR159W, YDR411C, YIL…
GO:0005840	ribosome	2.22805505070273e-05	4.86474901900159e-08	142	1805	316	5841	0.00%	0	YCR072C, YDL014W, YER102W, YPL215W, YGL160W, YFR044C, YBL087C, YDL082W, YKL056C, YDR418W, YKR006C, YIR012W, YFR009W, YER117W, YGL031C, YLR167W, YDR337W, YOL111C, YML063W, YBR048W, YBR282W, YIL069C, YMR142C, YAL025C, YML024W, YMR226C, YGR076C, YBL072C, YAL036C, YPR080W, YEL047C, YDR101C, YBR160W, YHR113W, YOR312C, YGL103W, YNL096C, YEL054C, YNL069C, YDR064W, YIL148W, YJL177W, YDR462W, YHL001W, YNR…
GO:0044444	cytoplasmic part	3.27408748103534e-05	7.14866262234791e-08	873	1805	2525	5841	0.00%	0	YMR202W, YOR357C, YNL079C, YHR007C, YFL038C, YBR079C, YOR187W, YDR201W, YFR044C, YHR051W, YBL087C, YDL092W, YGL020C, YGR253C, YIR012W, YOL071W, YDR294C, YLR167W, YDL126C, YKL154W, YMR120C, YKL063C, YOL111C, YLR415C, YJL111W, YBR176W, YDR518W, YNL115C, YFR052W, YML063W, YDR058C, YNL249C, YMR142C, YOR303W, YHL040C, YML024W, YGL210W, YGR076C, YDR510W, YEL047C, YMR079W, YOR286W, YDR031W, YKR066C, YEL…
GO:0005789	endoplasmic reticulum membrane	6.19409019523013e-05	1.35242144000658e-07	143	1805	323	5841	0.00%	0	YMR202W, YFL038C, YPL087W, YMR272C, YGL065C, YGL020C, YJR015W, YDL095W, YDL126C, YCL045C, YKL154W, YDL065C, YGR284C, YMR149W, YJR131W, YDR307W, YFR050C, YER100W, YBR243C, YDR058C, YGL022W, YGL001C, YGL200C, YOL101C, YHR190W, YOR067C, YGL231C, YLR064W, YNL048W, YAL053W, YNR021W, YPR103W, YHL003C, YLL014W, YDL018C, YJR088C, YOR254C, YBR036C, YPR159W, YDR411C, YIL039W, YLR378C, YNR030W, YDR434W, YBR…
GO:0005730	nucleolus	0.000102226	2.2320065718807e-07	121	1805	266	5841	0.00%	0	YCR072C, YDR174W, YDL014W, YMR290C, YDR339C, YGL029W, YGR195W, YNL248C, YDR087C, YIR015W, YKL021C, YPR143W, YNR053C, YML074C, YJL010C, YER035W, YOR078W, YOL080C, YBR154C, YFL002C, YOR056C, YIL069C, YLR009W, YDL213C, YDR083W, YJL148W, YKR060W, YER126C, YPL093W, YAL025C, YDL051W, YKR092C, YBL024W, YHR088W, YLL008W, YAL033W, YCR035C, YEL026W, YHR089C, YNL002C, YLR196W, YDR021W, YER006W, YOR294W, YGL…
GO:0044432	endoplasmic reticulum part	0.000174948	3.81982569233428e-07	149	1805	344	5841	0.00%	0	YMR202W, YFL038C, YPL087W, YMR272C, YGL065C, YGL020C, YJR015W, YDL095W, YDR294C, YDL126C, YCL045C, YKL154W, YDL065C, YGR284C, YMR149W, YJR131W, YDR307W, YFR050C, YDR518W, YER100W, YBR243C, YDR058C, YGL022W, YGL001C, YGL200C, YOL101C, YHR190W, YOR067C, YGL231C, YLR064W, YDR304C, YNL048W, YAL053W, YNR021W, YPR103W, YHL003C, YLL014W, YDL018C, YJR088C, YOR254C, YJL034W, YBR036C, YPR159W, YDR411C, YIL…
GO:0022627	cytosolic small ribosomal subunit	0.000210672	4.59982616229047e-07	36	1805	57	5841	0.00%	0	YNL096C, YER102W, YDR064W, YLR167W, YLR441C, YNL007C, YGR214W, YMR116C, YML063W, YOR369C, YBR048W, YIL069C, YOR096W, YGR118W, YER131W, YBR181C, YDR025W, YML026C, YDL083C, YLR333C, YML024W, YPL090C, YDR450W, YDR447C, YHR203C, YBL072C, YJR123W, YAL035W, YPR132W, YPR041W, YGL189C, YMR143W, YER074W, YJL191W, YCR031C, YGR054W
GO:0005783	endoplasmic reticulum	0.000292143	6.37867454284873e-07	183	1805	441	5841	0.00%	0	YMR202W, YHR007C, YFL038C, YPL087W, YMR272C, YGL065C, YGL020C, YJR015W, YDL095W, YDR294C, YDL126C, YMR183C, YCL045C, YKL154W, YDL065C, YGR284C, YMR149W, YJR131W, YKR014C, YDR307W, YFR050C, YDR518W, YER100W, YBR243C, YDR058C, YGL022W, YGL001C, YGL200C, YBR041W, YOL101C, YHR190W, YOR067C, YGL231C, YLR064W, YBR160W, YDR304C, YLR372W, YNL048W, YAL053W, YNR021W, YNL044W, YPR103W, YHL003C, YLL014W, YMR…
GO:0001950	plasma membrane enriched fraction	0.000907584	1.98162432968357e-06	45	1805	80	5841	0.00%	0	YMR186W, YOR317W, YDR099W, YGR292W, YLR432W, YCR004C, YPR165W, YGR254W, YLR303W, YJR065C, YBR078W, YMR183C, YMR120C, YCR010C, YDL135C, YDR212W, YCR012W, YHR096C, YGR086C, YDR033W, YER177W, YDL124W, YNL209W, YHR174W, YMR215W, YBR299W, YDR158W, YGL008C, YFL005W, YNL231C, YGR256W, YKL035W, YMR008C, YCR021C, YLL024C, YEL047C, YDR343C, YPL004C, YDR522C, YIR038C, YCL040W, YPL036W, YJL171C, YIL118W, YDR…
GO:0030687	preribosome, large subunit precursor	0.00140244	3.06208741901184e-06	30	1805	47	5841	0.00%	0	YLR009W, YER002W, YMR290C, YER126C, YPL093W, YAL025C, YHR088W, YLL008W, YGL029W, YOL077C, YNL002C, YDR087C, YKL172W, YPR016C, YER006W, YOR294W, YPR143W, YNR053C, YHR052W, YOR272W, YKR081C, YKL009W, YNL110C, YGR103W, YIR026C, YOR206W, YPL211W, YFR001W, YAL059W, YNL061W
GO:0044391	ribosomal subunit	0.00167846	3.66475837567813e-06	92	1805	200	5841	0.00%	0	YER102W, YOL120C, YDR175C, YBL087C, YCR003W, YDL082W, YDR418W, YKR006C, YBR251W, YER117W, YGL031C, YLR167W, YDR337W, YMR116C, YML063W, YBR048W, YBR282W, YIL069C, YMR142C, YDL083C, YKR060W, YML024W, YPL090C, YGR076C, YHR203C, YDR447C, YBL072C, YPL220W, YAL035W, YPR132W, YPR041W, YGR148C, YLR448W, YDR101C, YKL006W, YML025C, YBL038W, YOR312C, YGL103W, YEL054C, YNL096C, YNL069C, YDR064W, YPL173W, YBR…
GO:0030686	90S preribosome	0.00976562	2.13223217469778e-05	46	1805	88	5841	0.00%	0	YNL096C, YDL014W, YER102W, YJR002W, YMR290C, YDR064W, YOR061W, YNR054C, YBR247C, YOR310C, YLR441C, YOR272W, YMR093W, YPR137W, YLR186W, YGR103W, YJL010C, YGR214W, YOR078W, YML063W, YPL266W, YBR048W, YFL002C, YOR096W, YDR025W, YDL213C, YKR060W, YOL010W, YPL090C, YHR148W, YHR203C, YJR123W, YBL072C, YOR287C, YDR299W, YPR144C, YLR197W, YMR143W, YNL075W, YGR251W, YOR206W, YLR175W, YGR128C, YCR031C, YCL…

## Sheet: (iii) Process
	(iii) 0.2< alpha_phi < 0.3 : GO process
GOID	TERM	CORRECTED_PVALUE	UNCORRECTED_PVALUE	NUM_LIST_ANNOTATIONS	LIST_SIZE	TOTAL_NUM_ANNOTATIONS	POPULATION_SIZE	FDR_RATE	EXPECTED_FALSE_POSITIVES	ANNOTATED_GENES
GO:XXXXXXX	unannotated	9.71692359819826e-47	1.43954423677011e-49	140	435	504	5841	0.00%	0	YNL303W, YDL050C, YLR184W, YOL046C, YDL158C, YGR160W, YLR294C, YFL032W, YJL120W, YOR146W, YNL285W, YGL239C, YDL026W, YPL114W, YEL074W, YHL045W, YGL109W, YPR136C, YKL044W, YBR051W, YBR174C, YDR203W, YIL025C, YGR051C, YKL097C, YGL074C, YOL037C, YDR024W, YNR005C, YNL198C, YGR164W, YDR544C, YGL041C, YDL016C, YGR115C, YPR197C, YOR379C, YNL028W, YOR248W, YGL034C, YGR293C, YLL047W, YOL166C, YOR015W, YFL…
GO:0002181	cytoplasmic translation	2.65915457685758e-12	3.93948826201122e-15	42	435	146	5841	0.00%	0	YDL136W, YLL045C, YLR061W, YJL190C, YOR234C, YNL178W, YLR029C, YGL147C, YMR194W, YOL039W, YPL198W, YGR027C, YHL033C, YKR057W, YPL131W, YDL191W, YLR048W, YPL081W, YDR500C, YLR367W, YLR340W, YFR049W, YBR031W, YLR185W, YJR145C, YPR102C, YDL081C, YDR012W, YGL030W, YHR141C, YOR293W, YGL076C, YPL143W, YOR063W, YPR043W, YMR230W, YDL075W, YKL156W, YDR382W, YLR344W, YGR085C, YHR021C
GO:0006412	translation	0.000272406	4.03564179137368e-07	57	435	392	5841	0.00%	0	YDL136W, YLL045C, YLR061W, YJL190C, YHL034C, YOR234C, YNL178W, YLR150W, YLR029C, YGL147C, YMR194W, YOL039W, YPL198W, YGR027C, YHL033C, YKR057W, YPL013C, YPL131W, YDL191W, YLR048W, YPL081W, YDR500C, YML028W, YBL090W, YGR285C, YKR059W, YLR367W, YLR340W, YFR049W, YBR031W, YGL123W, YNL122C, YLR185W, YJR145C, YBR120C, YJL138C, YPR102C, YDL081C, YGL030W, YDR012W, YHR141C, YOR293W, YGR215W, YGL076C, YPL…
GO:0046165	alcohol biosynthetic process	0.00384074	5.68998462287185e-06	20	435	89	5841	0.00%	0	YLR377C, YER062C, YMR015C, YJL167W, YGR192C, YJL052W, YML126C, YKL150W, YKL152C, YOL086C, YKL060C, YGR060W, YBR145W, YBR196C, YDR050C, YDR511W, YMR303C, YER044C, YJR009C, YFL045C
GO:0006007	glucose catabolic process	0.00686769	1.01743601220224e-05	14	435	50	5841	0.00%	0	YBR145W, YDR050C, YBR196C, YHR183W, YGR192C, YJL052W, YJR009C, YAL038W, YGL253W, YKL152C, YLR354C, YOL086C, YDL085W, YKL060C

## Sheet: (iii) Function
	(iii) 0.2< alpha_phi < 0.3 : GO function
GOID	TERM	CORRECTED_PVALUE	UNCORRECTED_PVALUE	NUM_LIST_ANNOTATIONS	LIST_SIZE	TOTAL_NUM_ANNOTATIONS	POPULATION_SIZE	FDR_RATE	EXPECTED_FALSE_POSITIVES	ANNOTATED_GENES
GO:XXXXXXX	unannotated	2.5767841838185e-47	1.43954423677011e-49	140	435	504	5841	0.00%	0	YNL303W, YDL050C, YLR184W, YOL046C, YDL158C, YGR160W, YLR294C, YFL032W, YJL120W, YOR146W, YNL285W, YGL239C, YDL026W, YPL114W, YEL074W, YHL045W, YGL109W, YPR136C, YKL044W, YBR051W, YBR174C, YDR203W, YIL025C, YGR051C, YKL097C, YGL074C, YOL037C, YDR024W, YNR005C, YNL198C, YGR164W, YDR544C, YGL041C, YDL016C, YGR115C, YPR197C, YOR379C, YNL028W, YOR248W, YGL034C, YGR293C, YLL047W, YOL166C, YOR015W, YFL…
GO:0003735	structural constituent of ribosome	1.85960550458864e-12	1.03888575675343e-14	48	435	190	5841	0.00%	0	YDL136W, YLL045C, YLR061W, YJL190C, YOR234C, YNL178W, YLR029C, YGL147C, YMR194W, YOL039W, YPL198W, YGR027C, YHL033C, YKR057W, YPL013C, YPL131W, YDL191W, YLR048W, YPL081W, YDR500C, YBL090W, YLR367W, YLR340W, YFR049W, YBR031W, YGL123W, YNL122C, YLR185W, YJR145C, YPR102C, YDL081C, YDR012W, YGL030W, YHR141C, YOR293W, YGR215W, YGL076C, YPL143W, YBR189W, YOR063W, YMR230W, YPR043W, YDL075W, YKL156W, YDR…
GO:0005198	structural molecule activity	4.39568140017545e-07	2.45568793305891e-09	55	435	323	5841	0.00%	0	YKR083C, YDL136W, YLL045C, YLR061W, YJL190C, YOR234C, YNL178W, YLR029C, YGL147C, YER011W, YOR010C, YMR194W, YOL039W, YPL198W, YGR027C, YHL033C, YKR057W, YPL013C, YPL131W, YDL191W, YLR048W, YPL081W, YDR500C, YBL090W, YDR086C, YLR367W, YLR340W, YKL164C, YFR049W, YBR031W, YGL123W, YKL042W, YNL122C, YLR185W, YJR145C, YPR102C, YDL081C, YGL030W, YDR012W, YHR141C, YOR293W, YGR215W, YGL076C, YPL143W, YKL…

## Sheet: (iii) Component
	(iii) 0.2< alpha_phi < 0.3 : GO component
GOID	TERM	CORRECTED_PVALUE	UNCORRECTED_PVALUE	NUM_LIST_ANNOTATIONS	LIST_SIZE	TOTAL_NUM_ANNOTATIONS	POPULATION_SIZE	FDR_RATE	EXPECTED_FALSE_POSITIVES	ANNOTATED_GENES
GO:XXXXXXX	unannotated	3.13820643615885e-47	1.43954423677011e-49	140	435	504	5841	0.00%	0	YNL303W, YDL050C, YLR184W, YOL046C, YDL158C, YGR160W, YLR294C, YFL032W, YJL120W, YOR146W, YNL285W, YGL239C, YDL026W, YPL114W, YEL074W, YHL045W, YGL109W, YPR136C, YKL044W, YBR051W, YBR174C, YDR203W, YIL025C, YGR051C, YKL097C, YGL074C, YOL037C, YDR024W, YNR005C, YNL198C, YGR164W, YDR544C, YGL041C, YDL016C, YGR115C, YPR197C, YOR379C, YNL028W, YOR248W, YGL034C, YGR293C, YLL047W, YOL166C, YOR015W, YFL…
GO:0022626	cytosolic ribosome	4.35615167461016e-15	1.99823471312393e-17	45	435	146	5841	0.00%	0	YDL136W, YLL045C, YLR061W, YJL190C, YOR234C, YNL178W, YLR150W, YLR029C, YGL147C, YMR194W, YOL039W, YPL198W, YGR027C, YHL033C, YKR057W, YPL131W, YDL191W, YLR048W, YPL081W, YDR500C, YLR367W, YLR340W, YBR031W, YGL123W, YLR185W, YJR145C, YPR102C, YDL081C, YDR012W, YGL030W, YHR141C, YOR293W, YGL076C, YPL143W, YBR189W, YOR063W, YJR047C, YPR043W, YMR230W, YDL075W, YKL156W, YDR382W, YGR085C, YLR344W, YHR…
GO:0022625	cytosolic large ribosomal subunit	2.33672732317643e-12	1.07189326751212e-14	29	435	74	5841	0.00%	0	YLR185W, YDL136W, YLL045C, YLR061W, YOR234C, YLR029C, YGL147C, YPR102C, YMR194W, YOL039W, YPL198W, YDL081C, YGL030W, YDR012W, YHL033C, YHR141C, YGL076C, YPL143W, YPL131W, YDL191W, YDR500C, YOR063W, YPR043W, YLR340W, YDL075W, YBR031W, YDR382W, YGR085C, YLR344W
GO:0044391	ribosomal subunit	8.14810254931339e-11	3.73766171986853e-13	47	435	200	5841	0.00%	0	YDL136W, YLL045C, YLR061W, YJL190C, YOR234C, YNL178W, YLR029C, YGL147C, YMR194W, YOL039W, YPL198W, YGR027C, YHL033C, YKR057W, YPL013C, YPL131W, YDL191W, YLR048W, YPL081W, YDR500C, YBL090W, YLR367W, YLR340W, YFR049W, YBR031W, YGL123W, YLR185W, YJR145C, YPR102C, YDL081C, YDR012W, YGL030W, YHR141C, YOR293W, YGR215W, YGL076C, YPL143W, YBR189W, YOR063W, YMR230W, YPR043W, YDL075W, YKL156W, YDR382W, YGR…
GO:0005840	ribosome	2.69300489485075e-09	1.23532334626181e-11	59	435	316	5841	0.00%	0	YDL136W, YLL045C, YLR061W, YJL190C, YOR234C, YNL178W, YLR150W, YLR029C, YGL147C, YMR194W, YOL039W, YPL198W, YJL213W, YGR027C, YHL033C, YKR057W, YPL013C, YPL131W, YDL191W, YLR048W, YPL081W, YDR500C, YBL090W, YGR285C, YKR059W, YLR367W, YLR340W, YMR114C, YFR049W, YBR031W, YGL123W, YBL028C, YNL122C, YLR185W, YJR145C, YBR120C, YJL138C, YPR102C, YDL081C, YLR327C, YGL030W, YDR012W, YHR141C, YOR293W, YGR…
GO:0044445	cytosolic part	4.81380316846933e-09	2.20816659104098e-11	45	435	207	5841	0.00%	0	YDL136W, YLL045C, YLR061W, YJL190C, YOR234C, YNL178W, YLR150W, YLR029C, YGL147C, YMR194W, YOL039W, YPL198W, YGR027C, YHL033C, YKR057W, YPL131W, YDL191W, YLR048W, YPL081W, YDR500C, YLR367W, YLR340W, YBR031W, YGL123W, YLR185W, YJR145C, YPR102C, YDL081C, YDR012W, YGL030W, YHR141C, YOR293W, YGL076C, YPL143W, YBR189W, YOR063W, YJR047C, YPR043W, YMR230W, YDL075W, YKL156W, YDR382W, YGR085C, YLR344W, YHR…
GO:0005829	cytosol	7.84363543316704e-09	3.59799790512249e-11	67	435	394	5841	0.00%	0	YDL136W, YLL045C, YLR061W, YOR234C, YGL211W, YMR194W, YOL039W, YPL198W, YLR438W, YBR011C, YGR027C, YHL033C, YKR057W, YPL131W, YLR048W, YDR500C, YGR209C, YML028W, YLL009C, YDR044W, YGL123W, YLR185W, YDL081C, YGL030W, YPL143W, YBR189W, YJR047C, YMR230W, YGR206W, YKL156W, YHR053C, YGR085C, YLR344W, YHR021C, YLR377C, YDR226W, YJL190C, YLR150W, YNL178W, YGL147C, YLR029C, YAL038W, YKL152C, YOL086C, YKL…
GO:0015934	large ribosomal subunit	4.59428159261216e-07	2.10746862046429e-09	29	435	114	5841	0.00%	0	YLR185W, YDL136W, YLL045C, YLR061W, YOR234C, YLR029C, YGL147C, YPR102C, YMR194W, YOL039W, YPL198W, YDL081C, YGL030W, YDR012W, YHL033C, YHR141C, YGL076C, YPL143W, YPL131W, YDL191W, YDR500C, YOR063W, YPR043W, YLR340W, YDL075W, YBR031W, YDR382W, YGR085C, YLR344W
GO:0030529	ribonucleoprotein complex	0.00518196	2.37704792080471e-05	71	435	594	5841	0.00%	0	YDL136W, YLL045C, YLR061W, YHL034C, YOR234C, YMR194W, YOL039W, YPL198W, YJL213W, YGR027C, YHL033C, YKR057W, YPL013C, YPL131W, YBL026W, YLR048W, YDR500C, YML028W, YBL090W, YMR114C, YFR049W, YGL123W, YBL028C, YNL122C, YLR185W, YBR120C, YBL018C, YBR167C, YDL081C, YGL030W, YGR215W, YNL286W, YPL143W, YPL225W, YBR189W, YJR047C, YMR230W, YKL156W, YLR344W, YGR085C, YHR021C, YDL208W, YJL190C, YLR150W, YBR…

## Sheet: (iv) Process
	(iv) alpha_phi > 0.3 : GO process
GOID	TERM	CORRECTED_PVALUE	UNCORRECTED_PVALUE	NUM_LIST_ANNOTATIONS	LIST_SIZE	TOTAL_NUM_ANNOTATIONS	POPULATION_SIZE	FDR_RATE	EXPECTED_FALSE_POSITIVES	ANNOTATED_GENES
GO:XXXXXXX	unannotated	2.02747265493395e-73	5.13284216438976e-76	143	306	504	5841	0.00%	0	YOR169C, YLR302C, YIR020C, YOL118C, YOL050C, YLL020C, YAR075W, YPR130C, YIR040C, YJR087W, YOR170W, YOR135C, YCL023C, YOR041C, YDR187C, YIL028W, YDR521W, YJR071W, YGR291C, YDR271C, YGR228W, YGL024W, YJL135W, YLR322W, YBR144C, YJL015C, YGR265W, YMR326C, YLR202C, YLR101C, YGR025W, YOR072W, YLR282C, YJL022W, YKR012C, YOL150C, YLR255C, YJR023C, YMR007W, YAL069W, YNL057W, YEL014C, YLR232W, YKL036C, YDL…

[truncated: 2 more sheets: (iv) Function, (iv) Component]
