# Supplementary material for: Ribosome Traffic on mRNAs Maps to Gene Ontology: Genome-wide Quantification of Translation Initiation Rates and Polysome Size Regulation
Source: PLoS Comput Biol. 2013 Jan 31;9(1):e1002866. doi: 10.1371/journal.pcbi.1002866 (PMC3561044; doi:10.1371/journal.pcbi.1002866)
Supplement: Table S5 — GO annotations of genes belonging to the top and bottom quartile of the distribution. Each sheet is named according to their (top quartile = 25% of genes having the largest , bottom quartile = 25% of genes having the smallest ), and with the GO aspect (process, function, component). (XLS) [file pcbi.1002866.s005.xls]

## Sheet: top P
In this table we report the output files from a Gene Ontology Term Finder ( http://go.princeton.edu/cgi-bin/GOTermFinder ) developed at the Lewis-Sigler Institute at Princeton.							Legend:
Each sheet is named according to their Jmax (top quartile = last quartile, with the largest Jmax, bottom quartile = with the smallest Jmax), and with the GO aspect (process, function, component).							CORRECTED_PVALUE: p-value corrected after Bonferroni correction			TOTAL_NUM_ANNOTATIONS: # genes in the background population with this annotation
							NUM_LIST_ANNOTATIONS: # genes in the set with this annotation			POPULATION_SIZE: # genes in the background population
	top quartile – GO process						LIST_SIZE: # genes in the set			FDR_RATE: false discovery rate
GOID	TERM	CORRECTED_PVALUE	UNCORRECTED_PVALUE	NUM_LIST_ANNOTATIONS	LIST_SIZE	TOTAL_NUM_ANNOTATIONS	POPULATION_SIZE	FDR_RATE	EXPECTED_FALSE_POSITIVES	ANNOTATED_GENES
GO:0002181	cytoplasmic translation	1.22696199796526e-71	7.46781496022676e-75	151	1573	166	6289	0.00%	0	YLR325C, YDL136W, YER102W, YBR079C, YOR234C, YBL087C, YKL056C, YDR418W, YDL082W, YBL092W, YER117W, YGR027C, YKR057W, YGL031C, YPL131W, YLR167W, YBL076C, YLR388W, YML063W, YBR048W, YIL069C, YMR142C, YLR185W, YNL209W, YJL136C, YML024W, YDL081C, YBL072C, YPL143W, YAL036C, YDL184C, YLR192C, YDL130W, YBR084C-A, YMR230W, YLR344W, YBR191W, YHR021C, YOR312C, YGL103W, YNL096C, YEL054C, YOL121C, YNL069C, Y…
GO:0006412	translation	2.55611727696634e-43	1.5557621892674e-46	240	1573	426	6289	0.00%	0	YLR325C, YOL097C, YDL136W, YER102W, YHL034C, YBR079C, YOR234C, YBL087C, YDL092W, YKL056C, YDR418W, YDL082W, YBL092W, YFR009W, YDR140W, YER117W, YGR027C, YKR057W, YGL031C, YPL131W, YPL013C, YLR167W, YOR158W, YBL076C, YLR388W, YML028W, YML129C, YML063W, YGL123W, YBR048W, YPR129W, YBR282W, YIL069C, YMR012W, YNL122C, YMR142C, YLR185W, YBR120C, YNL209W, YOR204W, YJL136C, YAL025C, YML024W, YDL081C, YGR…
GO:0044271	cellular nitrogen compound biosynthetic process	2.40520955329548e-17	1.46391330084935e-20	152	1573	312	6289	0.00%	0	YBL098W, YBR249C, YJR133W, YLL027W, YLR303W, YHR068W, YGR286C, YDR300C, YFL060C, YDL004W, YMR120C, YCL018W, YHR025W, YGR208W, YNL141W, YDL131W, YDR502C, YJR025C, YDR377W, YOL055C, YOR303W, YPR060C, YPL271W, YER070W, YLR245C, YMR217W, YJR070C, YLR146C, YKL001C, YIR034C, YJR047C, YNL220W, YOR136W, YBL039C, YGL037C, YML106W, YNL191W, YJR105W, YGR180C, YDL182W, YML056C, YJR139C, YNL104C, YGR061C, YOR…
GO:0042254	ribosome biogenesis	6.70844704688002e-17	4.08304750266587e-20	163	1573	346	6289	0.00%	0	YJL050W, YCR072C, YDL136W, YDL014W, YER102W, YDR339C, YNL222W, YGL029W, YDR418W, YKR057W, YPL131W, YBL026W, YLR167W, YDR060W, YJL010C, YML063W, YGL123W, YOL080C, YIL115C, YBR048W, YIL069C, YLR009W, YDL213C, YKL186C, YNL209W, YDL060W, YJL136C, YAL025C, YML024W, YLR435W, YHR089C, YBL072C, YLR196W, YLR192C, YGL078C, YBR189W, YDR101C, YMR230W, YHR170W, YHR021C, YEL054C, YDL208W, YNL096C, YOL121C, YLR…
GO:0044283	small molecule biosynthetic process	4.88872384887665e-13	2.97548621355852e-16	145	1573	319	6289	0.00%	0	YMR202W, YMR083W, YHR007C, YJL052W, YMR272C, YBR249C, YLL027W, YLR303W, YHR068W, YGR286C, YDR300C, YFL060C, YCL018W, YHR025W, YOR125C, YGR208W, YDL131W, YJR009C, YDR502C, YDL168W, YOL055C, YOR303W, YPR060C, YLR134W, YJR070C, YLR146C, YKL001C, YIR034C, YJR047C, YOR136W, YLR372W, YPR172W, YMR015C, YGL062W, YNR016C, YPL148C, YKL152C, YDL182W, YIL053W, YOL086C, YDL055C, YJR139C, YNL104C, YPL061W, YPL…
GO:0044281	small molecule metabolic process	1.14360993350855e-12	6.96049868234055e-16	356	1573	1007	6289	0.00%	0	YNL111C, YOL097C, YMR202W, YMR083W, YHR007C, YJL052W, YFR044C, YOR153W, YBL098W, YFR009W, YDR140W, YLR303W, YHR068W, YHR104W, YDR294C, YPL111W, YFL060C, YDL004W, YMR120C, YCL018W, YBL076C, YHR025W, YLR418C, YDL029W, YGR208W, YDL131W, YJR009C, YDR196C, YDR058C, YOR303W, YER070W, YLR134W, YLR245C, YMR205C, YLR201C, YJR070C, YKL001C, YHR112C, YIR034C, YMR079W, YBR160W, YGL037C, YDR023W, YMR015C, YGR…
GO:0022613	ribonucleoprotein complex biogenesis	1.711639530277e-12	1.04177695086853e-15	171	1573	401	6289	0.00%	0	YJL050W, YCR072C, YDL136W, YDL014W, YER102W, YDR339C, YNL222W, YGL029W, YDR418W, YKR057W, YPL131W, YBL026W, YLR167W, YEL015W, YLR418C, YDR060W, YJL010C, YML063W, YGL123W, YOL080C, YIL115C, YBR048W, YPR129W, YIL069C, YLR009W, YDL213C, YKL186C, YNL209W, YDL060W, YJL136C, YAL025C, YML024W, YLR435W, YHR089C, YBL072C, YLR196W, YLR192C, YGL078C, YBR189W, YDR101C, YMR230W, YHR170W, YHR021C, YOR276W, YEL…
GO:0006414	translational elongation	7.03840928529066e-11	4.28387661916656e-14	39	1573	52	6289	0.00%	0	YER102W, YLR150W, YAL003W, YDL092W, YOL039W, YFR009W, YKR057W, YGR285C, YLR340W, YPL048W, YGL123W, YEL034W, YGL043W, YIL069C, YGR118W, YNL209W, YJL136C, YML024W, YLR406C, YHR064C, YKL081W, YDL081C, YDR447C, YBL072C, YJR123W, YPR132W, YER025W, YDL130W, YPR080W, YDL229W, YBR189W, YJR047C, YOR133W, YLR249W, YDR385W, YER074W, YBR118W, YDL075W, YDR382W
GO:0044249	cellular biosynthetic process	7.73845485559572e-11	4.70995426390488e-14	591	1573	1886	6289	0.00%	0	YOL097C, YMR202W, YHR007C, YBR079C, YBL087C, YBL098W, YDL092W, YDR140W, YHR068W, YPL131W, YOL071W, YLR167W, YMR120C, YLR418C, YML028W, YJR009C, YML063W, YDR196C, YNL122C, YMR012W, YMR142C, YOR303W, YBR120C, YOR204W, YJL136C, YML024W, YGR076C, YKL001C, YIR034C, YGL037C, YDR023W, YER148W, YOR312C, YGL103W, YJL115W, YNL096C, YMR015C, YDR064W, YKL104C, YDR190C, YHL001W, YPL021W, YGR061C, YLR340W, YLR…
GO:0009058	biosynthetic process	9.86844388604821e-11	6.00635659528193e-14	599	1573	1918	6289	0.00%	0	YNL111C, YOL097C, YMR202W, YHR007C, YBR079C, YBL087C, YBL098W, YDL092W, YDR140W, YHR068W, YPL131W, YOL071W, YLR167W, YMR120C, YLR418C, YML028W, YJR009C, YML063W, YDR196C, YNL122C, YMR012W, YMR142C, YOR303W, YBR120C, YOR204W, YJL136C, YML024W, YGR076C, YKL001C, YIR034C, YGL037C, YDR023W, YER148W, YOR312C, YGL103W, YJL115W, YNL096C, YMR015C, YDR064W, YKL104C, YDR190C, YHL001W, YPL021W, YGR061C, YLR…
GO:0044237	cellular metabolic process	9.9618700775779e-10	6.06321976724157e-13	995	1573	3494	6289	0.00%	0	YNL111C, YOL097C, YMR202W, YHR007C, YBR079C, YFL038C, YHR051W, YFR044C, YBL087C, YBL098W, YDL092W, YIL008W, YDR140W, YBR011C, YHR068W, YPL131W, YDR294C, YOL071W, YLR167W, YDL126C, YLR204W, YMR120C, YEL015W, YLR418C, YML028W, YJL111W, YDR518W, YJR009C, YML063W, YOL080C, YHR001W-A, YDR196C, YDR058C, YDR540C, YNL122C, YMR012W, YMR142C, YOR303W, YKL212W, YBR120C, YOR204W, YJL136C, YML024W, YGR076C, Y…
GO:0034654	nucleobase-containing compound biosynthetic process	1.43951713039172e-09	8.76151631400928e-13	64	1573	114	6289	0.00%	0	YLR359W, YDR020C, YDR226W, YKL067W, YNL191W, YDR399W, YBL099W, YJR105W, YBL098W, YGR180C, YLR432W, YJR133W, YML022W, YKL024C, YML056C, YHR216W, YDL004W, YMR120C, YGR061C, YGR209C, YOR209C, YLR043C, YNL141W, YBR039W, YAR015W, YOR101W, YLR295C, YJL026W, YLR328W, YDR502C, YJR025C, YDR377W, YJR121W, YGL234W, YKL181W, YPL078C, YKL016C, YFR047C, YPL271W, YHR144C, YER070W, YLR231C, YLR245C, YHL011C, YDR…
GO:0006520	cellular amino acid metabolic process	1.56671937565225e-09	9.53572352801128e-13	126	1573	288	6289	0.00%	0	YPR145W, YOL097C, YMR083W, YAL062W, YFR044C, YBR249C, YPL160W, YLR438W, YDR036C, YCL064C, YLR303W, YHR068W, YDR037W, YGR124W, YDR300C, YPL111W, YFL060C, YNL037C, YHR020W, YCL018W, YBL076C, YJR010W, YHR025W, YNR050C, YMR243C, YKL029C, YGR208W, YDL131W, YIL116W, YDL215C, YDR502C, YDL168W, YOR303W, YOL064C, YAL044C, YKR039W, YPR060C, YLR304C, YJR060W, YLR134W, YMR217W, YDR321W, YJR070C, YOL140W, YFL…
GO:0055114	oxidation-reduction process	2.57729435772034e-09	1.56865146544148e-12	171	1573	429	6289	0.00%	0	YNL111C, YJL050W, YMR083W, YHR007C, YDR099W, YJL052W, YDL246C, YBR052C, YHR051W, YBL098W, YMR272C, YML080W, YIR035C, YBL069W, YHR104W, YGL039W, YOL071W, YIL125W, YCL018W, YML028W, YOR125C, YJR009C, YDL215C, YDR256C, YHR001W-A, YDL168W, YMR152W, YJR025C, YER070W, YLR134W, YBR244W, YHR176W, YLR201C, YJL166W, YJR070C, YIR034C, YJR048W, YEL047C, YOR136W, YDR031W, YBR149W, YKR066C, YGR207C, YLR460C, Y…
GO:0008152	metabolic process	2.5883999459714e-09	1.57541080095642e-12	1039	1573	3684	6289	0.00%	0	YHR051W, YIL008W, YDR140W, YBR011C, YIR035C, YHR068W, YOL071W, YDL126C, YLR204W, YEL015W, YML028W, YJL111W, YJR009C, YML063W, YHR001W-A, YDR540C, YNL122C, YMR012W, YMR142C, YOR303W, YBR120C, YML024W, YBR244W, YKL001C, YIR034C, YDR510W, YDR430C, YEL047C, YMR079W, YDR031W, YKR066C, YGL037C, YMR059W, YER148W, YGR207C, YGL103W, YNL096C, YGL183C, YLR059C, YJR045C, YPR131C, YKL104C, YDR190C, YMR305C, Y…
GO:0006364	rRNA processing	3.35652073855008e-09	2.04292193460139e-12	110	1573	243	6289	0.00%	0	YOR145C, YJL050W, YDL136W, YDL014W, YER102W, YDR339C, YNL222W, YGL029W, YKR057W, YER112W, YBL026W, YLR167W, YHR087W, YLR048W, YPR143W, YOL041C, YJL010C, YML063W, YGL123W, YOL080C, YBR048W, YIL069C, YDL213C, YDL083C, YDR083W, YNL209W, YDL060W, YJL136C, YER126C, YPL093W, YBL018C, YAL025C, YPL090C, YLR435W, YBR167C, YCR035C, YEL026W, YGL030W, YHR089C, YNL308C, YBL072C, YLR196W, YDR021W, YPR132W, YLR…
GO:0019752	carboxylic acid metabolic process	5.2641072806016e-09	3.20396060900889e-12	159	1573	394	6289	0.00%	0	YOL097C, YMR083W, YFR044C, YMR272C, YBR249C, YDR036C, YCL064C, YLL027W, YLR303W, YHR068W, YDR294C, YGR286C, YDR300C, YPL111W, YFL060C, YIL125W, YCL018W, YBL076C, YHR025W, YMR243C, YGR208W, YDL131W, YDL215C, YDR502C, YDL168W, YOR303W, YAL044C, YPR060C, YLR134W, YMR217W, YDR321W, YJR070C, YLR146C, YKL001C, YHR112C, YIR034C, YJR047C, YOR136W, YBL039C, YLR372W, YLR118C, YDR023W, YOR317W, YNL191W, YGR…
GO:0043436	oxoacid metabolic process	5.2641072806016e-09	3.20396060900889e-12	159	1573	394	6289	0.00%	0	YOL097C, YMR083W, YFR044C, YMR272C, YBR249C, YDR036C, YCL064C, YLL027W, YLR303W, YHR068W, YDR294C, YGR286C, YDR300C, YPL111W, YFL060C, YIL125W, YCL018W, YBL076C, YHR025W, YMR243C, YGR208W, YDL131W, YDL215C, YDR502C, YDL168W, YOR303W, YAL044C, YPR060C, YLR134W, YMR217W, YDR321W, YJR070C, YLR146C, YKL001C, YHR112C, YIR034C, YJR047C, YOR136W, YBL039C, YLR372W, YLR118C, YDR023W, YOR317W, YNL191W, YGR…
GO:0006082	organic acid metabolic process	6.72252399795729e-09	4.09161533655343e-12	159	1573	395	6289	0.00%	0	YOL097C, YMR083W, YFR044C, YMR272C, YBR249C, YDR036C, YCL064C, YLL027W, YLR303W, YHR068W, YDR294C, YGR286C, YDR300C, YPL111W, YFL060C, YIL125W, YCL018W, YBL076C, YHR025W, YMR243C, YGR208W, YDL131W, YDL215C, YDR502C, YDL168W, YOR303W, YAL044C, YPR060C, YLR134W, YMR217W, YDR321W, YJR070C, YLR146C, YKL001C, YHR112C, YIR034C, YJR047C, YOR136W, YBL039C, YLR372W, YLR118C, YDR023W, YOR317W, YNL191W, YGR…
GO:0071843	cellular component biogenesis at cellular level	1.64064205640439e-08	9.98564854780519e-12	192	1573	505	6289	0.00%	0	YJL050W, YCR072C, YDL136W, YDL014W, YER102W, YDR099W, YDR339C, YNL222W, YGL029W, YDR418W, YDR483W, YKR057W, YPL131W, YBL026W, YLR167W, YEL015W, YLR418C, YDL029W, YDR060W, YJL010C, YML063W, YGL123W, YOL080C, YIL115C, YBR048W, YPR129W, YIL069C, YLR009W, YDL213C, YKL186C, YNL209W, YDL060W, YJL136C, YAL025C, YML024W, YLR435W, YHR089C, YBL072C, YLR196W, YLR192C, YGL078C, YKL096W, YBR189W, YDR101C, YMR…
GO:0044267	cellular protein metabolic process	3.5988291247449e-08	2.19040117148198e-11	423	1573	1314	6289	0.00%	0	YLR325C, YOL097C, YBL091C, YER102W, YBR079C, YOR234C, YBL087C, YBR280C, YDL092W, YIL008W, YBL092W, YFR009W, YDR140W, YGR027C, YKL166C, YHR068W, YPL131W, YLR167W, YDL126C, YBL076C, YLR388W, YLR418C, YML028W, YOL133W, YJL111W, YDR518W, YML129C, YML063W, YGL123W, YBR048W, YNL122C, YMR012W, YMR142C, YLR185W, YBR120C, YOR204W, YJL136C, YAL025C, YML024W, YGR076C, YBL072C, YPL143W, YJR070C, YGR215W, YDL…
GO:0042180	cellular ketone metabolic process	5.35164208560819e-08	3.25723803141095e-11	165	1573	423	6289	0.00%	0	YOL097C, YMR083W, YFR044C, YMR272C, YBR249C, YDR036C, YCL064C, YLL027W, YLR303W, YHR068W, YGL039W, YDR294C, YGR286C, YDR300C, YPL111W, YFL060C, YIL125W, YCL018W, YBL076C, YHR025W, YMR243C, YOR125C, YGR208W, YDL131W, YDL215C, YDR502C, YDL168W, YOR303W, YAL044C, YPR060C, YLR134W, YLR201C, YMR217W, YDR321W, YJR070C, YLR146C, YKL001C, YHR112C, YIR034C, YJR047C, YOR136W, YBL039C, YLR372W, YLR118C, YDR…
GO:0019538	protein metabolic process	5.92908611668507e-08	3.60869514101343e-11	440	1573	1380	6289	0.00%	0	YLR325C, YOL097C, YBL091C, YER102W, YBR079C, YOR234C, YFR044C, YBL087C, YBR280C, YDL092W, YIL008W, YBL092W, YFR009W, YDR140W, YGR027C, YKL166C, YHR068W, YPL131W, YLR167W, YDL126C, YBL076C, YLR388W, YLR418C, YML028W, YOL133W, YJL111W, YDR518W, YML129C, YML063W, YGL123W, YBR048W, YNL122C, YMR012W, YMR142C, YLR185W, YBR120C, YOR204W, YJL136C, YAL025C, YML024W, YGR076C, YBL072C, YPL143W, YJR070C, YGR…
GO:0044106	cellular amine metabolic process	6.27030293701841e-08	3.81637427694365e-11	127	1573	304	6289	0.00%	0	YPR145W, YOL097C, YMR083W, YAL062W, YFR044C, YBR249C, YPL160W, YLR438W, YDR036C, YCL064C, YLR303W, YHR068W, YDR037W, YGR124W, YDR300C, YPL111W, YFL060C, YNL037C, YHR020W, YCL018W, YBL076C, YJR010W, YHR025W, YNR050C, YMR243C, YKL029C, YGR208W, YDL131W, YIL116W, YDL215C, YDR502C, YDL168W, YOR303W, YOL064C, YAL044C, YKR039W, YPR060C, YLR304C, YJR060W, YLR134W, YMR217W, YDR321W, YJR070C, YOL140W, YFL…
GO:0009165	nucleotide biosynthetic process	1.29924096663353e-07	7.90773564597399e-11	56	1573	102	6289	0.00%	0	YLR359W, YDR020C, YDR226W, YKL067W, YDR399W, YBL099W, YJR105W, YBL098W, YGR180C, YLR432W, YJR133W, YML022W, YKL024C, YML056C, YHR216W, YDL004W, YMR120C, YGR061C, YGR209C, YOR209C, YLR043C, YNL141W, YBR039W, YAR015W, YOR101W, YLR295C, YJL026W, YLR328W, YJR025C, YDR377W, YJR121W, YGL234W, YKL181W, YPL078C, YFR047C, YKL016C, YHR144C, YPL271W, YER070W, YLR231C, YHL011C, YGL008C, YMR217W, YDL045C, YDR…
GO:0016072	rRNA metabolic process	1.36962885177369e-07	8.33614638937119e-11	110	1573	255	6289	0.00%	0	YOR145C, YJL050W, YDL136W, YDL014W, YER102W, YDR339C, YNL222W, YGL029W, YKR057W, YER112W, YBL026W, YLR167W, YHR087W, YLR048W, YPR143W, YOL041C, YJL010C, YML063W, YGL123W, YOL080C, YBR048W, YIL069C, YDL213C, YDL083C, YDR083W, YNL209W, YDL060W, YJL136C, YER126C, YPL093W, YBL018C, YAL025C, YPL090C, YLR435W, YBR167C, YCR035C, YEL026W, YGL030W, YHR089C, YNL308C, YBL072C, YLR196W, YDR021W, YPR132W, YLR…
GO:0018130	heterocycle biosynthetic process	1.54983837008386e-06	9.43297851542215e-10	80	1573	174	6289	0.00%	0	YBL099W, YBL098W, YJR133W, YLL027W, YGL040C, YGR286C, YDR300C, YHR216W, YFL060C, YDL004W, YMR120C, YIL119C, YNL141W, YIL116W, YDR044W, YGR144W, YFL058W, YDR502C, YJR025C, YDR377W, YFL059W, YOL055C, YGL234W, YPR067W, YFR047C, YPL271W, YGL008C, YMR217W, YDL244W, YDL045C, YLR420W, YNL220W, YBL039C, YGL037C, YML106W, YLR359W, YDR020C, YDR226W, YKL067W, YDR399W, YJR105W, YLR432W, YGL026C, YML022W, YFR…
GO:0042274	ribosomal small subunit biogenesis	1.88205718892278e-06	1.14550041930784e-09	61	1573	121	6289	0.00%	0	YOR145C, YNL096C, YOL121C, YER102W, YDR064W, YDR339C, YNR054C, YKL143W, YOR310C, YKR057W, YLR167W, YLR048W, YLR441C, YPL081W, YHL015W, YNL147W, YJL010C, YGR214W, YML063W, YBR048W, YFR001W, YIL069C, YOR096W, YBR181C, YGR118W, YDR025W, YDL213C, YHR065C, YDL083C, YML026C, YLR409C, YJL136C, YML024W, YPL090C, YDL153C, YLR435W, YGR081C, YDR450W, YEL026W, YNL308C, YOR006C, YDR447C, YGR159C, YBL072C, YDR…
GO:0009308	amine metabolic process	2.77167812279497e-06	1.68696173024648e-09	132	1573	335	6289	0.00%	0	YOL097C, YMR083W, YDR099W, YFR044C, YBR249C, YDR036C, YCL064C, YLR303W, YHR068W, YDR300C, YPL111W, YFL060C, YCL018W, YBL076C, YHR025W, YMR243C, YGR208W, YDL131W, YDL215C, YDR502C, YDL168W, YOR303W, YAL044C, YPR060C, YLR134W, YMR217W, YDR321W, YJR070C, YLR146C, YKL001C, YHR112C, YIR034C, YJR047C, YMR079W, YOR136W, YBL039C, YDR023W, YNL191W, YGR264C, YKL104C, YDL182W, YOL086C, YJR139C, YNL104C, YGR…
GO:0016053	organic acid biosynthetic process	4.68306461562887e-06	2.85031321705957e-09	87	1573	198	6289	0.00%	0	YPR145W, YAL062W, YMR272C, YBR249C, YLL027W, YLR303W, YHR068W, YGL055W, YGR124W, YGR286C, YDR300C, YNL037C, YCL018W, YJR010W, YHR025W, YNR050C, YGR208W, YER061C, YDL131W, YIL116W, YDR502C, YOL064C, YOR303W, YPR060C, YLR304C, YJR060W, YPR067W, YJR070C, YOL140W, YFL018C, YLR146C, YKL001C, YIR034C, YJR148W, YJR047C, YOR136W, YDL066W, YBR263W, YPR035W, YLR372W, YPL231W, YKL182W, YGL009C, YNR016C, YPL…
GO:0046394	carboxylic acid biosynthetic process	4.68306461562887e-06	2.85031321705957e-09	87	1573	198	6289	0.00%	0	YPR145W, YAL062W, YMR272C, YBR249C, YLL027W, YLR303W, YHR068W, YGL055W, YGR124W, YGR286C, YDR300C, YNL037C, YCL018W, YJR010W, YHR025W, YNR050C, YGR208W, YER061C, YDL131W, YIL116W, YDR502C, YOL064C, YOR303W, YPR060C, YLR304C, YJR060W, YPR067W, YJR070C, YOL140W, YFL018C, YLR146C, YKL001C, YIR034C, YJR148W, YJR047C, YOR136W, YDL066W, YBR263W, YPR035W, YLR372W, YPL231W, YKL182W, YGL009C, YNR016C, YPL…
GO:0009260	ribonucleotide biosynthetic process	1.18405973226316e-05	7.20669344043312e-09	34	1573	55	6289	0.00%	0	YLR359W, YDR020C, YDR226W, YKL067W, YDR399W, YBL099W, YJR105W, YLR432W, YJR133W, YML022W, YML056C, YHR216W, YDL004W, YGR061C, YMR120C, YNL141W, YBR039W, YAR015W, YLR295C, YDR377W, YGL234W, YJR121W, YKL181W, YPL078C, YKL016C, YPL271W, YHL011C, YGL008C, YMR217W, YDR298C, YBL039C, YEL021W, YBL068W, YKL216W
GO:0008652	cellular amino acid biosynthetic process	1.68873242144682e-05	1.02783470568888e-08	71	1573	155	6289	0.00%	0	YPR145W, YAL062W, YBR249C, YLR303W, YHR068W, YGR124W, YDR300C, YNL037C, YCL018W, YJR010W, YHR025W, YNR050C, YGR208W, YDL131W, YIL116W, YDR502C, YOL064C, YOR303W, YPR060C, YLR304C, YJR060W, YJR070C, YOL140W, YFL018C, YLR146C, YKL001C, YIR034C, YJR148W, YJR047C, YOR136W, YDL066W, YBR263W, YPR035W, YGL009C, YFR030W, YLR355C, YGL026C, YDL182W, YNR001C, YFR025C, YJR139C, YNL104C, YER086W, YIL094C, YGL…
GO:0042255	ribosome assembly	1.76083409665634e-05	1.07171886588943e-08	35	1573	58	6289	0.00%	0	YCR072C, YEL054C, YNR054C, YOL077C, YDR418W, YPL131W, YPR016C, YLR167W, YLR048W, YDR060W, YKL009W, YLR075W, YLR340W, YGR214W, YOL080C, YBR048W, YDR025W, YML024W, YPR102C, YDR447C, YGR159C, YPR041W, YGL078C, YLR221C, YLR448W, YOR063W, YML073C, YKR081C, YOL127W, YPL211W, YKL156W, YJL191W, YCR031C, YGR085C, YHR021C
GO:0009309	amine biosynthetic process	6.21085189989991e-05	3.78018983560555e-08	71	1573	159	6289	0.00%	0	YPR145W, YAL062W, YBR249C, YLR303W, YHR068W, YGR124W, YDR300C, YNL037C, YCL018W, YJR010W, YHR025W, YNR050C, YGR208W, YDL131W, YIL116W, YDR502C, YOL064C, YOR303W, YPR060C, YLR304C, YJR060W, YJR070C, YOL140W, YFL018C, YLR146C, YKL001C, YIR034C, YJR148W, YJR047C, YOR136W, YDL066W, YBR263W, YPR035W, YGL009C, YFR030W, YLR355C, YGL026C, YDL182W, YNR001C, YFR025C, YJR139C, YNL104C, YER086W, YIL094C, YGL…
GO:0046483	heterocycle metabolic process	7.84018580230698e-05	4.77187206470297e-08	150	1573	410	6289	0.00%	0	YMR083W, YOR153W, YBL098W, YJR133W, YFR009W, YBR127C, YLL027W, YGR286C, YDR300C, YBR111C, YFL060C, YDL004W, YMR120C, YBR092C, YDL029W, YOR163W, YDL135C, YNL141W, YER136W, YDR196C, YDR502C, YDL168W, YJR025C, YDR377W, YOL055C, YPL271W, YLR134W, YLR245C, YMR217W, YGR008C, YPR080W, YNL220W, YBL039C, YGL037C, YOR185C, YML106W, YPR172W, YNL191W, YGL062W, YJR105W, YMR318C, YLR354C, YOL086C, YML056C, YGR…
GO:0030490	maturation of SSU-rRNA	0.000115518	7.0309117237208e-08	49	1573	98	6289	0.00%	0	YOR145C, YER102W, YDR064W, YDR339C, YNR054C, YOR310C, YKR057W, YLR167W, YLR048W, YLR441C, YPL081W, YHL015W, YNL147W, YJL010C, YGR214W, YML063W, YBR048W, YFR001W, YIL069C, YBR181C, YGR118W, YHR065C, YDR025W, YDL083C, YML026C, YJL136C, YPL090C, YDL153C, YLR435W, YGR081C, YDR450W, YEL026W, YNL308C, YOR006C, YBL072C, YDR021W, YPR132W, YLR192C, YBR189W, YOR119C, YER082C, YMR143W, YER074W, YKL156W, YJL…
GO:0044238	primary metabolic process	0.000182571	1.11120327002293e-07	921	1573	3326	6289	0.00%	0	YNL111C, YOL097C, YMR202W, YHR007C, YBR079C, YFR044C, YBL087C, YBL098W, YDL092W, YIL008W, YDR140W, YHR068W, YPL131W, YDR294C, YOL071W, YLR167W, YDL126C, YLR204W, YMR120C, YEL015W, YLR418C, YML028W, YJL111W, YDR518W, YJR009C, YML063W, YOL080C, YDR196C, YDR058C, YDR540C, YNL122C, YMR012W, YMR142C, YOR303W, YKL212W, YBR120C, YOR204W, YJL136C, YML024W, YGR076C, YBL003C, YKL001C, YOR159C, YHR112C, YIR…
GO:0000462	maturation of SSU-rRNA from tricistronic rRNA transcript (SSU-rRNA, 5.8S rRNA, LSU-rRNA)	0.000191054	1.16283853899596e-07	46	1573	91	6289	0.00%	0	YOR145C, YER102W, YDR064W, YDR339C, YNR054C, YOR310C, YKR057W, YLR048W, YLR441C, YPL081W, YHL015W, YJL010C, YGR214W, YML063W, YBR048W, YFR001W, YIL069C, YBR181C, YGR118W, YHR065C, YDR025W, YDL083C, YML026C, YJL136C, YPL090C, YDL153C, YLR435W, YGR081C, YDR450W, YEL026W, YNL308C, YBL072C, YDR021W, YPR132W, YLR192C, YBR189W, YOR119C, YER082C, YMR143W, YER074W, YKL156W, YJL191W, YCR031C, YDR324C, YCL…
GO:0009152	purine ribonucleotide biosynthetic process	0.000269978	1.64320301335193e-07	27	1573	43	6289	0.00%	0	YDR377W, YLR359W, YDR226W, YJR121W, YGL234W, YPL078C, YKL067W, YDR399W, YBL099W, YKL016C, YPL271W, YJR105W, YLR432W, YJR133W, YML022W, YGL008C, YMR217W, YML056C, YDR298C, YHR216W, YDL004W, YGR061C, YMR120C, YNL141W, YBR039W, YAR015W, YLR295C
GO:0009081	branched chain family amino acid metabolic process	0.000607046	3.69474175079851e-07	18	1573	24	6289	0.00%	0	YLR044C, YGL009C, YMR108W, YLR134W, YLR355C, YDR036C, YDR158W, YJR016C, YFL018C, YNL104C, YJR139C, YER086W, YHR025W, YJR148W, YCL018W, YCL009C, YIL051C, YOR108W
GO:0006091	generation of precursor metabolites and energy	0.000849964	5.17324630228321e-07	84	1573	208	6289	0.00%	0	YNL111C, YMR105C, YMR083W, YGR183C, YDR099W, YJL052W, YHR051W, YMR272C, YOR142W, YGL055W, YOL071W, YIL125W, YNL037C, YGR209C, YGL068W, YCR012W, YJR009C, YHR001W-A, YGR244C, YLR164W, YER177W, YHR174W, YGR192C, YLR304C, YLR134W, YMR205C, YLR201C, YML130C, YMR323W, YJL166W, YEL024W, YJR048W, YIR031C, YOR136W, YDL066W, YDR031W, YGR240C, YOR283W, YPR191W, YIL070C, YLR364W, YGR207C, YBL030C, YLR044C, Y…
GO:0034660	ncRNA metabolic process	0.00103342	6.28986376030548e-07	142	1573	398	6289	0.00%	0	YOL097C, YKL149C, YJL050W, YDL136W, YDL014W, YER102W, YDR339C, YNL222W, YGL029W, YIL008W, YML080W, YKR057W, YBL026W, YLR167W, YBL076C, YJL010C, YML063W, YGL123W, YOL080C, YBR048W, YIL069C, YDL213C, YNL209W, YDL060W, YJL136C, YAL025C, YLR435W, YHR089C, YBL072C, YLR196W, YLR192C, YGL078C, YBR189W, YDR023W, YMR059W, YHR021C, YDL208W, YNL096C, YLR059C, YDR064W, YGR264C, YJL035C, YOR310C, YER133W, YNL…
GO:0009082	branched chain family amino acid biosynthetic process	0.00147497	8.97732175037658e-07	13	1573	15	6289	0.00%	0	YJR139C, YNL104C, YER086W, YCL018W, YJR148W, YCL009C, YGL009C, YMR108W, YLR355C, YIL051C, YDR158W, YOR108W, YJR016C
GO:0006448	regulation of translational elongation	0.00184483	1.12284341457857e-06	17	1573	23	6289	0.00%	0	YNL209W, YLR406C, YHR064C, YDL092W, YFR009W, YJR123W, YPR132W, YER025W, YDL229W, YBR189W, YJR047C, YGR285C, YDR385W, YGL123W, YDL075W, YEL034W, YGR118W
GO:0009161	ribonucleoside monophosphate metabolic process	0.00228831	1.3927617581567e-06	21	1573	32	6289	0.00%	0	YLR359W, YDR020C, YGL234W, YKL181W, YDR399W, YJR105W, YLR432W, YHL011C, YJR133W, YML022W, YMR217W, YML056C, YHR216W, YGR061C, YMR120C, YEL021W, YNL141W, YAR015W, YKL216W, YBL068W, YDR454C
GO:0034470	ncRNA processing	0.00255221	1.55338343203188e-06	124	1573	343	6289	0.00%	0	YOR145C, YJL050W, YDL136W, YDL014W, YER102W, YDR339C, YNL222W, YGL029W, YIL008W, YML080W, YKR057W, YDR267C, YER112W, YBL026W, YLR167W, YHR087W, YLR048W, YPR143W, YOL041C, YJL010C, YML063W, YGL123W, YOL080C, YBR048W, YIL069C, YDL213C, YDL083C, YDR083W, YNL209W, YDL060W, YJL136C, YER126C, YPL093W, YBL018C, YDL051W, YAL025C, YPL090C, YLR435W, YBR167C, YCR035C, YEL026W, YGL030W, YHR089C, YGL232W, YNL…
GO:0055086	nucleobase-containing small molecule metabolic process	0.00285743	1.73915167746741e-06	119	1573	327	6289	0.00%	0	YMR083W, YPL218W, YBL099W, YOR153W, YBL098W, YJR133W, YFR009W, YJR069C, YBR127C, YMR315W, YHR216W, YDL004W, YMR120C, YGR209C, YDL029W, YOR163W, YDL135C, YNL141W, YLR208W, YER136W, YCL050C, YDR196C, YDR502C, YJR025C, YDR377W, YJL121C, YGL234W, YKL151C, YKL181W, YFR047C, YPL271W, YER070W, YLR245C, YGL008C, YMR217W, YGR008C, YAL035W, YDL045C, YER122C, YIL066C, YCR021C, YIR028W, YPR080W, YLR420W, YNL…
GO:0019320	hexose catabolic process	0.00300438	1.8285938844041e-06	31	1573	57	6289	0.00%	0	YJL121C, YMR105C, YHR174W, YGR192C, YJL052W, YLR044C, YPR074C, YLR134W, YAL038W, YMR205C, YOR095C, YKL152C, YGL253W, YLR354C, YHR163W, YGR254W, YMR323W, YOL056W, YOL086C, YHR104W, YKL060C, YDR050C, YBR196C, YHR183W, YFR053C, YGR240C, YCR012W, YJR009C, YOR283W, YBR019C, YBR221C
GO:0006753	nucleoside phosphate metabolic process	0.00347114	2.11268504310401e-06	109	1573	295	6289	0.00%	0	YMR083W, YPL218W, YBL099W, YOR153W, YBL098W, YJR133W, YFR009W, YJR069C, YBR127C, YMR315W, YHR216W, YDL004W, YMR120C, YGR209C, YDL029W, YDL135C, YNL141W, YLR208W, YER136W, YCL050C, YDR196C, YJR025C, YDR377W, YJL121C, YGL234W, YKL151C, YKL181W, YFR047C, YPL271W, YER070W, YGL008C, YMR217W, YGR008C, YAL035W, YDL045C, YER122C, YIL066C, YCR021C, YPR080W, YLR420W, YNL220W, YBL039C, YGL037C, YOR185C, YML…
GO:0009117	nucleotide metabolic process	0.00347114	2.11268504310401e-06	109	1573	295	6289	0.00%	0	YMR083W, YPL218W, YBL099W, YOR153W, YBL098W, YJR133W, YFR009W, YJR069C, YBR127C, YMR315W, YHR216W, YDL004W, YMR120C, YGR209C, YDL029W, YDL135C, YNL141W, YLR208W, YER136W, YCL050C, YDR196C, YJR025C, YDR377W, YJL121C, YGL234W, YKL151C, YKL181W, YFR047C, YPL271W, YER070W, YGL008C, YMR217W, YGR008C, YAL035W, YDL045C, YER122C, YIL066C, YCR021C, YPR080W, YLR420W, YNL220W, YBL039C, YGL037C, YOR185C, YML…
GO:0072522	purine-containing compound biosynthetic process	0.00363052	2.2096900784797e-06	32	1573	60	6289	0.00%	0	YLR359W, YDR226W, YKL067W, YDR399W, YBL099W, YJR105W, YLR432W, YJR133W, YML022W, YML056C, YHR216W, YDL004W, YGR061C, YMR120C, YNL141W, YBR039W, YOR101W, YAR015W, YLR295C, YDR502C, YDR377W, YGL234W, YJR121W, YPL078C, YKL016C, YPL271W, YDR441C, YMR217W, YGL008C, YDR298C, YNL220W, YLR180W
GO:0046165	alcohol biosynthetic process	0.0037518	2.28350786747476e-06	44	1573	93	6289	0.00%	0	YMR202W, YMR083W, YMR015C, YHR007C, YJL052W, YLR044C, YGL062W, YKL152C, YGR254W, YEL012W, YIL053W, YOL086C, YKL060C, YDL055C, YKR043C, YMR303C, YPL117C, YER044C, YOR125C, YKR097W, YCR012W, YJR009C, YGL012W, YFL045C, YML008C, YDL168W, YER062C, YBR218C, YKL181W, YHR174W, YGR192C, YJR060W, YJL167W, YLR134W, YMR208W, YHL011C, YGR175C, YFL017C, YGR060W, YER003C, YDR050C, YBR196C, YPL028W, YBL068W
GO:0044085	cellular component biogenesis	0.00400279	2.43626740823879e-06	280	1573	894	6289	0.00%	0	YCR072C, YDR388W, YER102W, YNL079C, YHR079C-A, YDR339C, YFL038C, YNL222W, YGL029W, YDL092W, YPL131W, YLR167W, YEL015W, YLR418C, YDL029W, YJL010C, YDR424C, YML063W, YGL123W, YOL080C, YIL115C, YBR048W, YLR009W, YDL213C, YBR120C, YDL060W, YJL136C, YAL025C, YLR218C, YML024W, YHR089C, YBL072C, YBL003C, YNL031C, YGL078C, YDR427W, YKL096W, YDR101C, YMR230W, YHR170W, YER148W, YNL261W, YBL007C, YJL115W, Y…
GO:0046365	monosaccharide catabolic process	0.00582426	3.54489148062742e-06	32	1573	61	6289	0.00%	0	YMR105C, YDR368W, YJL052W, YLR044C, YPR074C, YAL038W, YKL152C, YLR354C, YGR254W, YOL086C, YHR104W, YKL060C, YHR183W, YCR012W, YJR009C, YBR019C, YJL121C, YGR192C, YHR174W, YLR134W, YOR095C, YMR205C, YGL253W, YHR163W, YOL056W, YMR323W, YBR196C, YDR050C, YFR053C, YGR240C, YOR283W, YBR221C
GO:0000028	ribosomal small subunit assembly	0.006056	3.68594148423019e-06	13	1573	16	6289	0.00%	0	YDR025W, YLR048W, YML024W, YNR054C, YGR214W, YDR447C, YGR159C, YBR048W, YKL156W, YJL191W, YCR031C, YLR167W, YHR021C
GO:0042273	ribosomal large subunit biogenesis	0.00606578	3.69189524673194e-06	40	1573	83	6289	0.00%	0	YCR072C, YDL136W, YEL054C, YOL077C, YDR418W, YPL131W, YPR016C, YPL146C, YDL191W, YPR143W, YKL009W, YDR060W, YLR075W, YOL041C, YLR340W, YJL122W, YOL080C, YFR001W, YDR091C, YER002W, YLR009W, YAL025C, YPL093W, YER126C, YPR102C, YCL054W, YGL078C, YLR221C, YLR448W, YOR063W, YML073C, YOL127W, YDR101C, YKR081C, YGR162W, YNL110C, YPL211W, YMR049C, YDR496C, YGR085C
GO:0009156	ribonucleoside monophosphate biosynthetic process	0.0061058	3.71625250893207e-06	20	1573	31	6289	0.00%	0	YLR359W, YDR020C, YGL234W, YKL181W, YDR399W, YJR105W, YLR432W, YHL011C, YJR133W, YML022W, YMR217W, YML056C, YHR216W, YGR061C, YMR120C, YEL021W, YNL141W, YAR015W, YKL216W, YBL068W
GO:0006007	glucose catabolic process	0.00741588	4.51362129301231e-06	28	1573	51	6289	0.00%	0	YJL121C, YHR174W, YGR192C, YJL052W, YLR044C, YPR074C, YLR134W, YAL038W, YMR205C, YOR095C, YKL152C, YGL253W, YLR354C, YHR163W, YGR254W, YMR323W, YOL056W, YOL086C, YKL060C, YDR050C, YBR196C, YHR183W, YFR053C, YGR240C, YCR012W, YJR009C, YOR283W, YBR221C
GO:0046164	alcohol catabolic process	0.00768001	4.67438001364483e-06	34	1573	67	6289	0.00%	0	YMR105C, YDR368W, YJL052W, YLR044C, YPR074C, YAL038W, YKL152C, YLR354C, YGR254W, YOL086C, YHR104W, YKL060C, YHR183W, YCR012W, YJR009C, YBR019C, YJL121C, YHR174W, YGR192C, YLR134W, YOR095C, YMR205C, YGL253W, YHR163W, YOL056W, YMR323W, YBR196C, YDR050C, YFR053C, YGR240C, YOR283W, YGL084C, YDL022W, YBR221C
GO:0070925	organelle assembly	0.00824277	5.01690496059831e-06	39	1573	81	6289	0.00%	0	YCR072C, YEL054C, YNR054C, YOL077C, YDR418W, YEL013W, YPL131W, YPR016C, YLR167W, YLR048W, YMR001C, YDR060W, YKL009W, YLR075W, YLR340W, YGR214W, YJL178C, YOL080C, YBR048W, YDR025W, YBL058W, YML024W, YPR102C, YDR447C, YGR159C, YPR041W, YGL078C, YLR221C, YLR448W, YOR063W, YML073C, YOL127W, YKR081C, YPL211W, YKL156W, YJL191W, YCR031C, YGR085C, YHR021C
GO:0006457	protein folding	0.00894055	5.44159950412055e-06	50	1573	113	6289	0.00%	0	YMR186W, YPL106C, YPL064C, YJR045C, YGR231C, YJL014W, YDR155C, YKL117W, YNL281W, YIL016W, YJR064W, YML094W, YML028W, YOR027W, YGR285C, YOR265W, YLR216C, YJL111W, YML074C, YDR518W, YJL008C, YOR232W, YER048C, YNL209W, YDR519W, YLR449W, YML078W, YOR020C, YNL064C, YHR176W, YDL143W, YPL240C, YML130C, YNL310C, YGL231C, YFR041C, YBR072W, YJR032W, YAL005C, YDL212W, YDL229W, YLL024C, YPL037C, YLR259C, YJR…
GO:0044282	small molecule catabolic process	0.00897824	5.46454263756196e-06	58	1573	137	6289	0.00%	0	YMR105C, YMR083W, YDR368W, YNL191W, YJL052W, YLR044C, YFR044C, YPR074C, YAL038W, YKL152C, YLR438W, YDR036C, YLR354C, YCL064C, YGR254W, YOL086C, YHR104W, YKL060C, YDL219W, YPL111W, YER086W, YHR183W, YNL239W, YMR303C, YLR089C, YHR037W, YCR012W, YJR009C, YDL215C, YBR019C, YJL068C, YDL168W, YAL044C, YOL055C, YJL121C, YHR174W, YGR192C, YLR231C, YLR134W, YMR205C, YOR095C, YGL253W, YHR163W, YOL056W, YMR…

## Sheet: top F
	top quartile – GO function
GOID	TERM	CORRECTED_PVALUE	UNCORRECTED_PVALUE	NUM_LIST_ANNOTATIONS	LIST_SIZE	TOTAL_NUM_ANNOTATIONS	POPULATION_SIZE	FDR_RATE	EXPECTED_FALSE_POSITIVES	ANNOTATED_GENES
GO:0003735	structural constituent of ribosome	4.3745940301512e-47	7.51648458788865e-50	156	1573	216	6289	0.00%	0	YLR325C, YDL136W, YER102W, YOR234C, YBL087C, YDR418W, YDL082W, YBL092W, YER117W, YGR027C, YKR057W, YGL031C, YPL131W, YPL013C, YLR167W, YOR158W, YLR388W, YML063W, YGL123W, YBR048W, YBR282W, YIL069C, YNL122C, YMR142C, YLR185W, YJL136C, YAL025C, YML024W, YDL081C, YGR076C, YBL072C, YPL143W, YGR215W, YDL184C, YDL130W, YBR084C-A, YBR189W, YMR230W, YKL138C, YLR344W, YBR191W, YHR021C, YOR312C, YGL103W, Y…
GO:0005198	structural molecule activity	1.31127915720863e-26	2.25305697114885e-29	186	1573	359	6289	0.00%	0	YLR325C, YDL136W, YER102W, YOR234C, YER011W, YBL087C, YDR418W, YDL082W, YBL092W, YER117W, YGR027C, YKR057W, YLL027W, YGL031C, YPL131W, YPL013C, YLR167W, YOR158W, YLR388W, YDR086C, YML063W, YGL123W, YIL115C, YBR048W, YBR282W, YIL069C, YNL122C, YMR142C, YLR185W, YJL136C, YAL025C, YML024W, YJL159W, YDL081C, YGR076C, YBL072C, YPL143W, YGR215W, YDL184C, YDL130W, YBR084C-A, YDR427W, YKL096W, YBR189W, Y…
GO:0016491	oxidoreductase activity	4.92632339223917e-11	8.46447318254152e-14	141	1573	325	6289	0.00%	0	YJL050W, YMR083W, YHR007C, YJL052W, YDL246C, YBR052C, YHR051W, YBL098W, YMR272C, YML080W, YIR035C, YBL069W, YHR104W, YGL039W, YOL071W, YIL125W, YCL018W, YML028W, YOR125C, YER174C, YDR518W, YJR009C, YDL215C, YDR256C, YHR001W-A, YDL168W, YMR152W, YJR025C, YAL044C, YER070W, YBR244W, YHR176W, YJL166W, YJR070C, YIR034C, YEL047C, YOR136W, YBR149W, YKR066C, YHR053C, YLR460C, YPR172W, YGL157W, YMR015C, Y…
GO:0003723	RNA binding	1.80738654955003e-07	3.10547517104817e-10	167	1573	440	6289	0.00%	0	YOR179C, YJR093C, YJL050W, YDL014W, YHL034C, YBR079C, YDL084W, YNL222W, YDL092W, YLR275W, YHR104W, YGL031C, YPL131W, YBL026W, YDR300C, YOR362C, YJL010C, YGL123W, YPR129W, YLR185W, YDL213C, YOR204W, YMR205C, YHR089C, YLR192C, YOR159C, YGL078C, YIR034C, YFL017W-A, YBR189W, YPR080W, YJR047C, YOR136W, YLR344W, YOR276W, YGL103W, YDL208W, YNL069C, YNL175C, YDR064W, YDR429C, YGL147C, YLR029C, YDR211W, Y…
GO:0008135	translation factor activity, nucleic acid binding	2.50572498827198e-06	4.30536939565633e-09	36	1573	59	6289	0.00%	0	YDR429C, YBR079C, YMR146C, YDR211W, YAL003W, YPR163C, YPR016C, YPL237W, YKR059W, YPL048W, YEL034W, YGL043W, YDR091C, YLR291C, YOR204W, YJL138C, YKL081W, YMR260C, YMR309C, YAL035W, YPR041W, YLR192C, YER025W, YJR007W, YPR080W, YJR047C, YLR249W, YOR133W, YJR014W, YGR162W, YDR385W, YBR118W, YOR361C, YNL244C, YOR276W, YOL139C
GO:0015078	hydrogen ion transmembrane transporter activity	5.3960497833391e-06	9.27156320161358e-09	33	1573	53	6289	0.00%	0	YGR183C, YLR447C, YBL099W, YHR051W, YDL067C, YLR038C, YGL191W, YBR127C, YBL045C, YDL004W, YLR395C, YMR256C, YBR039W, YLR295C, YHR001W-A, YMR244C-A, YDR377W, YJR121W, YPL078C, YKL016C, YHR039C-A, YPL271W, YEL051W, YGL008C, YJL166W, YDR298C, YEL024W, YEL027W, YPR191W, YKL080W, YDR529C, YGR020C, YPL234C
GO:0003743	translation initiation factor activity	1.17155884925827e-05	2.01298771350219e-08	26	1573	38	6289	0.00%	0	YJL138C, YOR204W, YDR429C, YBR079C, YMR146C, YDR211W, YMR260C, YPR163C, YMR309C, YAL035W, YPR016C, YPL237W, YPR041W, YLR192C, YER025W, YJR007W, YKR059W, YGR162W, YJR014W, YOR361C, YEL034W, YDR091C, YNL244C, YLR291C, YOL139C, YOR276W
GO:0015077	monovalent inorganic cation transmembrane transporter activity	0.000699243	1.20144847047305e-06	34	1573	64	6289	0.00%	0	YGR183C, YLR447C, YBL099W, YHR051W, YDL067C, YLR038C, YGL191W, YBR127C, YBL045C, YDL004W, YLR395C, YMR256C, YBR039W, YLR295C, YHR001W-A, YMR244C-A, YDR377W, YJR121W, YPL078C, YKL016C, YHR039C-A, YPL271W, YEL051W, YGL008C, YJL166W, YDR298C, YEL024W, YBR296C, YEL027W, YPR191W, YKL080W, YDR529C, YGR020C, YPL234C
GO:0046933	hydrogen ion transporting ATP synthase activity, rotational mechanism	0.00125858	2.16250874370357e-06	11	1573	12	6289	0.00%	0	YDR377W, YDR298C, YDL004W, YJR121W, YBL099W, YKL016C, YPL271W, YBR039W, YLR295C, YBR127C, YGR020C
GO:0046961	proton-transporting ATPase activity, rotational mechanism	0.00171833	2.95245442478458e-06	17	1573	24	6289	0.00%	0	YDR377W, YJR121W, YPL078C, YLR447C, YBL099W, YKL016C, YHR039C-A, YPL271W, YEL051W, YBR127C, YDR298C, YDL004W, YBR039W, YLR295C, YKL080W, YGR020C, YPL234C
GO:0019843	rRNA binding	0.00200847	3.45097630145687e-06	23	1573	38	6289	0.00%	0	YNL067W, YLR185W, YDL213C, YDR064W, YGL147C, YPR102C, YOL077C, YPL131W, YPL146C, YPL081W, YDR500C, YBR189W, YNL075W, YKL009W, YKR081C, YLR249W, YOR133W, YOL127W, YLR340W, YDR385W, YGL123W, YJL191W, YGR085C
GO:0016209	antioxidant activity	0.00216286	3.71625250893207e-06	20	1573	31	6289	0.00%	0	YMR038C, YLR109W, YDR513W, YBR244W, YJR104C, YCL035C, YPL091W, YDR353W, YML028W, YHR055C, YKR066C, YBR024W, YIR037W, YBR014C, YDR256C, YGR088W, YIR038C, YLR364W, YHR053C, YDR453C
GO:0048037	cofactor binding	0.00595174	1.02263589745642e-05	65	1573	161	6289	0.00%	0	YJL052W, YBR052C, YML080W, YLR438W, YCL064C, YLR303W, YGL039W, YDR294C, YDR191W, YHR179W, YDR353W, YIL125W, YNL037C, YCL018W, YKL029C, YJR009C, YIL116W, YBR019C, YDR032C, YGR192C, YLR134W, YHR176W, YML130C, YOL140W, YFL018C, YHR112C, YOR136W, YDL066W, YBR263W, YPR172W, YGL157W, YLR044C, YCR004C, YGL026C, YLR355C, YGR037C, YPL091W, YJR139C, YER086W, YBL036C, YHR137W, YHR183W, YML086C, YIL094C, YLR…
GO:0005199	structural constituent of cell wall	0.00704462	1.21041544722738e-05	12	1573	15	6289	0.00%	0	YDR077W, YBR067C, YKL096W-A, YKL096W, YER011W, YJL159W, YOR010C, YKL164C, YJL158C, YLR390W-A, YKL163W, YHR126C
GO:0003824	catalytic activity	0.00847654	1.45645069126479e-05	635	1573	2260	6289	0.00%	0	YOL097C, YMR202W, YHR007C, YFL038C, YBR052C, YHR051W, YFR044C, YBL098W, YDR140W, YBR011C, YIR035C, YBL069W, YHR068W, YDR294C, YOL071W, YDL126C, YMR120C, YML028W, YDR518W, YJR009C, YDR424C, YOL080C, YHR001W-A, YDR196C, YDR058C, YOR303W, YKL212W, YOR204W, YJL159W, YFR006W, YBR244W, YJL166W, YKL001C, YHR112C, YIR034C, YDR430C, YEL047C, YKR066C, YGL037C, YDR023W, YMR059W, YLR460C, YMR015C, YLR059C, Y…
GO:0016853	isomerase activity	0.00996076	1.71147015729624e-05	35	1573	73	6289	0.00%	0	YMR202W, YPL064C, YMR105C, YMR099C, YDR155C, YKL152C, YLR165C, YPL117C, YLR216C, YML074C, YDR518W, YBR019C, YMR278W, YDR051C, YFL045C, YJL121C, YPR060C, YOL143C, YDR519W, YLR449W, YML078W, YOR095C, YHR089C, YOL056W, YJR032W, YER003C, YDR050C, YBR196C, YPL212C, YJR017C, YDR304C, YOR283W, YLR175W, YNL135C, YOL006C

## Sheet: top C
	top quartile – GO component
GOID	TERM	CORRECTED_PVALUE	UNCORRECTED_PVALUE	NUM_LIST_ANNOTATIONS	LIST_SIZE	TOTAL_NUM_ANNOTATIONS	POPULATION_SIZE	FDR_RATE	EXPECTED_FALSE_POSITIVES	ANNOTATED_GENES
GO:0044445	cytosolic part	3.61508076691252e-74	8.73207914713169e-77	187	1573	227	6289	0.00%	0	YLR325C, YDL136W, YER102W, YOR234C, YBL087C, YDR418W, YDL082W, YBL092W, YFR009W, YER117W, YGR027C, YDR171W, YKR057W, YGL031C, YPL131W, YLR167W, YLR388W, YJL111W, YOR362C, YJL008C, YML063W, YGL123W, YBR048W, YIL069C, YMR142C, YLR185W, YJL136C, YML024W, YLR421C, YDL081C, YMR205C, YBL072C, YPL143W, YDL184C, YDL130W, YBR084C-A, YDR427W, YBR189W, YJR047C, YDR101C, YMR230W, YGR240C, YMR314W, YHR170W, Y…
GO:0022626	cytosolic ribosome	1.43062070277692e-72	3.45560556226309e-75	150	1573	164	6289	0.00%	0	YLR325C, YDL136W, YER102W, YOR234C, YBL087C, YDR418W, YDL082W, YBL092W, YFR009W, YER117W, YGR027C, YKR057W, YGL031C, YPL131W, YLR167W, YLR388W, YML063W, YGL123W, YBR048W, YIL069C, YMR142C, YLR185W, YJL136C, YML024W, YDL081C, YBL072C, YPL143W, YDL184C, YDL130W, YBR084C-A, YBR189W, YJR047C, YDR101C, YMR230W, YHR170W, YBR191W, YLR344W, YHR021C, YOR312C, YGL103W, YNL096C, YEL054C, YOL121C, YNL069C, Y…
GO:0005829	cytosol	1.4794705560972e-65	3.57360037704637e-68	267	1573	418	6289	0.00%	0	YLR325C, YER102W, YOR234C, YBL087C, YBL092W, YFR009W, YBR011C, YGR027C, YPL131W, YLR167W, YDL126C, YPL111W, YNL259C, YMR120C, YBL076C, YLR388W, YML028W, YJL111W, YML063W, YGL123W, YBR048W, YMR142C, YLR185W, YJL136C, YML024W, YMR205C, YBL072C, YPL143W, YDL130W, YBR084C-A, YDR427W, YEL047C, YMR079W, YDR101C, YMR230W, YHR170W, YBR191W, YOR312C, YGL103W, YNL096C, YOL121C, YJR045C, YJL190C, YDR064W, Y…
GO:0005840	ribosome	2.65979493220331e-51	6.4246254401046e-54	218	1573	345	6289	0.00%	0	YLR325C, YCR072C, YDL136W, YDL014W, YER102W, YOR234C, YFR044C, YBL087C, YKL056C, YDR418W, YDL082W, YBL092W, YFR009W, YER117W, YGR027C, YKR057W, YGL031C, YPL131W, YPL013C, YLR167W, YOR158W, YLR388W, YML063W, YGL123W, YBR048W, YBR282W, YIL069C, YBL028C, YNL122C, YMR142C, YLR185W, YBR120C, YJL136C, YAL025C, YML024W, YDL081C, YGR076C, YBL072C, YPL143W, YGR215W, YDL184C, YAL036C, YDL130W, YBR084C-A, Y…
GO:0044391	ribosomal subunit	1.3007095511169e-46	3.14181050994421e-49	160	1573	226	6289	0.00%	0	YLR325C, YDL136W, YER102W, YOR234C, YBL087C, YDR418W, YDL082W, YBL092W, YER117W, YGR027C, YKR057W, YGL031C, YPL131W, YPL013C, YLR167W, YOR158W, YLR388W, YML063W, YGL123W, YBR048W, YBR282W, YIL069C, YMR142C, YLR185W, YJL136C, YML024W, YDL081C, YGR076C, YBL072C, YPL143W, YGR215W, YDL184C, YDL130W, YBR084C-A, YBR189W, YDR101C, YMR230W, YKL138C, YHR170W, YLR344W, YBR191W, YHR021C, YOR312C, YGL103W, Y…
GO:0022625	cytosolic large ribosomal subunit	2.62166926904166e-42	6.3325344662842e-45	82	1573	86	6289	0.00%	0	YLR325C, YDL136W, YLL045C, YLR061W, YOL120C, YOR234C, YMR194W, YBL087C, YOL039W, YDR418W, YDL082W, YBL092W, YPL198W, YER117W, YHL033C, YGL031C, YPL131W, YDR500C, YFL034C-A, YLR185W, YMR142C, YDL081C, YFR032C-A, YGL030W, YPL220W, YPL143W, YDL184C, YDL130W, YBR084C-A, YGR148C, YLR448W, YDR101C, YKL006W, YHR170W, YLR344W, YBR191W, YGR085C, YGL103W, YOR312C, YEL054C, YNL069C, YGL147C, YLR029C, YJL189…
GO:0030529	ribonucleoprotein complex	6.33305165909801e-38	1.52972262297053e-40	306	1573	637	6289	0.00%	0	YLR325C, YCR072C, YER102W, YBR079C, YDR339C, YOR234C, YDL084W, YFR044C, YBL087C, YGL029W, YDL092W, YBL092W, YFR009W, YGR027C, YPL131W, YLR167W, YEL015W, YLR388W, YML028W, YJL010C, YML063W, YGL123W, YBR048W, YNL122C, YMR142C, YLR185W, YLR009W, YDL213C, YBR120C, YDL060W, YJL136C, YAL025C, YML024W, YGR076C, YHR089C, YBL072C, YPL143W, YGR215W, YOR159C, YDL130W, YBR084C-A, YPL225W, YEL047C, YBR160W, Y…
GO:0022627	cytosolic small ribosomal subunit	9.32704790382318e-30	2.25291012169642e-32	59	1573	62	6289	0.00%	0	YNL096C, YOL121C, YER102W, YJL190C, YDR064W, YNL178W, YGR027C, YKR057W, YLR167W, YLR048W, YLR441C, YPL081W, YHL015W, YLR388W, YLR367W, YMR116C, YDL061C, YGR214W, YLR264W, YML063W, YGL123W, YOR369C, YBR048W, YIL069C, YOR096W, YBR181C, YGR118W, YER131W, YDR025W, YJR145C, YDL083C, YML026C, YOR167C, YJL136C, YLR333C, YML024W, YPL090C, YDR450W, YDR447C, YHR203C, YOR293W, YJR123W, YBL072C, YAL035W, YPR…
GO:0015934	large ribosomal subunit	4.84558939017814e-29	1.17043221984979e-31	96	1573	131	6289	0.00%	0	YLR325C, YDL136W, YLL045C, YLR061W, YOL120C, YOR234C, YMR194W, YBL087C, YOL039W, YDR418W, YDL082W, YCR003W, YBL092W, YPL198W, YER117W, YHL033C, YGL031C, YPL131W, YDR500C, YFL034C-A, YOR150W, YBR282W, YMR142C, YLR185W, YDL081C, YFR032C-A, YGR076C, YGL030W, YPL220W, YPL143W, YDL184C, YDL130W, YBR084C-A, YGR148C, YLR448W, YDR101C, YKL006W, YKL138C, YHR170W, YGR085C, YBR191W, YLR344W, YOR312C, YGL103…
GO:0005737	cytoplasm	6.02863939749967e-16	1.4561930911835e-18	1072	1573	3701	6289	0.00%	0	YHR051W, YIL008W, YDR140W, YBR011C, YIR035C, YHR068W, YOL071W, YJR055W, YDL126C, YLR204W, YAR029W, YEL015W, YML028W, YJL111W, YJR009C, YML063W, YHR001W-A, YDR540C, YNL122C, YMR012W, YMR142C, YLR009W, YOR303W, YBR120C, YLR218C, YML024W, YNL155W, YBR244W, YKL001C, YIR034C, YDR510W, YDR430C, YEL047C, YMR079W, YGR059W, YDR031W, YKR066C, YGL037C, YMR059W, YGR207C, YGL103W, YNL096C, YLR059C, YJR045C, Y…
GO:0015935	small ribosomal subunit	9.84721894192696e-16	2.37855529998236e-18	64	1573	95	6289	0.00%	0	YNL096C, YOL121C, YER102W, YJL190C, YDR064W, YNL178W, YNL081C, YGR027C, YKR057W, YPL013C, YLR167W, YLR048W, YLR441C, YPL081W, YOR158W, YHL015W, YLR388W, YLR367W, YMR116C, YDL061C, YGR214W, YLR264W, YML063W, YGL123W, YOR369C, YBR048W, YIL069C, YOR096W, YBR181C, YGR118W, YER131W, YDR025W, YJR145C, YDL083C, YML026C, YOR167C, YJL136C, YLR333C, YML024W, YPL090C, YDR450W, YDR447C, YHR203C, YOR293W, YJR…
GO:0044444	cytoplasmic part	1.00669488402823e-12	2.43163015465757e-15	790	1573	2624	6289	0.00%	0	YNL111C, YMR202W, YOR016C, YHR007C, YNL079C, YBR079C, YFL038C, YHR051W, YFR044C, YBL087C, YBL098W, YDL092W, YLR297W, YBR011C, YPL131W, YDR294C, YOL071W, YLR167W, YDL126C, YLR204W, YNL259C, YMR120C, YEL015W, YKL063C, YML028W, YJL111W, YDR518W, YJR009C, YDR424C, YML063W, YHR001W-A, YDR196C, YDR058C, YNL122C, YMR012W, YMR142C, YOR303W, YKL212W, YBR120C, YJL136C, YLR218C, YML024W, YBR244W, YGR076C, Y…
GO:0001950	plasma membrane enriched fraction	1.69189022065332e-12	4.08669135423507e-15	55	1573	84	6289	0.00%	0	YMR186W, YOR317W, YDR099W, YGR292W, YJL052W, YLR109W, YAL038W, YLR432W, YCR004C, YPR165W, YGR254W, YOL086C, YLR303W, YJR065C, YMR183C, YBR078W, YMR120C, YCR010C, YDL135C, YER091C, YLR058C, YCR012W, YJR009C, YOL109W, YFL014W, YDR032C, YDR033W, YPR149W, YDL223C, YER177W, YNL209W, YJL138C, YDL124W, YHR174W, YGR192C, YMR215W, YBR299W, YDR158W, YGL008C, YFL005W, YDR050C, YBR196C, YAL005C, YMR008C, YCR…
GO:0043228	non-membrane-bounded organelle	6.9787023625418e-12	1.68567689916469e-14	401	1573	1184	6289	0.00%	0	YLR325C, YCR072C, YDR388W, YER102W, YNL079C, YBR079C, YHR079C-A, YDR339C, YOR234C, YDL084W, YFR044C, YBL087C, YGL029W, YBL092W, YFR009W, YGR027C, YPL131W, YLR167W, YOR341W, YEL015W, YLR388W, YLR418C, YDL029W, YJL010C, YDR424C, YML063W, YGL123W, YOL080C, YBR048W, YNL122C, YMR142C, YLR185W, YLR009W, YDL213C, YBR120C, YDL060W, YJL136C, YAL025C, YML024W, YGR076C, YHR089C, YBL072C, YBL003C, YPL143W, Y…
GO:0043232	intracellular non-membrane-bounded organelle	6.9787023625418e-12	1.68567689916469e-14	401	1573	1184	6289	0.00%	0	YLR325C, YCR072C, YDR388W, YER102W, YNL079C, YBR079C, YHR079C-A, YDR339C, YOR234C, YDL084W, YFR044C, YBL087C, YGL029W, YBL092W, YFR009W, YGR027C, YPL131W, YLR167W, YOR341W, YEL015W, YLR388W, YLR418C, YDL029W, YJL010C, YDR424C, YML063W, YGL123W, YOL080C, YBR048W, YNL122C, YMR142C, YLR185W, YLR009W, YDL213C, YBR120C, YDL060W, YJL136C, YAL025C, YML024W, YGR076C, YHR089C, YBL072C, YBL003C, YPL143W, Y…
GO:0005576	extracellular region	8.26890187055707e-11	1.99731929240509e-13	54	1573	87	6289	0.00%	0	YAR071W, YIL123W, YKR013W, YER011W, YOR010C, YGR279C, YOR383C, YMR305C, YGR037C, YNL160W, YBR162C, YBR078W, YKR042W, YOR382W, YLR037C, YKL164C, YNL066W, YER150W, YJL158C, YOL155C, YDR461W, YKL163W, YDR032C, YDR077W, YJR150C, YBR067C, YNL145W, YKL096W-A, YLR110C, YMR215W, YPL187W, YJL159W, YLR390W-A, YJR153W, YOL030W, YOR009W, YBR301W, YDR534C, YAL005C, YGL089C, YDR055W, YKL096W, YLL024C, YIL011W,…
GO:0030684	preribosome	1.57962806389389e-08	3.81552672438136e-11	72	1573	143	6289	0.00%	0	YOR145C, YDL136W, YDL014W, YER102W, YDR339C, YGL029W, YLR048W, YPR143W, YDR060W, YOL041C, YJL010C, YML063W, YGL123W, YBR048W, YBL028C, YLR009W, YDL213C, YDL060W, YER126C, YPL093W, YAL025C, YPL090C, YEL026W, YHR203C, YBL072C, YLR221C, YBR189W, YKR081C, YNL075W, YNL096C, YNL175C, YDR064W, YNR054C, YNL178W, YKL143W, YOL077C, YOR310C, YPR016C, YDL191W, YPL081W, YLR441C, YKL009W, YLR340W, YGR214W, YPL…
GO:0032991	macromolecular complex	4.96781243780078e-07	1.19995469512096e-09	584	1573	1950	6289	0.00%	0	YBR079C, YHR051W, YFR044C, YBL087C, YDL092W, YDR140W, YPL131W, YOL071W, YLR167W, YDL126C, YEL015W, YLR418C, YML028W, YJL111W, YDR424C, YML063W, YIL115C, YHR001W-A, YNL122C, YMR012W, YMR142C, YLR009W, YOR303W, YKL212W, YBR120C, YJL136C, YML024W, YGR076C, YBL003C, YJL166W, YOR159C, YEL047C, YGR059W, YEL027W, YPL065W, YMR059W, YER148W, YOR312C, YGL103W, YJL115W, YDL208W, YNL096C, YJR045C, YDR064W, Y…
GO:0009277	fungal-type cell wall	2.13961058530504e-05	5.16814151039864e-08	50	1573	100	6289	0.00%	0	YIL123W, YPL163C, YJL052W, YER011W, YOR010C, YNL190W, YGR279C, YOR383C, YMR305C, YBR162C, YBR078W, YKR042W, YOR382W, YLR037C, YKL164C, YNL066W, YER150W, YJR009C, YJL158C, YOL155C, YKL163W, YJR150C, YDR077W, YBR067C, YKL096W-A, YGR192C, YLR110C, YMR215W, YJL159W, YLR390W-A, YOL030W, YOR009W, YBR301W, YDR534C, YAL005C, YMR008C, YDR055W, YKL096W, YLL024C, YIL011W, YLR040C, YGR059W, YGR282C, YMR307W,…
GO:0016469	proton-transporting two-sector ATPase complex	4.70328893739213e-05	1.13606012980486e-07	20	1573	27	6289	0.00%	0	YDR377W, YJR121W, YPL078C, YLR447C, YBL099W, YKL016C, YHR039C-A, YPL271W, YEL051W, YBR127C, YGR008C, YDR298C, YDL004W, YDL130W-A, YEL027W, YBR039W, YLR295C, YKL080W, YGR020C, YPL234C
GO:0005618	cell wall	5.23460366766319e-05	1.26439702117468e-07	51	1573	105	6289	0.00%	0	YIL123W, YPL163C, YJL052W, YER011W, YOR010C, YNL190W, YGR279C, YOR383C, YMR305C, YBR162C, YHR126C, YBR078W, YKR042W, YOR382W, YLR037C, YKL164C, YNL066W, YER150W, YJR009C, YJL158C, YOL155C, YKL163W, YJR150C, YDR077W, YBR067C, YKL096W-A, YGR192C, YLR110C, YMR215W, YJL159W, YLR390W-A, YOL030W, YOR009W, YBR301W, YDR534C, YAL005C, YMR008C, YDR055W, YKL096W, YLL024C, YIL011W, YLR040C, YGR059W, YGR282C,…
GO:0030312	external encapsulating structure	5.23460366766319e-05	1.26439702117468e-07	51	1573	105	6289	0.00%	0	YIL123W, YPL163C, YJL052W, YER011W, YOR010C, YNL190W, YGR279C, YOR383C, YMR305C, YBR162C, YHR126C, YBR078W, YKR042W, YOR382W, YLR037C, YKL164C, YNL066W, YER150W, YJR009C, YJL158C, YOL155C, YKL163W, YJR150C, YDR077W, YBR067C, YKL096W-A, YGR192C, YLR110C, YMR215W, YJL159W, YLR390W-A, YOL030W, YOR009W, YBR301W, YDR534C, YAL005C, YMR008C, YDR055W, YKL096W, YLL024C, YIL011W, YLR040C, YGR059W, YGR282C,…
GO:0005753	mitochondrial proton-transporting ATP synthase complex	0.000240849	5.81759834126741e-07	12	1573	13	6289	0.00%	0	YDR377W, YDR298C, YDL004W, YJR121W, YPL078C, YDL130W-A, YBL099W, YKL016C, YPL271W, YBR039W, YLR295C, YGR008C
GO:0045259	proton-transporting ATP synthase complex	0.000240849	5.81759834126741e-07	12	1573	13	6289	0.00%	0	YDR377W, YDR298C, YDL004W, YJR121W, YPL078C, YDL130W-A, YBL099W, YKL016C, YPL271W, YBR039W, YLR295C, YGR008C
GO:0005730	nucleolus	0.00283473	6.84718492193842e-06	101	1573	275	6289	0.00%	0	YOR145C, YJL050W, YCR072C, YDR174W, YDL014W, YHR143W-A, YHL034C, YDR339C, YGL029W, YPL198W, YNL248C, YER112W, YBL026W, YJR063W, YOR341W, YPR143W, YDR060W, YOL041C, YML074C, YJL010C, YGL123W, YOL080C, YBR154C, YIL069C, YBL028C, YLR009W, YDL213C, YDR083W, YDL060W, YER126C, YPL093W, YBL018C, YDL051W, YKR092C, YAL025C, YBR167C, YCR035C, YEL026W, YHR089C, YNL308C, YLR196W, YDR021W, YLR221C, YGL078C, Y…
GO:0000267	cell fraction	0.00286036	6.90908958804184e-06	90	1573	239	6289	0.00%	0	YNL111C, YMR186W, YMR083W, YDR099W, YJL052W, YFL020C, YLR109W, YOR387C, YMR159C, YAL062W, YPR165W, YLR303W, YDL126C, YMR183C, YMR120C, YCL018W, YCR010C, YDL135C, YCR012W, YJR009C, YDR461W, YOR175C, YBR019C, YER136W, YFL014W, YDR032C, YDR033W, YPR149W, YNL090W, YER177W, YNL209W, YHR174W, YGR192C, YJL145W, YMR215W, YGL008C, YMR175W, YFL005W, YAL005C, YCR021C, YDL229W, YLL024C, YEL047C, YGL258W, YKL…
GO:0009295	nucleoid	0.00293032	7.07805933162248e-06	17	1573	25	6289	0.00%	0	YIL125W, YNL037C, YLR304C, YJR045C, YDR148C, YLR259C, YBL099W, YDL066W, YCL009C, YLR355C, YMR241W, YCL064C, YOR142W, YJR144W, YCR028C-A, YBR221C, YFL018C
GO:0042645	mitochondrial nucleoid	0.00293032	7.07805933162248e-06	17	1573	25	6289	0.00%	0	YIL125W, YNL037C, YLR304C, YJR045C, YDR148C, YLR259C, YBL099W, YDL066W, YCL009C, YLR355C, YMR241W, YCL064C, YOR142W, YJR144W, YCR028C-A, YBR221C, YFL018C
GO:0005746	mitochondrial respiratory chain	0.00351318	8.4859407748662e-06	16	1573	23	6289	0.00%	0	YBL045C, YLR395C, YEL024W, YGR183C, YMR256C, YOR065W, YHR051W, YDL067C, YDR178W, YLR038C, YGL191W, YPR191W, YDR529C, YHR001W-A, YJL166W, YOL071W
GO:0030686	90S preribosome	0.0047532	1.14811479799286e-05	41	1573	89	6289	0.00%	0	YOR145C, YNL096C, YDL014W, YER102W, YDR064W, YNL178W, YNR054C, YOR310C, YLR048W, YLR441C, YPL081W, YDR060W, YLR340W, YJL010C, YGR214W, YML063W, YPL266W, YBR048W, YOR096W, YDL213C, YDR025W, YJR145C, YDL060W, YLR409C, YPL090C, YGR081C, YHR203C, YJR123W, YBL072C, YBR189W, YLR197W, YOR039W, YNL075W, YGR145W, YER082C, YMR143W, YLR175W, YMR049C, YCR031C, YDR324C, YCL059C
GO:0070469	respiratory chain	0.00514733	1.24331563760445e-05	18	1573	28	6289	0.00%	0	YGR183C, YKL192C, YHR051W, YDL067C, YLR038C, YGL191W, YJL166W, YOL071W, YBL045C, YLR395C, YEL024W, YJR048W, YMR256C, YOR065W, YDR178W, YDR529C, YPR191W, YHR001W-A
GO:0044424	intracellular part	0.00598561	1.44579999490953e-05	1233	1573	4680	6289	0.00%	0	YHR051W, YIL008W, YDR140W, YBR011C, YIR035C, YHR068W, YOL071W, YJR055W, YDL126C, YLR204W, YAR029W, YEL015W, YML028W, YJL111W, YJR009C, YML063W, YIL115C, YHR001W-A, YDR540C, YNL122C, YMR012W, YMR142C, YLR009W, YOR303W, YBR120C, YLR218C, YML024W, YNL155W, YBR244W, YKL001C, YIR034C, YDR510W, YDR430C, YEL047C, YMR079W, YGR059W, YDR031W, YKR066C, YGL037C, YMR059W, YER148W, YGR207C, YGL103W, YNL096C, Y…
GO:0043614	multi-eIF complex	0.00625704	1.51136180630415e-05	8	1573	8	6289	0.00%	0	YER025W, YJR007W, YOR361C, YMR309C, YNL244C, YMR146C, YPL237W, YPR041W
GO:0005622	intracellular	0.00684637	1.65371343123143e-05	1238	1573	4703	6289	0.00%	0	YHR051W, YIL008W, YDR140W, YBR011C, YIR035C, YHR068W, YOL071W, YJR055W, YDL126C, YLR204W, YAR029W, YEL015W, YML028W, YJL111W, YJR009C, YML063W, YIL115C, YHR001W-A, YDR540C, YNL122C, YMR012W, YMR142C, YLR009W, YOR303W, YBR120C, YLR218C, YML024W, YNL155W, YBR244W, YKL001C, YIR034C, YDR510W, YDR430C, YEL047C, YMR079W, YGR059W, YDR031W, YKR066C, YGL037C, YMR059W, YER148W, YGR207C, YGL103W, YNL096C, Y…

## Sheet: bottom P
	bottom quartile – GO process
GOID	TERM	CORRECTED_PVALUE	UNCORRECTED_PVALUE	NUM_LIST_ANNOTATIONS	LIST_SIZE	TOTAL_NUM_ANNOTATIONS	POPULATION_SIZE	FDR_RATE	EXPECTED_FALSE_POSITIVES	ANNOTATED_GENES
GO:0019219	regulation of nucleobase-containing compound metabolic process	1.30785685165957e-05	6.97151839903823e-09	260	1573	775	6289	0.00%	0	YGL127C, YOR083W, YBR297W, YKL005C, YPL248C, YGR116W, YLR085C, YBR289W, YHR099W, YLL022C, YDL234C, YMR172W, YJL081C, YNL199C, YAL015C, YPL011C, YER064C, YDL220C, YPR065W, YGL013C, YOR380W, YGL107C, YDL002C, YJR086W, YLR266C, YJL206C, YPL042C, YDR217C, YOR290C, YGL066W, YIL046W, YDR421W, YGR262C, YFL031W, YOR140W, YIL122W, YMR164C, YHR006W, YBR202W, YOR134W, YJL076W, YDR167W, YPL070W, YHR153C, YDR…
GO:0051171	regulation of nitrogen compound metabolic process	2.27697698777104e-05	1.21374039859864e-08	260	1573	779	6289	0.00%	0	YGL127C, YOR083W, YBR297W, YKL005C, YPL248C, YGR116W, YLR085C, YBR289W, YHR099W, YLL022C, YDL234C, YMR172W, YJL081C, YNL199C, YAL015C, YPL011C, YER064C, YDL220C, YPR065W, YGL013C, YOR380W, YGL107C, YDL002C, YJR086W, YLR266C, YJL206C, YPL042C, YDR217C, YOR290C, YGL066W, YIL046W, YDR421W, YGR262C, YFL031W, YOR140W, YIL122W, YMR164C, YHR006W, YBR202W, YOR134W, YJL076W, YDR167W, YPL070W, YHR153C, YDR…
GO:0051252	regulation of RNA metabolic process	4.32362289776918e-05	2.30470303719039e-08	231	1573	682	6289	0.00%	0	YML127W, YLR033W, YGL127C, YML113W, YNL016W, YOR083W, YHL020C, YBR297W, YKL005C, YPL248C, YGR116W, YLR085C, YAR003W, YBR289W, YFL033C, YER111C, YHR099W, YLL022C, YMR172W, YKL208W, YJL081C, YNL199C, YMR070W, YBR050C, YIL149C, YDR145W, YML007W, YMR168C, YPL001W, YPL011C, YIR018W, YMR236W, YER064C, YOR172W, YLR417W, YDR308C, YHR124W, YPR065W, YGL013C, YGR163W, YOR380W, YGL107C, YNR063W, YJR147W, YDR…
GO:0006355	regulation of transcription, DNA-dependent	8.71773359949764e-05	4.64697953064906e-08	225	1573	666	6289	0.00%	0	YML127W, YLR033W, YGL127C, YML113W, YOR083W, YHL020C, YBR297W, YKL005C, YPL248C, YGR116W, YLR085C, YAR003W, YBR289W, YFL033C, YER111C, YHR099W, YLL022C, YMR172W, YJL081C, YNL199C, YMR070W, YBR050C, YIL149C, YDR145W, YML007W, YMR168C, YPL001W, YPL011C, YIR018W, YMR236W, YER064C, YOR172W, YLR417W, YDR308C, YHR124W, YPR065W, YGL013C, YGR163W, YOR380W, YNR063W, YJR147W, YDR303C, YIL101C, YDL002C, YOL…
GO:2001141	regulation of RNA biosynthetic process	8.71773359949764e-05	4.64697953064906e-08	225	1573	666	6289	0.00%	0	YML127W, YLR033W, YGL127C, YML113W, YOR083W, YHL020C, YBR297W, YKL005C, YPL248C, YGR116W, YLR085C, YAR003W, YBR289W, YFL033C, YER111C, YHR099W, YLL022C, YMR172W, YJL081C, YNL199C, YMR070W, YBR050C, YIL149C, YDR145W, YML007W, YMR168C, YPL001W, YPL011C, YIR018W, YMR236W, YER064C, YOR172W, YLR417W, YDR308C, YHR124W, YPR065W, YGL013C, YGR163W, YOR380W, YNR063W, YJR147W, YDR303C, YIL101C, YDL002C, YOL…
GO:0065007	biological regulation	0.000646134	3.4442118513602e-07	470	1573	1579	6289	0.00%	0	YDL035C, YER059W, YGL127C, YOR083W, YOR181W, YBR297W, YKL005C, YPL248C, YGR116W, YPR095C, YLR085C, YBR289W, YHR099W, YPL219W, YLL022C, YDL234C, YIL047C, YER166W, YMR172W, YML057W, YJL081C, YHR194W, YPL203W, YLR032W, YNL199C, YOL158C, YNL020C, YHR115C, YAL015C, YDR206W, YOR351C, YPL011C, YKR055W, YDR130C, YMR153W, YER064C, YDL194W, YDL220C, YPR065W, YGL013C, YGR099W, YPL140C, YOR380W, YLR467W, YGL…
GO:0050794	regulation of cellular process	0.000840958	4.48271664696574e-07	405	1573	1338	6289	0.00%	0	YDL035C, YER059W, YGL127C, YOR083W, YOR181W, YBR297W, YKL005C, YPL248C, YGR116W, YPR095C, YLR085C, YBR289W, YHR099W, YPL219W, YLL022C, YDL234C, YIL047C, YMR172W, YML057W, YJL081C, YPL203W, YLR032W, YNL199C, YNL020C, YHR115C, YAL015C, YDR206W, YOR351C, YPL011C, YKR055W, YDR130C, YMR153W, YER064C, YDL194W, YDL220C, YPR065W, YGL013C, YPL140C, YOR380W, YGL107C, YDL002C, YCL027W, YJR086W, YLR266C, YJL…
GO:0022402	cell cycle process	0.00124232	6.62218755420578e-07	190	1573	563	6289	0.00%	0	YML127W, YMR032W, YLR033W, YGL127C, YOR083W, YLR035C, YNL307C, YOR181W, YBR186W, YGR116W, YLR320W, YFL033C, YOR144C, YBR073W, YGL192W, YLR383W, YLR381W, YNL201C, YIL149C, YBL046W, YFR048W, YHR115C, YMR168C, YOR351C, YMR133W, YDR130C, YMR153W, YPL204W, YDL194W, YPL152W, YHR124W, YJR021C, YPL008W, YMR198W, YPR188C, YPL022W, YIL073C, YDR303C, YPL042C, YPL153C, YOR269W, YLR045C, YGR002C, YPL121C, YML…
GO:0050789	regulation of biological process	0.00239206	1.27508569656751e-06	414	1573	1383	6289	0.00%	0	YDL035C, YER059W, YGL127C, YOR083W, YOR181W, YBR297W, YKL005C, YPL248C, YGR116W, YPR095C, YLR085C, YBR289W, YHR099W, YPL219W, YLL022C, YDL234C, YIL047C, YMR172W, YML057W, YJL081C, YPL203W, YLR032W, YNL199C, YNL020C, YHR115C, YAL015C, YDR206W, YOR351C, YPL011C, YKR055W, YDR130C, YMR153W, YER064C, YDL194W, YDL220C, YPR065W, YGL013C, YPL140C, YOR380W, YGL107C, YDL002C, YCL027W, YJR086W, YLR266C, YJL…
GO:0007049	cell cycle	0.00286023	1.52464327505807e-06	213	1573	650	6289	0.00%	0	YML127W, YMR032W, YLR033W, YER059W, YGL127C, YOR083W, YLR035C, YNL307C, YOR181W, YBR186W, YGR116W, YLR320W, YFL033C, YOR144C, YBR073W, YGL113W, YGL192W, YLR383W, YPL219W, YLR381W, YPR111W, YNL201C, YIL149C, YBL046W, YFR048W, YHR115C, YMR168C, YOR351C, YMR133W, YDR130C, YMR153W, YPL204W, YDL194W, YPL152W, YHR124W, YDL220C, YJR021C, YDR182W, YPL008W, YMR198W, YDR416W, YPR188C, YPL022W, YIL073C, YDR…
GO:0006351	transcription, DNA-dependent	0.00379172	2.02117461735194e-06	234	1573	727	6289	0.00%	0	YML127W, YLR033W, YGL127C, YML113W, YOR083W, YHL020C, YBR297W, YKL005C, YPL248C, YGR116W, YLR085C, YAR003W, YBR289W, YFL033C, YER111C, YHR099W, YLL022C, YMR172W, YJL081C, YNL199C, YMR070W, YBR050C, YIL149C, YDR145W, YML007W, YMR168C, YPL001W, YPL011C, YIR018W, YMR236W, YER064C, YOR172W, YLR417W, YDR308C, YHR124W, YPR065W, YGL013C, YGR163W, YPR022C, YOR380W, YNR063W, YJR147W, YDR303C, YIL101C, YDL…
GO:0032774	RNA biosynthetic process	0.00426139	2.27153228792474e-06	234	1573	728	6289	0.00%	0	YML127W, YLR033W, YGL127C, YML113W, YOR083W, YHL020C, YBR297W, YKL005C, YPL248C, YGR116W, YLR085C, YAR003W, YBR289W, YFL033C, YER111C, YHR099W, YLL022C, YMR172W, YJL081C, YNL199C, YMR070W, YBR050C, YIL149C, YDR145W, YML007W, YMR168C, YPL001W, YPL011C, YIR018W, YMR236W, YER064C, YOR172W, YLR417W, YDR308C, YHR124W, YPR065W, YGL013C, YGR163W, YPR022C, YOR380W, YNR063W, YJR147W, YDR303C, YIL101C, YDL…
GO:XXXXXXX	unannotated	0.00433687	2.3117665767251e-06	232	1573	721	6289	0.00%	0	YER079C, YDR445C, YFL015C, YLR184W, YOL046C, YLR416C, YPR074W, YHR193C-A, YPR170W, YER084W, YCR087C, YLR169W, YOL050C, YPR195C, YJL220W, YAL004W, YKL177W, YIL032C, YIR040C, YOR146W, YHR028W, YNL013C, YJR087W, YPL062W, YER172C-A, YGL239C, YDR187C, YDR199W, YDR401W, YKL165C-A, YKL202W, YGL109W, YAL037C-B, YPR136C, YER084W-A, YDR203W, YLR322W, YAR069C, YGR051C, YPR014C, YKL097C, YAL045C, YLL059C, YG…

## Sheet: bottom F
	bottom quartile – GO function
GOID	TERM	CORRECTED_PVALUE	UNCORRECTED_PVALUE	NUM_LIST_ANNOTATIONS	LIST_SIZE	TOTAL_NUM_ANNOTATIONS	POPULATION_SIZE	FDR_RATE	EXPECTED_FALSE_POSITIVES	ANNOTATED_GENES
GO:0001071	nucleic acid binding transcription factor activity	1.57116011191194e-06	2.67204100665296e-09	84	1573	189	6289	0.00%	0	YNL068C, YDR423C, YOR083W, YCR018C, YOR363C, YBR297W, YLR228C, YPL248C, YGR116W, YBR240C, YCR042C, YER111C, YPL007C, YKL038W, YPL075W, YLL054C, YCR106W, YMR172W, YNL314W, YDR145W, YDL056W, YML007W, YNL167C, YMR168C, YPL011C, YIR018W, YMR236W, YIR023W, YOR172W, YHR124W, YPR065W, YGL013C, YOR380W, YJL089W, YDR213W, YFR034C, YNR063W, YJR147W, YHR084W, YIL101C, YDR303C, YLR266C, YJL206C, YFL021W, YPL…
GO:0003700	sequence-specific DNA binding transcription factor activity	1.57116011191194e-06	2.67204100665296e-09	84	1573	189	6289	0.00%	0	YNL068C, YDR423C, YOR083W, YCR018C, YOR363C, YBR297W, YLR228C, YPL248C, YGR116W, YBR240C, YCR042C, YER111C, YPL007C, YKL038W, YPL075W, YLL054C, YCR106W, YMR172W, YNL314W, YDR145W, YDL056W, YML007W, YNL167C, YMR168C, YPL011C, YIR018W, YMR236W, YIR023W, YOR172W, YHR124W, YPR065W, YGL013C, YOR380W, YJL089W, YDR213W, YFR034C, YNR063W, YJR147W, YHR084W, YIL101C, YDR303C, YLR266C, YJL206C, YFL021W, YPL…
GO:0043565	sequence-specific DNA binding	2.66830847359691e-05	4.53793958094712e-08	99	1573	245	6289	0.00%	0	YNL068C, YML113W, YDR423C, YOR083W, YCR018C, YOR363C, YKL032C, YLR228C, YPL248C, YER111C, YJL065C, YPL007C, YKL038W, YPL075W, YLL054C, YCR106W, YLR375W, YJL194W, YNL314W, YMR070W, YPR015C, YDL056W, YML007W, YNL167C, YMR168C, YKR101W, YIR018W, YIR023W, YOR172W, YFR031C, YHR124W, YDL220C, YPR065W, YGL013C, YPR022C, YGR099W, YNL250W, YOR380W, YJL089W, YDR213W, YFR034C, YNR063W, YJR147W, YHR084W, YIL…
GO:0000981	sequence-specific DNA binding RNA polymerase II transcription factor activity	0.000168372	2.86346262631324e-07	47	1573	96	6289	0.00%	0	YCR065W, YNL068C, YDR423C, YOR083W, YOR363C, YLR228C, YDR421W, YPL248C, YFL031W, YPR104C, YMR164C, YHR006W, YCR042C, YMR037C, YPL075W, YLL054C, YIL036W, YMR172W, YDR167W, YDR145W, YNL167C, YMR280C, YPL011C, YKL185W, YIR018W, YNL027W, YPL128C, YMR236W, YER169W, YMR227C, YPR199C, YPR065W, YGL013C, YOR162C, YKR034W, YJL110C, YDR213W, YJL089W, YER109C, YBR083W, YBR198C, YMR021C, YGL237C, YLR266C, YFL…
GO:0003677	DNA binding	0.000193802	3.29595197864319e-07	181	1573	527	6289	0.00%	0	YER162C, YML113W, YOR083W, YLR035C, YHL020C, YBR297W, YPL248C, YER111C, YBR073W, YLR383W, YLR375W, YLR032W, YMR070W, YPR015C, YDR145W, YML007W, YMR168C, YAL015C, YGR071C, YIR018W, YMR236W, YDR419W, YMR153W, YER064C, YOR172W, YHR124W, YDL220C, YPL008W, YPR065W, YGL013C, YPR022C, YPL022W, YGR099W, YOR380W, YNR063W, YJR147W, YDR303C, YDL002C, YIL101C, YLR266C, YJL206C, YPL153C, YFL021W, YPL049C, YDL…
GO:XXXXXXX	unannotated	0.00135932	2.3117665767251e-06	232	1573	721	6289	0.00%	0	YER079C, YDR445C, YFL015C, YLR184W, YOL046C, YLR416C, YPR074W, YHR193C-A, YPR170W, YER084W, YCR087C, YLR169W, YOL050C, YPR195C, YJL220W, YAL004W, YKL177W, YIL032C, YIR040C, YOR146W, YHR028W, YNL013C, YJR087W, YPL062W, YER172C-A, YGL239C, YDR187C, YDR199W, YDR401W, YKL165C-A, YKL202W, YGL109W, YAL037C-B, YPR136C, YER084W-A, YDR203W, YLR322W, YAR069C, YGR051C, YPR014C, YKL097C, YAL045C, YLL059C, YG…

## Sheet: bottom C
	bottom quartile – GO component
GOID	TERM	CORRECTED_PVALUE	UNCORRECTED_PVALUE	NUM_LIST_ANNOTATIONS	LIST_SIZE	TOTAL_NUM_ANNOTATIONS	POPULATION_SIZE	FDR_RATE	EXPECTED_FALSE_POSITIVES	ANNOTATED_GENES
GO:XXXXXXX	unannotated	0.00100562	2.3117665767251e-06	232	1573	721	6289	0.00%	0	YER079C, YDR445C, YFL015C, YLR184W, YOL046C, YLR416C, YPR074W, YHR193C-A, YPR170W, YER084W, YCR087C, YLR169W, YOL050C, YPR195C, YJL220W, YAL004W, YKL177W, YIL032C, YIR040C, YOR146W, YHR028W, YNL013C, YJR087W, YPL062W, YER172C-A, YGL239C, YDR187C, YDR199W, YDR401W, YKL165C-A, YKL202W, YGL109W, YAL037C-B, YPR136C, YER084W-A, YDR203W, YLR322W, YAR069C, YGR051C, YPR014C, YKL097C, YAL045C, YLL059C, YG…
